# Supplementary material for: Incidence of Induced Abortion in Uganda, 2013: New Estimates Since 2003
Source: PubMed Central journal article supplement (PMC5089684; doi:10.1371/journal.pone.0165812), 2016-11-01
Supplement: pone.0165812.s001.pdf [file pone.0165812.s001.pdf]

Qr. # 

|  |  |  |
|--|--|--|
|  |  |  |
|--|--|--|

**STUDY ON ABORTION AND POSTABORTION CARE**

***SURVEY OF HEALTH FACILITIES IN UGANDA, 2013***

**CONSENT**

My name is \_\_\_\_\_. and I am working with the Makerere University School of Public Health. The School in conjunction with the Guttmacher Institute, a USA research organization, is conducting a national study to assess post-abortion care. We would like to ask for your cooperation in getting a better picture of the situation in Uganda. The research will provide information about reproductive health care and will contribute to the improvement of maternal health in Uganda and beyond.

Your health facility has been randomly selected to be part of this study. Your responses about care provided in your facility will be completely confidential and will be used for research purposes only. No personal reference will be made to your participation in this study. Participating in this survey poses little if any risk. Your responses and those of other health providers in Uganda will be used to describe the general picture of abortion care in Uganda. This interview will take at least an hour of your time.

While we would like to note that your expertise and experience make your participation critical and your views valuable to us, we would also like to emphasize that your participation is absolutely voluntary and that you are at liberty to terminate the interview at any time. Although we expect that the results of this study will help improve the nation's health care system, there will be no direct financial benefit to you personally.

Do you agree to proceed with the interview?

AGREE.....

DO NOT AGREE.....

Reason for refusal: \_\_\_\_\_  
\_\_\_\_\_  
\_\_\_\_\_

Thank you

## Health Facility Information

001 HEALTH FACILITY NAME: \_\_\_\_\_

002 PHYSICAL ADDRESS: \_\_\_\_\_

003 COUNTY: \_\_\_\_\_

004 DISTRICT: \_\_\_\_\_

005 LOCATION: URBAN ..... 1  
RURAL ..... 2

006 TYPE OF HEALTH FACILITY  
HOSPITAL ..... 1  
HEALTH CENTER IV ..... 2  
HEALTH CENTER III ..... 3  
PRIVATE MIDWIFE ..... 4

007 OWNERSHIP Public/Government..... 1  
Non-governmental organization (NGO)..... 2  
Private..... 3

008 INTERVIEWER'S NAME: \_\_\_\_\_

009 INTERVIEWER'S CODE:

010 TIME STARTED:   hr   min TIME ENDED:   hr   min

011 DATE OF INTERVIEW:

012 INTERVIEW OUTCOME: Completed..... 1  
Refused..... 2  
Incomplete..... 3  
Other (specify) \_\_\_\_\_ 96

Please specify why the interview is not complete

---



---



---

Interviewer observations:

---



---



---

## Module I: Background Information

|     | Questions and Instructions                                                                                                                                                                                                                                                                                                                                          | Responses, Codes and Filters                                                                                                                                                                                                                                                                                                                                                                                                                                                                                                                                                                                                                                                                                                                                                                                                                                                                                                                                                                                                                                                                                                                                                                                                                                                                                                                                                                                                                                                                                                                                                                                                                                                                                                                                                                                                                                                                                                                                                                                                                                                      |   |   |   |   |    |   |   |    |   |   |   |   |    |
|-----|---------------------------------------------------------------------------------------------------------------------------------------------------------------------------------------------------------------------------------------------------------------------------------------------------------------------------------------------------------------------|-----------------------------------------------------------------------------------------------------------------------------------------------------------------------------------------------------------------------------------------------------------------------------------------------------------------------------------------------------------------------------------------------------------------------------------------------------------------------------------------------------------------------------------------------------------------------------------------------------------------------------------------------------------------------------------------------------------------------------------------------------------------------------------------------------------------------------------------------------------------------------------------------------------------------------------------------------------------------------------------------------------------------------------------------------------------------------------------------------------------------------------------------------------------------------------------------------------------------------------------------------------------------------------------------------------------------------------------------------------------------------------------------------------------------------------------------------------------------------------------------------------------------------------------------------------------------------------------------------------------------------------------------------------------------------------------------------------------------------------------------------------------------------------------------------------------------------------------------------------------------------------------------------------------------------------------------------------------------------------------------------------------------------------------------------------------------------------|---|---|---|---|----|---|---|----|---|---|---|---|----|
| 101 | What is your official position [profession] at this facility?<br><br><b><i>[[Interviewer: DO NOT PROMPT.<br/>Circle the category that applies to the respondent.]</i></b><br><br><b><i>Nurse = Enrolled and registered nurses<br/>Trained midwife = Enrolled and registered midwives<br/>Comprehensive nurse = Enrolled and registered comprehensive nurses</i></b> | OB-GYN..... <table border="1" style="display: inline-table; vertical-align: middle;"><tr><td style="text-align: center;">1</td></tr></table><br>Medical Officer/GP..... <table border="1" style="display: inline-table; vertical-align: middle;"><tr><td style="text-align: center;">2</td></tr></table><br>Clinical Officer..... <table border="1" style="display: inline-table; vertical-align: middle;"><tr><td style="text-align: center;">3</td></tr></table><br>Trained Midwife..... <table border="1" style="display: inline-table; vertical-align: middle;"><tr><td style="text-align: center;">4</td></tr></table><br>Nurse..... <table border="1" style="display: inline-table; vertical-align: middle;"><tr><td style="text-align: center;">5</td></tr></table><br>Comprehensive nurse ..... <table border="1" style="display: inline-table; vertical-align: middle;"><tr><td style="text-align: center;">6</td></tr></table><br>Nurse Aide..... <table border="1" style="display: inline-table; vertical-align: middle;"><tr><td style="text-align: center;">7</td></tr></table><br>Other (Specify) _____ <table border="1" style="display: inline-table; vertical-align: middle;"><tr><td style="text-align: center;">96</td></tr></table>                                                                                                                                                                                                                                                                                                                                                                                                                                                                                                                                                                                                                                                                                                                                                                                                                           | 1 | 2 | 3 | 4 | 5  | 6 | 7 | 96 |   |   |   |   |    |
| 1   |                                                                                                                                                                                                                                                                                                                                                                     |                                                                                                                                                                                                                                                                                                                                                                                                                                                                                                                                                                                                                                                                                                                                                                                                                                                                                                                                                                                                                                                                                                                                                                                                                                                                                                                                                                                                                                                                                                                                                                                                                                                                                                                                                                                                                                                                                                                                                                                                                                                                                   |   |   |   |   |    |   |   |    |   |   |   |   |    |
| 2   |                                                                                                                                                                                                                                                                                                                                                                     |                                                                                                                                                                                                                                                                                                                                                                                                                                                                                                                                                                                                                                                                                                                                                                                                                                                                                                                                                                                                                                                                                                                                                                                                                                                                                                                                                                                                                                                                                                                                                                                                                                                                                                                                                                                                                                                                                                                                                                                                                                                                                   |   |   |   |   |    |   |   |    |   |   |   |   |    |
| 3   |                                                                                                                                                                                                                                                                                                                                                                     |                                                                                                                                                                                                                                                                                                                                                                                                                                                                                                                                                                                                                                                                                                                                                                                                                                                                                                                                                                                                                                                                                                                                                                                                                                                                                                                                                                                                                                                                                                                                                                                                                                                                                                                                                                                                                                                                                                                                                                                                                                                                                   |   |   |   |   |    |   |   |    |   |   |   |   |    |
| 4   |                                                                                                                                                                                                                                                                                                                                                                     |                                                                                                                                                                                                                                                                                                                                                                                                                                                                                                                                                                                                                                                                                                                                                                                                                                                                                                                                                                                                                                                                                                                                                                                                                                                                                                                                                                                                                                                                                                                                                                                                                                                                                                                                                                                                                                                                                                                                                                                                                                                                                   |   |   |   |   |    |   |   |    |   |   |   |   |    |
| 5   |                                                                                                                                                                                                                                                                                                                                                                     |                                                                                                                                                                                                                                                                                                                                                                                                                                                                                                                                                                                                                                                                                                                                                                                                                                                                                                                                                                                                                                                                                                                                                                                                                                                                                                                                                                                                                                                                                                                                                                                                                                                                                                                                                                                                                                                                                                                                                                                                                                                                                   |   |   |   |   |    |   |   |    |   |   |   |   |    |
| 6   |                                                                                                                                                                                                                                                                                                                                                                     |                                                                                                                                                                                                                                                                                                                                                                                                                                                                                                                                                                                                                                                                                                                                                                                                                                                                                                                                                                                                                                                                                                                                                                                                                                                                                                                                                                                                                                                                                                                                                                                                                                                                                                                                                                                                                                                                                                                                                                                                                                                                                   |   |   |   |   |    |   |   |    |   |   |   |   |    |
| 7   |                                                                                                                                                                                                                                                                                                                                                                     |                                                                                                                                                                                                                                                                                                                                                                                                                                                                                                                                                                                                                                                                                                                                                                                                                                                                                                                                                                                                                                                                                                                                                                                                                                                                                                                                                                                                                                                                                                                                                                                                                                                                                                                                                                                                                                                                                                                                                                                                                                                                                   |   |   |   |   |    |   |   |    |   |   |   |   |    |
| 96  |                                                                                                                                                                                                                                                                                                                                                                     |                                                                                                                                                                                                                                                                                                                                                                                                                                                                                                                                                                                                                                                                                                                                                                                                                                                                                                                                                                                                                                                                                                                                                                                                                                                                                                                                                                                                                                                                                                                                                                                                                                                                                                                                                                                                                                                                                                                                                                                                                                                                                   |   |   |   |   |    |   |   |    |   |   |   |   |    |
| 102 | Respondent's sex                                                                                                                                                                                                                                                                                                                                                    | Male..... <table border="1" style="display: inline-table; vertical-align: middle;"><tr><td style="text-align: center;">1</td></tr></table><br>Female..... <table border="1" style="display: inline-table; vertical-align: middle;"><tr><td style="text-align: center;">2</td></tr></table>                                                                                                                                                                                                                                                                                                                                                                                                                                                                                                                                                                                                                                                                                                                                                                                                                                                                                                                                                                                                                                                                                                                                                                                                                                                                                                                                                                                                                                                                                                                                                                                                                                                                                                                                                                                        | 1 | 2 |   |   |    |   |   |    |   |   |   |   |    |
| 1   |                                                                                                                                                                                                                                                                                                                                                                     |                                                                                                                                                                                                                                                                                                                                                                                                                                                                                                                                                                                                                                                                                                                                                                                                                                                                                                                                                                                                                                                                                                                                                                                                                                                                                                                                                                                                                                                                                                                                                                                                                                                                                                                                                                                                                                                                                                                                                                                                                                                                                   |   |   |   |   |    |   |   |    |   |   |   |   |    |
| 2   |                                                                                                                                                                                                                                                                                                                                                                     |                                                                                                                                                                                                                                                                                                                                                                                                                                                                                                                                                                                                                                                                                                                                                                                                                                                                                                                                                                                                                                                                                                                                                                                                                                                                                                                                                                                                                                                                                                                                                                                                                                                                                                                                                                                                                                                                                                                                                                                                                                                                                   |   |   |   |   |    |   |   |    |   |   |   |   |    |
| 103 | How old are you?                                                                                                                                                                                                                                                                                                                                                    | <input style="width: 20px; height: 20px; border: 1px solid black;" type="text"/> <input style="width: 20px; height: 20px; border: 1px solid black;" type="text"/> Years                                                                                                                                                                                                                                                                                                                                                                                                                                                                                                                                                                                                                                                                                                                                                                                                                                                                                                                                                                                                                                                                                                                                                                                                                                                                                                                                                                                                                                                                                                                                                                                                                                                                                                                                                                                                                                                                                                           |   |   |   |   |    |   |   |    |   |   |   |   |    |
| 104 | What is your highest professional/academic qualification you have completed?<br><br><b><i>[[Interviewer: Read the categories if necessary.]</i></b>                                                                                                                                                                                                                 | Certificate..... <table border="1" style="display: inline-table; vertical-align: middle;"><tr><td style="text-align: center;">1</td></tr></table><br>Diploma ..... <table border="1" style="display: inline-table; vertical-align: middle;"><tr><td style="text-align: center;">2</td></tr></table><br>Degree..... <table border="1" style="display: inline-table; vertical-align: middle;"><tr><td style="text-align: center;">3</td></tr></table><br>Post graduate..... <table border="1" style="display: inline-table; vertical-align: middle;"><tr><td style="text-align: center;">4</td></tr></table><br>Other (Specify) _____ <table border="1" style="display: inline-table; vertical-align: middle;"><tr><td style="text-align: center;">96</td></tr></table>                                                                                                                                                                                                                                                                                                                                                                                                                                                                                                                                                                                                                                                                                                                                                                                                                                                                                                                                                                                                                                                                                                                                                                                                                                                                                                             | 1 | 2 | 3 | 4 | 96 |   |   |    |   |   |   |   |    |
| 1   |                                                                                                                                                                                                                                                                                                                                                                     |                                                                                                                                                                                                                                                                                                                                                                                                                                                                                                                                                                                                                                                                                                                                                                                                                                                                                                                                                                                                                                                                                                                                                                                                                                                                                                                                                                                                                                                                                                                                                                                                                                                                                                                                                                                                                                                                                                                                                                                                                                                                                   |   |   |   |   |    |   |   |    |   |   |   |   |    |
| 2   |                                                                                                                                                                                                                                                                                                                                                                     |                                                                                                                                                                                                                                                                                                                                                                                                                                                                                                                                                                                                                                                                                                                                                                                                                                                                                                                                                                                                                                                                                                                                                                                                                                                                                                                                                                                                                                                                                                                                                                                                                                                                                                                                                                                                                                                                                                                                                                                                                                                                                   |   |   |   |   |    |   |   |    |   |   |   |   |    |
| 3   |                                                                                                                                                                                                                                                                                                                                                                     |                                                                                                                                                                                                                                                                                                                                                                                                                                                                                                                                                                                                                                                                                                                                                                                                                                                                                                                                                                                                                                                                                                                                                                                                                                                                                                                                                                                                                                                                                                                                                                                                                                                                                                                                                                                                                                                                                                                                                                                                                                                                                   |   |   |   |   |    |   |   |    |   |   |   |   |    |
| 4   |                                                                                                                                                                                                                                                                                                                                                                     |                                                                                                                                                                                                                                                                                                                                                                                                                                                                                                                                                                                                                                                                                                                                                                                                                                                                                                                                                                                                                                                                                                                                                                                                                                                                                                                                                                                                                                                                                                                                                                                                                                                                                                                                                                                                                                                                                                                                                                                                                                                                                   |   |   |   |   |    |   |   |    |   |   |   |   |    |
| 96  |                                                                                                                                                                                                                                                                                                                                                                     |                                                                                                                                                                                                                                                                                                                                                                                                                                                                                                                                                                                                                                                                                                                                                                                                                                                                                                                                                                                                                                                                                                                                                                                                                                                                                                                                                                                                                                                                                                                                                                                                                                                                                                                                                                                                                                                                                                                                                                                                                                                                                   |   |   |   |   |    |   |   |    |   |   |   |   |    |
| 105 | Whats your main responsibility at this facility?<br><br><b><i>[[Interviewer: Read the categories if necessary.]</i></b>                                                                                                                                                                                                                                             | Facility administrator..... <table border="1" style="display: inline-table; vertical-align: middle;"><tr><td style="text-align: center;">1</td></tr></table><br>Facility in-charge..... <table border="1" style="display: inline-table; vertical-align: middle;"><tr><td style="text-align: center;">2</td></tr></table><br>Unit/Department in-charge..... <table border="1" style="display: inline-table; vertical-align: middle;"><tr><td style="text-align: center;">3</td></tr></table><br>Health care provider (non-administrative)..... <table border="1" style="display: inline-table; vertical-align: middle;"><tr><td style="text-align: center;">4</td></tr></table><br>Other (Specify)_____ <table border="1" style="display: inline-table; vertical-align: middle;"><tr><td style="text-align: center;">96</td></tr></table>                                                                                                                                                                                                                                                                                                                                                                                                                                                                                                                                                                                                                                                                                                                                                                                                                                                                                                                                                                                                                                                                                                                                                                                                                                          | 1 | 2 | 3 | 4 | 96 |   |   |    |   |   |   |   |    |
| 1   |                                                                                                                                                                                                                                                                                                                                                                     |                                                                                                                                                                                                                                                                                                                                                                                                                                                                                                                                                                                                                                                                                                                                                                                                                                                                                                                                                                                                                                                                                                                                                                                                                                                                                                                                                                                                                                                                                                                                                                                                                                                                                                                                                                                                                                                                                                                                                                                                                                                                                   |   |   |   |   |    |   |   |    |   |   |   |   |    |
| 2   |                                                                                                                                                                                                                                                                                                                                                                     |                                                                                                                                                                                                                                                                                                                                                                                                                                                                                                                                                                                                                                                                                                                                                                                                                                                                                                                                                                                                                                                                                                                                                                                                                                                                                                                                                                                                                                                                                                                                                                                                                                                                                                                                                                                                                                                                                                                                                                                                                                                                                   |   |   |   |   |    |   |   |    |   |   |   |   |    |
| 3   |                                                                                                                                                                                                                                                                                                                                                                     |                                                                                                                                                                                                                                                                                                                                                                                                                                                                                                                                                                                                                                                                                                                                                                                                                                                                                                                                                                                                                                                                                                                                                                                                                                                                                                                                                                                                                                                                                                                                                                                                                                                                                                                                                                                                                                                                                                                                                                                                                                                                                   |   |   |   |   |    |   |   |    |   |   |   |   |    |
| 4   |                                                                                                                                                                                                                                                                                                                                                                     |                                                                                                                                                                                                                                                                                                                                                                                                                                                                                                                                                                                                                                                                                                                                                                                                                                                                                                                                                                                                                                                                                                                                                                                                                                                                                                                                                                                                                                                                                                                                                                                                                                                                                                                                                                                                                                                                                                                                                                                                                                                                                   |   |   |   |   |    |   |   |    |   |   |   |   |    |
| 96  |                                                                                                                                                                                                                                                                                                                                                                     |                                                                                                                                                                                                                                                                                                                                                                                                                                                                                                                                                                                                                                                                                                                                                                                                                                                                                                                                                                                                                                                                                                                                                                                                                                                                                                                                                                                                                                                                                                                                                                                                                                                                                                                                                                                                                                                                                                                                                                                                                                                                                   |   |   |   |   |    |   |   |    |   |   |   |   |    |
| 106 | How many years have you worked in your current primary profession?<br><b><i>[[Interviewer: If less than 1 year, fill 00]</i></b>                                                                                                                                                                                                                                    | <input style="width: 20px; height: 20px; border: 1px solid black;" type="text"/> <input style="width: 20px; height: 20px; border: 1px solid black;" type="text"/> Years                                                                                                                                                                                                                                                                                                                                                                                                                                                                                                                                                                                                                                                                                                                                                                                                                                                                                                                                                                                                                                                                                                                                                                                                                                                                                                                                                                                                                                                                                                                                                                                                                                                                                                                                                                                                                                                                                                           |   |   |   |   |    |   |   |    |   |   |   |   |    |
| 107 | How many years have you worked in your primary profession IN THIS FACILITY?<br><b><i>[[Interviewer: If less than 1 year, fill 00]</i></b>                                                                                                                                                                                                                           | <input style="width: 20px; height: 20px; border: 1px solid black;" type="text"/> <input style="width: 20px; height: 20px; border: 1px solid black;" type="text"/> Years                                                                                                                                                                                                                                                                                                                                                                                                                                                                                                                                                                                                                                                                                                                                                                                                                                                                                                                                                                                                                                                                                                                                                                                                                                                                                                                                                                                                                                                                                                                                                                                                                                                                                                                                                                                                                                                                                                           |   |   |   |   |    |   |   |    |   |   |   |   |    |
| 108 | Which units/departments does this facility have?<br><br><b><i>[[Interviewer: READ out all categories. Multiple responses are allowed]</i></b>                                                                                                                                                                                                                       | Outpatient (ambulatory)..... <table border="1" style="display: inline-table; vertical-align: middle;"><tr><td style="text-align: center;">1</td></tr></table><br>Inpatient unit..... <table border="1" style="display: inline-table; vertical-align: middle;"><tr><td style="text-align: center;">1</td></tr></table><br>Operating room/theater..... <table border="1" style="display: inline-table; vertical-align: middle;"><tr><td style="text-align: center;">1</td></tr></table><br>Evacuation room..... <table border="1" style="display: inline-table; vertical-align: middle;"><tr><td style="text-align: center;">1</td></tr></table><br>Gynaecological Ward..... <table border="1" style="display: inline-table; vertical-align: middle;"><tr><td style="text-align: center;">1</td></tr></table><br>Labor Ward..... <table border="1" style="display: inline-table; vertical-align: middle;"><tr><td style="text-align: center;">1</td></tr></table><br>Maternity Ward..... <table border="1" style="display: inline-table; vertical-align: middle;"><tr><td style="text-align: center;">1</td></tr></table><br>MCH/FP unit..... <table border="1" style="display: inline-table; vertical-align: middle;"><tr><td style="text-align: center;">1</td></tr></table><br>Intensive care unit (ICU)..... <table border="1" style="display: inline-table; vertical-align: middle;"><tr><td style="text-align: center;">1</td></tr></table><br>Emergency ward..... <table border="1" style="display: inline-table; vertical-align: middle;"><tr><td style="text-align: center;">1</td></tr></table><br>Laboratory..... <table border="1" style="display: inline-table; vertical-align: middle;"><tr><td style="text-align: center;">1</td></tr></table><br>Pharmacy..... <table border="1" style="display: inline-table; vertical-align: middle;"><tr><td style="text-align: center;">1</td></tr></table><br>Other (specify) _____ <table border="1" style="display: inline-table; vertical-align: middle;"><tr><td style="text-align: center;">96</td></tr></table><br>_____ | 1 | 1 | 1 | 1 | 1  | 1 | 1 | 1  | 1 | 1 | 1 | 1 | 96 |
| 1   |                                                                                                                                                                                                                                                                                                                                                                     |                                                                                                                                                                                                                                                                                                                                                                                                                                                                                                                                                                                                                                                                                                                                                                                                                                                                                                                                                                                                                                                                                                                                                                                                                                                                                                                                                                                                                                                                                                                                                                                                                                                                                                                                                                                                                                                                                                                                                                                                                                                                                   |   |   |   |   |    |   |   |    |   |   |   |   |    |
| 1   |                                                                                                                                                                                                                                                                                                                                                                     |                                                                                                                                                                                                                                                                                                                                                                                                                                                                                                                                                                                                                                                                                                                                                                                                                                                                                                                                                                                                                                                                                                                                                                                                                                                                                                                                                                                                                                                                                                                                                                                                                                                                                                                                                                                                                                                                                                                                                                                                                                                                                   |   |   |   |   |    |   |   |    |   |   |   |   |    |
| 1   |                                                                                                                                                                                                                                                                                                                                                                     |                                                                                                                                                                                                                                                                                                                                                                                                                                                                                                                                                                                                                                                                                                                                                                                                                                                                                                                                                                                                                                                                                                                                                                                                                                                                                                                                                                                                                                                                                                                                                                                                                                                                                                                                                                                                                                                                                                                                                                                                                                                                                   |   |   |   |   |    |   |   |    |   |   |   |   |    |
| 1   |                                                                                                                                                                                                                                                                                                                                                                     |                                                                                                                                                                                                                                                                                                                                                                                                                                                                                                                                                                                                                                                                                                                                                                                                                                                                                                                                                                                                                                                                                                                                                                                                                                                                                                                                                                                                                                                                                                                                                                                                                                                                                                                                                                                                                                                                                                                                                                                                                                                                                   |   |   |   |   |    |   |   |    |   |   |   |   |    |
| 1   |                                                                                                                                                                                                                                                                                                                                                                     |                                                                                                                                                                                                                                                                                                                                                                                                                                                                                                                                                                                                                                                                                                                                                                                                                                                                                                                                                                                                                                                                                                                                                                                                                                                                                                                                                                                                                                                                                                                                                                                                                                                                                                                                                                                                                                                                                                                                                                                                                                                                                   |   |   |   |   |    |   |   |    |   |   |   |   |    |
| 1   |                                                                                                                                                                                                                                                                                                                                                                     |                                                                                                                                                                                                                                                                                                                                                                                                                                                                                                                                                                                                                                                                                                                                                                                                                                                                                                                                                                                                                                                                                                                                                                                                                                                                                                                                                                                                                                                                                                                                                                                                                                                                                                                                                                                                                                                                                                                                                                                                                                                                                   |   |   |   |   |    |   |   |    |   |   |   |   |    |
| 1   |                                                                                                                                                                                                                                                                                                                                                                     |                                                                                                                                                                                                                                                                                                                                                                                                                                                                                                                                                                                                                                                                                                                                                                                                                                                                                                                                                                                                                                                                                                                                                                                                                                                                                                                                                                                                                                                                                                                                                                                                                                                                                                                                                                                                                                                                                                                                                                                                                                                                                   |   |   |   |   |    |   |   |    |   |   |   |   |    |
| 1   |                                                                                                                                                                                                                                                                                                                                                                     |                                                                                                                                                                                                                                                                                                                                                                                                                                                                                                                                                                                                                                                                                                                                                                                                                                                                                                                                                                                                                                                                                                                                                                                                                                                                                                                                                                                                                                                                                                                                                                                                                                                                                                                                                                                                                                                                                                                                                                                                                                                                                   |   |   |   |   |    |   |   |    |   |   |   |   |    |
| 1   |                                                                                                                                                                                                                                                                                                                                                                     |                                                                                                                                                                                                                                                                                                                                                                                                                                                                                                                                                                                                                                                                                                                                                                                                                                                                                                                                                                                                                                                                                                                                                                                                                                                                                                                                                                                                                                                                                                                                                                                                                                                                                                                                                                                                                                                                                                                                                                                                                                                                                   |   |   |   |   |    |   |   |    |   |   |   |   |    |
| 1   |                                                                                                                                                                                                                                                                                                                                                                     |                                                                                                                                                                                                                                                                                                                                                                                                                                                                                                                                                                                                                                                                                                                                                                                                                                                                                                                                                                                                                                                                                                                                                                                                                                                                                                                                                                                                                                                                                                                                                                                                                                                                                                                                                                                                                                                                                                                                                                                                                                                                                   |   |   |   |   |    |   |   |    |   |   |   |   |    |
| 1   |                                                                                                                                                                                                                                                                                                                                                                     |                                                                                                                                                                                                                                                                                                                                                                                                                                                                                                                                                                                                                                                                                                                                                                                                                                                                                                                                                                                                                                                                                                                                                                                                                                                                                                                                                                                                                                                                                                                                                                                                                                                                                                                                                                                                                                                                                                                                                                                                                                                                                   |   |   |   |   |    |   |   |    |   |   |   |   |    |
| 1   |                                                                                                                                                                                                                                                                                                                                                                     |                                                                                                                                                                                                                                                                                                                                                                                                                                                                                                                                                                                                                                                                                                                                                                                                                                                                                                                                                                                                                                                                                                                                                                                                                                                                                                                                                                                                                                                                                                                                                                                                                                                                                                                                                                                                                                                                                                                                                                                                                                                                                   |   |   |   |   |    |   |   |    |   |   |   |   |    |
| 96  |                                                                                                                                                                                                                                                                                                                                                                     |                                                                                                                                                                                                                                                                                                                                                                                                                                                                                                                                                                                                                                                                                                                                                                                                                                                                                                                                                                                                                                                                                                                                                                                                                                                                                                                                                                                                                                                                                                                                                                                                                                                                                                                                                                                                                                                                                                                                                                                                                                                                                   |   |   |   |   |    |   |   |    |   |   |   |   |    |

|                                              |                                                                                                                                                                                                                                                                 |                                                                                                                                                                                                                                                                                                                                                                                                                                                                                                                                                                                                                                                                                                                                                                                                                                                                                                                                                                                                                                                                  |                                     |   |                               |   |                         |   |                         |   |                                              |   |                                             |   |                    |   |                        |   |                       |    |
|----------------------------------------------|-----------------------------------------------------------------------------------------------------------------------------------------------------------------------------------------------------------------------------------------------------------------|------------------------------------------------------------------------------------------------------------------------------------------------------------------------------------------------------------------------------------------------------------------------------------------------------------------------------------------------------------------------------------------------------------------------------------------------------------------------------------------------------------------------------------------------------------------------------------------------------------------------------------------------------------------------------------------------------------------------------------------------------------------------------------------------------------------------------------------------------------------------------------------------------------------------------------------------------------------------------------------------------------------------------------------------------------------|-------------------------------------|---|-------------------------------|---|-------------------------|---|-------------------------|---|----------------------------------------------|---|---------------------------------------------|---|--------------------|---|------------------------|---|-----------------------|----|
| 109                                          | <p>Which of the following women's reproductive health services does this facility provide?</p> <p><b><i>[[Interviewer: Read out all categories. Multiple responses are allowed]]</i></b></p>                                                                    | <table border="0"> <tr><td>OB-GYN specialists/consultants.....</td><td style="border: 1px solid black; text-align: center;">1</td></tr> <tr><td>Maternity/antenatal care.....</td><td style="border: 1px solid black; text-align: center;">1</td></tr> <tr><td>Delivery services... ..</td><td style="border: 1px solid black; text-align: center;">1</td></tr> <tr><td>Post abortion care.....</td><td style="border: 1px solid black; text-align: center;">1</td></tr> <tr><td>Post-abortion contraceptive counselling.....</td><td style="border: 1px solid black; text-align: center;">1</td></tr> <tr><td>HIV/AIDS (Diagnosis and/or treatment) .....</td><td style="border: 1px solid black; text-align: center;">1</td></tr> <tr><td>Immunization .....</td><td style="border: 1px solid black; text-align: center;">1</td></tr> <tr><td>None of the above.....</td><td style="border: 1px solid black; text-align: center;">1</td></tr> <tr><td>Other (specify) _____</td><td style="border: 1px solid black; text-align: center;">96</td></tr> </table> | OB-GYN specialists/consultants..... | 1 | Maternity/antenatal care..... | 1 | Delivery services... .. | 1 | Post abortion care..... | 1 | Post-abortion contraceptive counselling..... | 1 | HIV/AIDS (Diagnosis and/or treatment) ..... | 1 | Immunization ..... | 1 | None of the above..... | 1 | Other (specify) _____ | 96 |
| OB-GYN specialists/consultants.....          | 1                                                                                                                                                                                                                                                               |                                                                                                                                                                                                                                                                                                                                                                                                                                                                                                                                                                                                                                                                                                                                                                                                                                                                                                                                                                                                                                                                  |                                     |   |                               |   |                         |   |                         |   |                                              |   |                                             |   |                    |   |                        |   |                       |    |
| Maternity/antenatal care.....                | 1                                                                                                                                                                                                                                                               |                                                                                                                                                                                                                                                                                                                                                                                                                                                                                                                                                                                                                                                                                                                                                                                                                                                                                                                                                                                                                                                                  |                                     |   |                               |   |                         |   |                         |   |                                              |   |                                             |   |                    |   |                        |   |                       |    |
| Delivery services... ..                      | 1                                                                                                                                                                                                                                                               |                                                                                                                                                                                                                                                                                                                                                                                                                                                                                                                                                                                                                                                                                                                                                                                                                                                                                                                                                                                                                                                                  |                                     |   |                               |   |                         |   |                         |   |                                              |   |                                             |   |                    |   |                        |   |                       |    |
| Post abortion care.....                      | 1                                                                                                                                                                                                                                                               |                                                                                                                                                                                                                                                                                                                                                                                                                                                                                                                                                                                                                                                                                                                                                                                                                                                                                                                                                                                                                                                                  |                                     |   |                               |   |                         |   |                         |   |                                              |   |                                             |   |                    |   |                        |   |                       |    |
| Post-abortion contraceptive counselling..... | 1                                                                                                                                                                                                                                                               |                                                                                                                                                                                                                                                                                                                                                                                                                                                                                                                                                                                                                                                                                                                                                                                                                                                                                                                                                                                                                                                                  |                                     |   |                               |   |                         |   |                         |   |                                              |   |                                             |   |                    |   |                        |   |                       |    |
| HIV/AIDS (Diagnosis and/or treatment) .....  | 1                                                                                                                                                                                                                                                               |                                                                                                                                                                                                                                                                                                                                                                                                                                                                                                                                                                                                                                                                                                                                                                                                                                                                                                                                                                                                                                                                  |                                     |   |                               |   |                         |   |                         |   |                                              |   |                                             |   |                    |   |                        |   |                       |    |
| Immunization .....                           | 1                                                                                                                                                                                                                                                               |                                                                                                                                                                                                                                                                                                                                                                                                                                                                                                                                                                                                                                                                                                                                                                                                                                                                                                                                                                                                                                                                  |                                     |   |                               |   |                         |   |                         |   |                                              |   |                                             |   |                    |   |                        |   |                       |    |
| None of the above.....                       | 1                                                                                                                                                                                                                                                               |                                                                                                                                                                                                                                                                                                                                                                                                                                                                                                                                                                                                                                                                                                                                                                                                                                                                                                                                                                                                                                                                  |                                     |   |                               |   |                         |   |                         |   |                                              |   |                                             |   |                    |   |                        |   |                       |    |
| Other (specify) _____                        | 96                                                                                                                                                                                                                                                              |                                                                                                                                                                                                                                                                                                                                                                                                                                                                                                                                                                                                                                                                                                                                                                                                                                                                                                                                                                                                                                                                  |                                     |   |                               |   |                         |   |                         |   |                                              |   |                                             |   |                    |   |                        |   |                       |    |
| 110                                          | How many beds does this facility have in total?                                                                                                                                                                                                                 | <input type="text"/> <input type="text"/> <input type="text"/> <input type="text"/> Beds                                                                                                                                                                                                                                                                                                                                                                                                                                                                                                                                                                                                                                                                                                                                                                                                                                                                                                                                                                         |                                     |   |                               |   |                         |   |                         |   |                                              |   |                                             |   |                    |   |                        |   |                       |    |
| 111                                          | How many people in this facility are trained to provide PAC services?                                                                                                                                                                                           | <input type="text"/> <input type="text"/> Staff <b>[If '0' Skip to Module 2]</b>                                                                                                                                                                                                                                                                                                                                                                                                                                                                                                                                                                                                                                                                                                                                                                                                                                                                                                                                                                                 |                                     |   |                               |   |                         |   |                         |   |                                              |   |                                             |   |                    |   |                        |   |                       |    |
| 112                                          | <p>Is a staff member trained in PAC available to attend to patients rarely, sometimes, or always?</p> <p><b><i>[[If respondent notes that staff members have different availability, take the answer for the staff member that is MOST available.]]</i></b></p> | <table border="0"> <tr><td>Rarely.....</td><td style="border: 1px solid black; text-align: center;">1</td></tr> <tr><td>Sometimes.....</td><td style="border: 1px solid black; text-align: center;">2</td></tr> <tr><td>Always.....</td><td style="border: 1px solid black; text-align: center;">3</td></tr> </table>                                                                                                                                                                                                                                                                                                                                                                                                                                                                                                                                                                                                                                                                                                                                            | Rarely.....                         | 1 | Sometimes.....                | 2 | Always.....             | 3 |                         |   |                                              |   |                                             |   |                    |   |                        |   |                       |    |
| Rarely.....                                  | 1                                                                                                                                                                                                                                                               |                                                                                                                                                                                                                                                                                                                                                                                                                                                                                                                                                                                                                                                                                                                                                                                                                                                                                                                                                                                                                                                                  |                                     |   |                               |   |                         |   |                         |   |                                              |   |                                             |   |                    |   |                        |   |                       |    |
| Sometimes.....                               | 2                                                                                                                                                                                                                                                               |                                                                                                                                                                                                                                                                                                                                                                                                                                                                                                                                                                                                                                                                                                                                                                                                                                                                                                                                                                                                                                                                  |                                     |   |                               |   |                         |   |                         |   |                                              |   |                                             |   |                    |   |                        |   |                       |    |
| Always.....                                  | 3                                                                                                                                                                                                                                                               |                                                                                                                                                                                                                                                                                                                                                                                                                                                                                                                                                                                                                                                                                                                                                                                                                                                                                                                                                                                                                                                                  |                                     |   |                               |   |                         |   |                         |   |                                              |   |                                             |   |                    |   |                        |   |                       |    |

## Module II: Postabortion Care

Now, I would like to ask you some questions regarding **medical care for abortion patients treated at this facility, regardless of whether the abortion was spontaneous or induced.** I will also ask about **the number of patients that are treated for abortion complications at this facility.** By abortion complications, we are referring to those complications that are severe enough to **need treatment** in a health facility. Abortion complications include not only **extremely serious cases** such as sepsis or a perforated uterus, but also those cases which are termed "incomplete abortions." Incomplete abortions are usually identified by heavy bleeding, and present a somewhat **less severe** health risk to the woman, but still need treatment at a health facility. In answering the following set of questions concerning abortion complications, please keep this definition in mind.

**[Interviewer: Note that the abortion complication questions refer to both spontaneous and induced abortions. You should repeat this as often as possible while completing this section.]**

|                                    |                                                                                                                                                                                                                                                                                                                                                                                                                                                                                                                                                                                                                                                                                                                                                                                                                         |                                                                                                                                                                                                                                                                                                                                                                                                                                                                                                                                                                                                                                                                                                                                                                                                                                                                                                                                                                                                                                                                                                                                                                                                                                                                                                                                                       |                                    |                                |                     |                                |                      |                                |                          |                                |                 |                                |                     |                                |                          |                                |                                |                                |                     |                                |                       |                                 |
|------------------------------------|-------------------------------------------------------------------------------------------------------------------------------------------------------------------------------------------------------------------------------------------------------------------------------------------------------------------------------------------------------------------------------------------------------------------------------------------------------------------------------------------------------------------------------------------------------------------------------------------------------------------------------------------------------------------------------------------------------------------------------------------------------------------------------------------------------------------------|-------------------------------------------------------------------------------------------------------------------------------------------------------------------------------------------------------------------------------------------------------------------------------------------------------------------------------------------------------------------------------------------------------------------------------------------------------------------------------------------------------------------------------------------------------------------------------------------------------------------------------------------------------------------------------------------------------------------------------------------------------------------------------------------------------------------------------------------------------------------------------------------------------------------------------------------------------------------------------------------------------------------------------------------------------------------------------------------------------------------------------------------------------------------------------------------------------------------------------------------------------------------------------------------------------------------------------------------------------|------------------------------------|--------------------------------|---------------------|--------------------------------|----------------------|--------------------------------|--------------------------|--------------------------------|-----------------|--------------------------------|---------------------|--------------------------------|--------------------------|--------------------------------|--------------------------------|--------------------------------|---------------------|--------------------------------|-----------------------|---------------------------------|
| 201                                | <p>a. Normally (Generally), about how many deliveries take place at your facility each month?</p> <p><i>[Interviewer: Ask for the total number in the year 2012, in case respondent can't answer per month]</i></p> <p>b. Out of this number, about how many are still births?</p>                                                                                                                                                                                                                                                                                                                                                                                                                                                                                                                                      | <p><input type="text" value="1"/> Deliveries per month <input type="text"/> <input type="text"/> <input type="text"/> <input type="text"/> <input type="text"/></p> <p style="text-align: center;">OR</p> <p><input type="text" value="2"/> Total number of deliveries during the 2012 calendar year <input type="text"/> <input type="text"/> <input type="text"/> <input type="text"/> <input type="text"/></p> <p><input type="text"/> <input type="text"/> <input type="text"/></p> <p><i>[If no still births are represented, write in '0.']</i></p>                                                                                                                                                                                                                                                                                                                                                                                                                                                                                                                                                                                                                                                                                                                                                                                             |                                    |                                |                     |                                |                      |                                |                          |                                |                 |                                |                     |                                |                          |                                |                                |                                |                     |                                |                       |                                 |
| 202                                | <p>a. Does this facility treat women with spontaneous or induced abortion?</p> <p>b. In which sections of this health facility are post-abortion patients treated?</p> <p><i>[Interviewer: Read out the list of wards and circle all that apply]</i></p>                                                                                                                                                                                                                                                                                                                                                                                                                                                                                                                                                                | <p>Yes..... <input type="text" value="1"/> → <b>[Go to Q202 part b.]</b><br/>         No..... <input type="text" value="2"/> → <b>[Go to Q208]</b></p> <table style="width: 100%; border-collapse: collapse;"> <tr><td>Outpatient ward/Recovery room.....</td><td style="text-align: center;"><input type="text" value="1"/></td></tr> <tr><td>Operating Room.....</td><td style="text-align: center;"><input type="text" value="1"/></td></tr> <tr><td>Evacuation Room.....</td><td style="text-align: center;"><input type="text" value="1"/></td></tr> <tr><td>Gyneacological ward.....</td><td style="text-align: center;"><input type="text" value="1"/></td></tr> <tr><td>Labor Ward.....</td><td style="text-align: center;"><input type="text" value="1"/></td></tr> <tr><td>Maternity ward.....</td><td style="text-align: center;"><input type="text" value="1"/></td></tr> <tr><td>General female ward.....</td><td style="text-align: center;"><input type="text" value="1"/></td></tr> <tr><td>Intensive care unit (ICU).....</td><td style="text-align: center;"><input type="text" value="1"/></td></tr> <tr><td>Emergency room.....</td><td style="text-align: center;"><input type="text" value="1"/></td></tr> <tr><td>Other (specify) _____</td><td style="text-align: center;"><input type="text" value="96"/></td></tr> </table> | Outpatient ward/Recovery room..... | <input type="text" value="1"/> | Operating Room..... | <input type="text" value="1"/> | Evacuation Room..... | <input type="text" value="1"/> | Gyneacological ward..... | <input type="text" value="1"/> | Labor Ward..... | <input type="text" value="1"/> | Maternity ward..... | <input type="text" value="1"/> | General female ward..... | <input type="text" value="1"/> | Intensive care unit (ICU)..... | <input type="text" value="1"/> | Emergency room..... | <input type="text" value="1"/> | Other (specify) _____ | <input type="text" value="96"/> |
| Outpatient ward/Recovery room..... | <input type="text" value="1"/>                                                                                                                                                                                                                                                                                                                                                                                                                                                                                                                                                                                                                                                                                                                                                                                          |                                                                                                                                                                                                                                                                                                                                                                                                                                                                                                                                                                                                                                                                                                                                                                                                                                                                                                                                                                                                                                                                                                                                                                                                                                                                                                                                                       |                                    |                                |                     |                                |                      |                                |                          |                                |                 |                                |                     |                                |                          |                                |                                |                                |                     |                                |                       |                                 |
| Operating Room.....                | <input type="text" value="1"/>                                                                                                                                                                                                                                                                                                                                                                                                                                                                                                                                                                                                                                                                                                                                                                                          |                                                                                                                                                                                                                                                                                                                                                                                                                                                                                                                                                                                                                                                                                                                                                                                                                                                                                                                                                                                                                                                                                                                                                                                                                                                                                                                                                       |                                    |                                |                     |                                |                      |                                |                          |                                |                 |                                |                     |                                |                          |                                |                                |                                |                     |                                |                       |                                 |
| Evacuation Room.....               | <input type="text" value="1"/>                                                                                                                                                                                                                                                                                                                                                                                                                                                                                                                                                                                                                                                                                                                                                                                          |                                                                                                                                                                                                                                                                                                                                                                                                                                                                                                                                                                                                                                                                                                                                                                                                                                                                                                                                                                                                                                                                                                                                                                                                                                                                                                                                                       |                                    |                                |                     |                                |                      |                                |                          |                                |                 |                                |                     |                                |                          |                                |                                |                                |                     |                                |                       |                                 |
| Gyneacological ward.....           | <input type="text" value="1"/>                                                                                                                                                                                                                                                                                                                                                                                                                                                                                                                                                                                                                                                                                                                                                                                          |                                                                                                                                                                                                                                                                                                                                                                                                                                                                                                                                                                                                                                                                                                                                                                                                                                                                                                                                                                                                                                                                                                                                                                                                                                                                                                                                                       |                                    |                                |                     |                                |                      |                                |                          |                                |                 |                                |                     |                                |                          |                                |                                |                                |                     |                                |                       |                                 |
| Labor Ward.....                    | <input type="text" value="1"/>                                                                                                                                                                                                                                                                                                                                                                                                                                                                                                                                                                                                                                                                                                                                                                                          |                                                                                                                                                                                                                                                                                                                                                                                                                                                                                                                                                                                                                                                                                                                                                                                                                                                                                                                                                                                                                                                                                                                                                                                                                                                                                                                                                       |                                    |                                |                     |                                |                      |                                |                          |                                |                 |                                |                     |                                |                          |                                |                                |                                |                     |                                |                       |                                 |
| Maternity ward.....                | <input type="text" value="1"/>                                                                                                                                                                                                                                                                                                                                                                                                                                                                                                                                                                                                                                                                                                                                                                                          |                                                                                                                                                                                                                                                                                                                                                                                                                                                                                                                                                                                                                                                                                                                                                                                                                                                                                                                                                                                                                                                                                                                                                                                                                                                                                                                                                       |                                    |                                |                     |                                |                      |                                |                          |                                |                 |                                |                     |                                |                          |                                |                                |                                |                     |                                |                       |                                 |
| General female ward.....           | <input type="text" value="1"/>                                                                                                                                                                                                                                                                                                                                                                                                                                                                                                                                                                                                                                                                                                                                                                                          |                                                                                                                                                                                                                                                                                                                                                                                                                                                                                                                                                                                                                                                                                                                                                                                                                                                                                                                                                                                                                                                                                                                                                                                                                                                                                                                                                       |                                    |                                |                     |                                |                      |                                |                          |                                |                 |                                |                     |                                |                          |                                |                                |                                |                     |                                |                       |                                 |
| Intensive care unit (ICU).....     | <input type="text" value="1"/>                                                                                                                                                                                                                                                                                                                                                                                                                                                                                                                                                                                                                                                                                                                                                                                          |                                                                                                                                                                                                                                                                                                                                                                                                                                                                                                                                                                                                                                                                                                                                                                                                                                                                                                                                                                                                                                                                                                                                                                                                                                                                                                                                                       |                                    |                                |                     |                                |                      |                                |                          |                                |                 |                                |                     |                                |                          |                                |                                |                                |                     |                                |                       |                                 |
| Emergency room.....                | <input type="text" value="1"/>                                                                                                                                                                                                                                                                                                                                                                                                                                                                                                                                                                                                                                                                                                                                                                                          |                                                                                                                                                                                                                                                                                                                                                                                                                                                                                                                                                                                                                                                                                                                                                                                                                                                                                                                                                                                                                                                                                                                                                                                                                                                                                                                                                       |                                    |                                |                     |                                |                      |                                |                          |                                |                 |                                |                     |                                |                          |                                |                                |                                |                     |                                |                       |                                 |
| Other (specify) _____              | <input type="text" value="96"/>                                                                                                                                                                                                                                                                                                                                                                                                                                                                                                                                                                                                                                                                                                                                                                                         |                                                                                                                                                                                                                                                                                                                                                                                                                                                                                                                                                                                                                                                                                                                                                                                                                                                                                                                                                                                                                                                                                                                                                                                                                                                                                                                                                       |                                    |                                |                     |                                |                      |                                |                          |                                |                 |                                |                     |                                |                          |                                |                                |                                |                     |                                |                       |                                 |
| 203                                | <p>In this facility, are <b>post-abortion care patients</b> treated as <b>outpatients</b> (they don't spend the night in the facility), as <b>inpatients</b> (they spend at least one night in the facility) or both?</p>                                                                                                                                                                                                                                                                                                                                                                                                                                                                                                                                                                                               | <p>Outpatient only ..... 1<br/>         Inpatient only ..... 2 → <b>[Skip to Q206]</b><br/>         Both..... 3</p>                                                                                                                                                                                                                                                                                                                                                                                                                                                                                                                                                                                                                                                                                                                                                                                                                                                                                                                                                                                                                                                                                                                                                                                                                                   |                                    |                                |                     |                                |                      |                                |                          |                                |                 |                                |                     |                                |                          |                                |                                |                                |                     |                                |                       |                                 |
| 204                                | <p>During a <b>typical</b> month, about how many such <b>post-abortion care patients</b> would you estimate are treated as <b>outpatients</b> at this facility as a whole? Please remember to include all <b>post-abortion care patients</b> whether they are due to spontaneous or induced abortions.</p> <p><i>[Interviewer: probe to elicit a response for a typical month; if respondent is not able to provide you with that estimate, then probe for the number of outpatients in a typical year. Specify that this is a full calendar year (i.e. from January to December). Please reiterate to the respondent that the number is both spontaneous and induced abortion patients and should take into consideration all wards of the facility. If a range is given, probe further for an average number]</i></p> | <p><input type="text" value="1"/> Number of outpatients in a <b>typical</b> month <input type="text"/> <input type="text"/> <input type="text"/> <input type="text"/> <input type="text"/></p> <p style="text-align: center;">OR</p> <p><input type="text" value="2"/> Number of outpatients in a <b>typical</b> year <input type="text"/> <input type="text"/> <input type="text"/> <input type="text"/> <input type="text"/></p>                                                                                                                                                                                                                                                                                                                                                                                                                                                                                                                                                                                                                                                                                                                                                                                                                                                                                                                    |                                    |                                |                     |                                |                      |                                |                          |                                |                 |                                |                     |                                |                          |                                |                                |                                |                     |                                |                       |                                 |

|     |                                                                                                                                                                                                                                                                                                                                                                                                                                                                                                                                                                                                                                                                                                                                 |                                                                                                                                                                                                                                                                                                                                                     |
|-----|---------------------------------------------------------------------------------------------------------------------------------------------------------------------------------------------------------------------------------------------------------------------------------------------------------------------------------------------------------------------------------------------------------------------------------------------------------------------------------------------------------------------------------------------------------------------------------------------------------------------------------------------------------------------------------------------------------------------------------|-----------------------------------------------------------------------------------------------------------------------------------------------------------------------------------------------------------------------------------------------------------------------------------------------------------------------------------------------------|
| 205 | <p>In the <b>past month</b>, about how many <b>post-abortion care</b> patients were treated as <b>outpatients</b> in this facility as a whole (please remember to include all <b>post-abortion care patients</b>, whether they are due to spontaneous or induced abortions)</p> <p><i>[ Interviewer: Probe to elicit a response for the past month; if respondent is not able to provide you with that estimate then probe for the number of outpatients during the year 2012. Specify that this is a full calendar year (i.e. from Jan to Dec). Please reiterate to the respondent that the number should take into consideration all wards of the facility. If a range is given, probe further for an average number]</i></p> | <p><input type="checkbox"/> 1 Number of <b>outpatients</b> in the <b>past month</b><br/> <input style="width: 40px; height: 15px;" type="text"/></p> <p style="text-align: center;">OR</p> <p><input type="checkbox"/> 2 Number of <b>outpatients</b> in the <b>past year 2012</b><br/> <input style="width: 40px; height: 15px;" type="text"/></p> |
|-----|---------------------------------------------------------------------------------------------------------------------------------------------------------------------------------------------------------------------------------------------------------------------------------------------------------------------------------------------------------------------------------------------------------------------------------------------------------------------------------------------------------------------------------------------------------------------------------------------------------------------------------------------------------------------------------------------------------------------------------|-----------------------------------------------------------------------------------------------------------------------------------------------------------------------------------------------------------------------------------------------------------------------------------------------------------------------------------------------------|

[IF Q203 INDICATES THAT INPATIENT SERVICES ARE PROVIDED, THEN ANSWER Q206-207 IF NOT, GO TO Q208]

|     |                                                                                                                                                                                                                                                                                                                                                                                                                                                                                                                                                                                                                                                                                                                                                                                          |                                                                                                                                                                                                                                                                                                                                                    |
|-----|------------------------------------------------------------------------------------------------------------------------------------------------------------------------------------------------------------------------------------------------------------------------------------------------------------------------------------------------------------------------------------------------------------------------------------------------------------------------------------------------------------------------------------------------------------------------------------------------------------------------------------------------------------------------------------------------------------------------------------------------------------------------------------------|----------------------------------------------------------------------------------------------------------------------------------------------------------------------------------------------------------------------------------------------------------------------------------------------------------------------------------------------------|
| 206 | <p>During a <b>typical month</b>, about how many such <b>post-abortion care patients</b> would you estimate are treated as <b>inpatients</b> at this facility as a whole? Please remember to include all <b>post-abortion care patients</b> whether they are due to spontaneous or induced abortions</p> <p><i>[Please probe to elicit a response for a typical month; if respondent is not able to provide you with that estimate then probe for the number of inpatient on typical year. Specify that this is a full calendar year (from Jan to Dec). Please reiterate to the respondent that the number is for spontaneous and induced abortion patients, and should in to consideration all wards of the facility. If a range is given, probe further for an average number]</i></p> | <p><input type="checkbox"/> 1 Number of <b>inpatients</b> in an a <b>typical month</b><br/> <input style="width: 40px; height: 15px;" type="text"/></p> <p style="text-align: center;">OR</p> <p><input type="checkbox"/> 2 Number of <b>inpatients</b> in a <b>typical year</b>.<br/> <input style="width: 40px; height: 15px;" type="text"/></p> |
|-----|------------------------------------------------------------------------------------------------------------------------------------------------------------------------------------------------------------------------------------------------------------------------------------------------------------------------------------------------------------------------------------------------------------------------------------------------------------------------------------------------------------------------------------------------------------------------------------------------------------------------------------------------------------------------------------------------------------------------------------------------------------------------------------------|----------------------------------------------------------------------------------------------------------------------------------------------------------------------------------------------------------------------------------------------------------------------------------------------------------------------------------------------------|

|     |                                                                                                                                                                                                                                                                                                                                                                                                                                                                                                                                                                                                                                                          |                                                                                                                                                                                                                                                                                                                                                     |
|-----|----------------------------------------------------------------------------------------------------------------------------------------------------------------------------------------------------------------------------------------------------------------------------------------------------------------------------------------------------------------------------------------------------------------------------------------------------------------------------------------------------------------------------------------------------------------------------------------------------------------------------------------------------------|-----------------------------------------------------------------------------------------------------------------------------------------------------------------------------------------------------------------------------------------------------------------------------------------------------------------------------------------------------|
| 207 | <p>In the <b>past month</b>, about how many <b>post-abortion care patients</b> were treated as <b>inpatients</b> in this facility as a whole? Please remember to include all <b>post-abortion patients</b>, whether they are due to spontaneous or induced abortions</p> <p><i>[Interviewer: Please probe to elicit a response for the past month; if respondent is not able to provide you with that estimate, then probe for the number of inpatients during the year 2012. Please reiterate to the respondents that the number should take consideration all wards of the facility. If a range is given, probe further for an average number]</i></p> | <p><input type="checkbox"/> 1 Number of <b>inpatients</b> in the <b>past month</b><br/> <input style="width: 40px; height: 15px;" type="text"/></p> <p style="text-align: center;">OR</p> <p><input type="checkbox"/> 2 Number of <b>inpatients</b> in the <b>past year (2012)</b><br/> <input style="width: 40px; height: 15px;" type="text"/></p> |
|-----|----------------------------------------------------------------------------------------------------------------------------------------------------------------------------------------------------------------------------------------------------------------------------------------------------------------------------------------------------------------------------------------------------------------------------------------------------------------------------------------------------------------------------------------------------------------------------------------------------------------------------------------------------------|-----------------------------------------------------------------------------------------------------------------------------------------------------------------------------------------------------------------------------------------------------------------------------------------------------------------------------------------------------|

[IF THE RESPONSE FOR Q202A IS "NO," ONLY ASK Q208, Q209 AND Q210, THEN SKIP TO MODULE 4.]

|     |                                                                                                                                                                                                                                                                                                                                                                                                                                                                                                                                                                                                                                                                                                                                                                   |                                                                                                                                                                                                                                                                                                                                                      |
|-----|-------------------------------------------------------------------------------------------------------------------------------------------------------------------------------------------------------------------------------------------------------------------------------------------------------------------------------------------------------------------------------------------------------------------------------------------------------------------------------------------------------------------------------------------------------------------------------------------------------------------------------------------------------------------------------------------------------------------------------------------------------------------|------------------------------------------------------------------------------------------------------------------------------------------------------------------------------------------------------------------------------------------------------------------------------------------------------------------------------------------------------|
| 208 | <p>During a <b>typical month</b>, about how many <b>post-abortion care patients</b> would you estimate are <b>referred</b> from this facility as a whole? Please remember to include all <b>post-abortion care patients</b>, whether they are due to spontaneous or induced abortion.</p> <p><i>[Probe to elicit a response for a typical month; if respondent is not able to provide you with that estimate, then probe for the number of referrals in a typical year. Specify that this is a full calendar year (Jan-Dec). Please reiterate to the respondent that the number is for spontaneous and induced abortion patients, and should take into consideration all wards of the facility. If a range is given, probe further for an average number]</i></p> | <p><input type="checkbox"/> 1 Number of <b>referrals</b> in an <b>typical month</b><br/> <input style="width: 40px; height: 15px;" type="text"/></p> <p style="text-align: center;">OR</p> <p><input type="checkbox"/> 2 Number of <b>referrals</b> in a <b>typical year (2012)</b><br/> <input style="width: 40px; height: 15px;" type="text"/></p> |
|-----|-------------------------------------------------------------------------------------------------------------------------------------------------------------------------------------------------------------------------------------------------------------------------------------------------------------------------------------------------------------------------------------------------------------------------------------------------------------------------------------------------------------------------------------------------------------------------------------------------------------------------------------------------------------------------------------------------------------------------------------------------------------------|------------------------------------------------------------------------------------------------------------------------------------------------------------------------------------------------------------------------------------------------------------------------------------------------------------------------------------------------------|

|                                        |                                                                                                                                                                                                                                                                                                                                                                                                                                                                                                                                                                                                                                                                                                                                                                                                                                                                                                                        |                                                                                                                                                                                                                                                                                                                                                                                                                                                                                                                                                                                                                                                                                                                                                           |                        |                          |                      |                          |                          |   |                           |                          |   |                                                                                                                                                                                                                                                                                                                                                                                                                                                                                                                                                                                                                                                                                                                                                                                                                                                                                                                                                                                                                                                                                                                              |                          |   |                          |                          |                      |                               |                          |   |                        |                          |                      |                       |                          |    |                      |                      |                      |                      |                  |   |                      |                      |                      |                      |                  |   |                      |                      |                      |                      |             |   |                      |                      |                      |                      |
|----------------------------------------|------------------------------------------------------------------------------------------------------------------------------------------------------------------------------------------------------------------------------------------------------------------------------------------------------------------------------------------------------------------------------------------------------------------------------------------------------------------------------------------------------------------------------------------------------------------------------------------------------------------------------------------------------------------------------------------------------------------------------------------------------------------------------------------------------------------------------------------------------------------------------------------------------------------------|-----------------------------------------------------------------------------------------------------------------------------------------------------------------------------------------------------------------------------------------------------------------------------------------------------------------------------------------------------------------------------------------------------------------------------------------------------------------------------------------------------------------------------------------------------------------------------------------------------------------------------------------------------------------------------------------------------------------------------------------------------------|------------------------|--------------------------|----------------------|--------------------------|--------------------------|---|---------------------------|--------------------------|---|------------------------------------------------------------------------------------------------------------------------------------------------------------------------------------------------------------------------------------------------------------------------------------------------------------------------------------------------------------------------------------------------------------------------------------------------------------------------------------------------------------------------------------------------------------------------------------------------------------------------------------------------------------------------------------------------------------------------------------------------------------------------------------------------------------------------------------------------------------------------------------------------------------------------------------------------------------------------------------------------------------------------------------------------------------------------------------------------------------------------------|--------------------------|---|--------------------------|--------------------------|----------------------|-------------------------------|--------------------------|---|------------------------|--------------------------|----------------------|-----------------------|--------------------------|----|----------------------|----------------------|----------------------|----------------------|------------------|---|----------------------|----------------------|----------------------|----------------------|------------------|---|----------------------|----------------------|----------------------|----------------------|-------------|---|----------------------|----------------------|----------------------|----------------------|
| 209                                    | <p>In the <b>past month</b>, about how many <b>post-abortion care patients were referred</b> from this facility as a whole? Please remember to include all <b>post-abortion care patients</b>, whether they are due to complications of spontaneous or induced abortions.</p> <p><i>[Please probe to elicit a response for the past month; if respondent is not able to provide you with that estimate, then probe for the number of referral during the year 2012. Please reiterate to the respondent that the number should take into consideration all wards of the facility. If a range is given, probe further for an average number]</i></p>                                                                                                                                                                                                                                                                     | <p><input type="checkbox"/> 1 Number of <b>referrals</b> in the <b>past month</b><br/> <input type="text"/> <input type="text"/> <input type="text"/> <input type="text"/> <input type="text"/></p> <p>OR</p> <p><input type="checkbox"/> 2 Number of <b>referrals</b> in the <b>past year (2012)</b><br/> <input type="text"/> <input type="text"/> <input type="text"/> <input type="text"/> <input type="text"/></p> <p><i>[IF Q208 AND Q209 BOTH EQUAL 0, SKIP TO 211]</i></p>                                                                                                                                                                                                                                                                        |                        |                          |                      |                          |                          |   |                           |                          |   |                                                                                                                                                                                                                                                                                                                                                                                                                                                                                                                                                                                                                                                                                                                                                                                                                                                                                                                                                                                                                                                                                                                              |                          |   |                          |                          |                      |                               |                          |   |                        |                          |                      |                       |                          |    |                      |                      |                      |                      |                  |   |                      |                      |                      |                      |                  |   |                      |                      |                      |                      |             |   |                      |                      |                      |                      |
| 210                                    | <p>When a PAC case comes in and you determine it's too severe for you to handle, what services do you give before you refer them on?</p> <p><i>[Interviewer: DO NOT PROMPT. Circle all that apply.]</i></p>                                                                                                                                                                                                                                                                                                                                                                                                                                                                                                                                                                                                                                                                                                            | <table border="0"> <tr><td>Stop the bleeding.....</td><td><input type="checkbox"/></td><td>1</td></tr> <tr><td>Provide antibiotics.....</td><td><input type="checkbox"/></td><td>1</td></tr> <tr><td>Provide pain killers.....</td><td><input type="checkbox"/></td><td>1</td></tr> <tr><td>Provide IV fluids for dehydration.....</td><td><input type="checkbox"/></td><td>1</td></tr> <tr><td>Provide counselling.....</td><td><input type="checkbox"/></td><td>1</td></tr> <tr><td>We do not refer patients.....</td><td><input type="checkbox"/></td><td>1</td></tr> <tr><td>None of the above.....</td><td><input type="checkbox"/></td><td>1</td></tr> <tr><td>Other (Specify) _____</td><td><input type="checkbox"/></td><td>96</td></tr> </table> | Stop the bleeding..... | <input type="checkbox"/> | 1                    | Provide antibiotics..... | <input type="checkbox"/> | 1 | Provide pain killers..... | <input type="checkbox"/> | 1 | Provide IV fluids for dehydration.....                                                                                                                                                                                                                                                                                                                                                                                                                                                                                                                                                                                                                                                                                                                                                                                                                                                                                                                                                                                                                                                                                       | <input type="checkbox"/> | 1 | Provide counselling..... | <input type="checkbox"/> | 1                    | We do not refer patients..... | <input type="checkbox"/> | 1 | None of the above..... | <input type="checkbox"/> | 1                    | Other (Specify) _____ | <input type="checkbox"/> | 96 |                      |                      |                      |                      |                  |   |                      |                      |                      |                      |                  |   |                      |                      |                      |                      |             |   |                      |                      |                      |                      |
| Stop the bleeding.....                 | <input type="checkbox"/>                                                                                                                                                                                                                                                                                                                                                                                                                                                                                                                                                                                                                                                                                                                                                                                                                                                                                               | 1                                                                                                                                                                                                                                                                                                                                                                                                                                                                                                                                                                                                                                                                                                                                                         |                        |                          |                      |                          |                          |   |                           |                          |   |                                                                                                                                                                                                                                                                                                                                                                                                                                                                                                                                                                                                                                                                                                                                                                                                                                                                                                                                                                                                                                                                                                                              |                          |   |                          |                          |                      |                               |                          |   |                        |                          |                      |                       |                          |    |                      |                      |                      |                      |                  |   |                      |                      |                      |                      |                  |   |                      |                      |                      |                      |             |   |                      |                      |                      |                      |
| Provide antibiotics.....               | <input type="checkbox"/>                                                                                                                                                                                                                                                                                                                                                                                                                                                                                                                                                                                                                                                                                                                                                                                                                                                                                               | 1                                                                                                                                                                                                                                                                                                                                                                                                                                                                                                                                                                                                                                                                                                                                                         |                        |                          |                      |                          |                          |   |                           |                          |   |                                                                                                                                                                                                                                                                                                                                                                                                                                                                                                                                                                                                                                                                                                                                                                                                                                                                                                                                                                                                                                                                                                                              |                          |   |                          |                          |                      |                               |                          |   |                        |                          |                      |                       |                          |    |                      |                      |                      |                      |                  |   |                      |                      |                      |                      |                  |   |                      |                      |                      |                      |             |   |                      |                      |                      |                      |
| Provide pain killers.....              | <input type="checkbox"/>                                                                                                                                                                                                                                                                                                                                                                                                                                                                                                                                                                                                                                                                                                                                                                                                                                                                                               | 1                                                                                                                                                                                                                                                                                                                                                                                                                                                                                                                                                                                                                                                                                                                                                         |                        |                          |                      |                          |                          |   |                           |                          |   |                                                                                                                                                                                                                                                                                                                                                                                                                                                                                                                                                                                                                                                                                                                                                                                                                                                                                                                                                                                                                                                                                                                              |                          |   |                          |                          |                      |                               |                          |   |                        |                          |                      |                       |                          |    |                      |                      |                      |                      |                  |   |                      |                      |                      |                      |                  |   |                      |                      |                      |                      |             |   |                      |                      |                      |                      |
| Provide IV fluids for dehydration..... | <input type="checkbox"/>                                                                                                                                                                                                                                                                                                                                                                                                                                                                                                                                                                                                                                                                                                                                                                                                                                                                                               | 1                                                                                                                                                                                                                                                                                                                                                                                                                                                                                                                                                                                                                                                                                                                                                         |                        |                          |                      |                          |                          |   |                           |                          |   |                                                                                                                                                                                                                                                                                                                                                                                                                                                                                                                                                                                                                                                                                                                                                                                                                                                                                                                                                                                                                                                                                                                              |                          |   |                          |                          |                      |                               |                          |   |                        |                          |                      |                       |                          |    |                      |                      |                      |                      |                  |   |                      |                      |                      |                      |                  |   |                      |                      |                      |                      |             |   |                      |                      |                      |                      |
| Provide counselling.....               | <input type="checkbox"/>                                                                                                                                                                                                                                                                                                                                                                                                                                                                                                                                                                                                                                                                                                                                                                                                                                                                                               | 1                                                                                                                                                                                                                                                                                                                                                                                                                                                                                                                                                                                                                                                                                                                                                         |                        |                          |                      |                          |                          |   |                           |                          |   |                                                                                                                                                                                                                                                                                                                                                                                                                                                                                                                                                                                                                                                                                                                                                                                                                                                                                                                                                                                                                                                                                                                              |                          |   |                          |                          |                      |                               |                          |   |                        |                          |                      |                       |                          |    |                      |                      |                      |                      |                  |   |                      |                      |                      |                      |                  |   |                      |                      |                      |                      |             |   |                      |                      |                      |                      |
| We do not refer patients.....          | <input type="checkbox"/>                                                                                                                                                                                                                                                                                                                                                                                                                                                                                                                                                                                                                                                                                                                                                                                                                                                                                               | 1                                                                                                                                                                                                                                                                                                                                                                                                                                                                                                                                                                                                                                                                                                                                                         |                        |                          |                      |                          |                          |   |                           |                          |   |                                                                                                                                                                                                                                                                                                                                                                                                                                                                                                                                                                                                                                                                                                                                                                                                                                                                                                                                                                                                                                                                                                                              |                          |   |                          |                          |                      |                               |                          |   |                        |                          |                      |                       |                          |    |                      |                      |                      |                      |                  |   |                      |                      |                      |                      |                  |   |                      |                      |                      |                      |             |   |                      |                      |                      |                      |
| None of the above.....                 | <input type="checkbox"/>                                                                                                                                                                                                                                                                                                                                                                                                                                                                                                                                                                                                                                                                                                                                                                                                                                                                                               | 1                                                                                                                                                                                                                                                                                                                                                                                                                                                                                                                                                                                                                                                                                                                                                         |                        |                          |                      |                          |                          |   |                           |                          |   |                                                                                                                                                                                                                                                                                                                                                                                                                                                                                                                                                                                                                                                                                                                                                                                                                                                                                                                                                                                                                                                                                                                              |                          |   |                          |                          |                      |                               |                          |   |                        |                          |                      |                       |                          |    |                      |                      |                      |                      |                  |   |                      |                      |                      |                      |                  |   |                      |                      |                      |                      |             |   |                      |                      |                      |                      |
| Other (Specify) _____                  | <input type="checkbox"/>                                                                                                                                                                                                                                                                                                                                                                                                                                                                                                                                                                                                                                                                                                                                                                                                                                                                                               | 96                                                                                                                                                                                                                                                                                                                                                                                                                                                                                                                                                                                                                                                                                                                                                        |                        |                          |                      |                          |                          |   |                           |                          |   |                                                                                                                                                                                                                                                                                                                                                                                                                                                                                                                                                                                                                                                                                                                                                                                                                                                                                                                                                                                                                                                                                                                              |                          |   |                          |                          |                      |                               |                          |   |                        |                          |                      |                       |                          |    |                      |                      |                      |                      |                  |   |                      |                      |                      |                      |                  |   |                      |                      |                      |                      |             |   |                      |                      |                      |                      |
| 211                                    | <p>About how many post-abortion care patient referrals do you <b>RECEIVE</b> from other facilities in a typical month?</p>                                                                                                                                                                                                                                                                                                                                                                                                                                                                                                                                                                                                                                                                                                                                                                                             | <p><input type="checkbox"/> 1 Number of <b>referrals received</b> in <b>typical month</b><br/> <input type="text"/> <input type="text"/> <input type="text"/> <input type="text"/></p> <p>OR</p> <p><input type="checkbox"/> 2 Number of <b>referrals received</b> in <b>typical year</b><br/> <input type="text"/> <input type="text"/> <input type="text"/> <input type="text"/></p>                                                                                                                                                                                                                                                                                                                                                                    |                        |                          |                      |                          |                          |   |                           |                          |   |                                                                                                                                                                                                                                                                                                                                                                                                                                                                                                                                                                                                                                                                                                                                                                                                                                                                                                                                                                                                                                                                                                                              |                          |   |                          |                          |                      |                               |                          |   |                        |                          |                      |                       |                          |    |                      |                      |                      |                      |                  |   |                      |                      |                      |                      |                  |   |                      |                      |                      |                      |             |   |                      |                      |                      |                      |
| 212                                    | <p><i>[Interviewer: Refer to the previous figures and fill in below before asking the respondent about the patient totals]</i></p> <p>So to confirm what you have just told me, in a <b>typical month</b> (or year), your facility treated</p> <table border="1" style="display: inline-table; vertical-align: middle;"> <tr><td> </td><td> </td><td> </td><td> </td><td> </td></tr> <tr><td> </td><td> </td><td> </td><td> </td><td> </td></tr> </table> <p style="display: inline-block; vertical-align: middle;">Outpatients<br/>Inpatients</p> <p>for abortion complications?</p> <p><i>[Interviewer: Please read out the total number of spontaneous and induced abortion patients seen at this facility in a typical month (Q204 and Q206)]</i></p> <p>Is this number correct?<br/> <i>[Interviewer: If correct, please insert again at right; if not then correct Q 204 and Q 206 and insert at right.]</i></p> |                                                                                                                                                                                                                                                                                                                                                                                                                                                                                                                                                                                                                                                                                                                                                           |                        |                          |                      |                          |                          |   |                           |                          |   | <p>Summary per <b>month</b></p> <table border="0"> <tr><td>Outpatients.....</td><td>1</td><td><input type="text"/></td><td><input type="text"/></td><td><input type="text"/></td><td><input type="text"/></td></tr> <tr><td>Inpatients:.....</td><td>2</td><td><input type="text"/></td><td><input type="text"/></td><td><input type="text"/></td><td><input type="text"/></td></tr> <tr><td>Total .....</td><td>3</td><td><input type="text"/></td><td><input type="text"/></td><td><input type="text"/></td><td><input type="text"/></td></tr> </table> <p>OR</p> <p>Summary per <b>year</b></p> <table border="0"> <tr><td>Outpatients.....</td><td>1</td><td><input type="text"/></td><td><input type="text"/></td><td><input type="text"/></td><td><input type="text"/></td></tr> <tr><td>Inpatients:.....</td><td>2</td><td><input type="text"/></td><td><input type="text"/></td><td><input type="text"/></td><td><input type="text"/></td></tr> <tr><td>Total .....</td><td>3</td><td><input type="text"/></td><td><input type="text"/></td><td><input type="text"/></td><td><input type="text"/></td></tr> </table> | Outpatients.....         | 1 | <input type="text"/>     | <input type="text"/>     | <input type="text"/> | <input type="text"/>          | Inpatients:.....         | 2 | <input type="text"/>   | <input type="text"/>     | <input type="text"/> | <input type="text"/>  | Total .....              | 3  | <input type="text"/> | <input type="text"/> | <input type="text"/> | <input type="text"/> | Outpatients..... | 1 | <input type="text"/> | <input type="text"/> | <input type="text"/> | <input type="text"/> | Inpatients:..... | 2 | <input type="text"/> | <input type="text"/> | <input type="text"/> | <input type="text"/> | Total ..... | 3 | <input type="text"/> | <input type="text"/> | <input type="text"/> | <input type="text"/> |
|                                        |                                                                                                                                                                                                                                                                                                                                                                                                                                                                                                                                                                                                                                                                                                                                                                                                                                                                                                                        |                                                                                                                                                                                                                                                                                                                                                                                                                                                                                                                                                                                                                                                                                                                                                           |                        |                          |                      |                          |                          |   |                           |                          |   |                                                                                                                                                                                                                                                                                                                                                                                                                                                                                                                                                                                                                                                                                                                                                                                                                                                                                                                                                                                                                                                                                                                              |                          |   |                          |                          |                      |                               |                          |   |                        |                          |                      |                       |                          |    |                      |                      |                      |                      |                  |   |                      |                      |                      |                      |                  |   |                      |                      |                      |                      |             |   |                      |                      |                      |                      |
|                                        |                                                                                                                                                                                                                                                                                                                                                                                                                                                                                                                                                                                                                                                                                                                                                                                                                                                                                                                        |                                                                                                                                                                                                                                                                                                                                                                                                                                                                                                                                                                                                                                                                                                                                                           |                        |                          |                      |                          |                          |   |                           |                          |   |                                                                                                                                                                                                                                                                                                                                                                                                                                                                                                                                                                                                                                                                                                                                                                                                                                                                                                                                                                                                                                                                                                                              |                          |   |                          |                          |                      |                               |                          |   |                        |                          |                      |                       |                          |    |                      |                      |                      |                      |                  |   |                      |                      |                      |                      |                  |   |                      |                      |                      |                      |             |   |                      |                      |                      |                      |
| Outpatients.....                       | 1                                                                                                                                                                                                                                                                                                                                                                                                                                                                                                                                                                                                                                                                                                                                                                                                                                                                                                                      | <input type="text"/>                                                                                                                                                                                                                                                                                                                                                                                                                                                                                                                                                                                                                                                                                                                                      | <input type="text"/>   | <input type="text"/>     | <input type="text"/> |                          |                          |   |                           |                          |   |                                                                                                                                                                                                                                                                                                                                                                                                                                                                                                                                                                                                                                                                                                                                                                                                                                                                                                                                                                                                                                                                                                                              |                          |   |                          |                          |                      |                               |                          |   |                        |                          |                      |                       |                          |    |                      |                      |                      |                      |                  |   |                      |                      |                      |                      |                  |   |                      |                      |                      |                      |             |   |                      |                      |                      |                      |
| Inpatients:.....                       | 2                                                                                                                                                                                                                                                                                                                                                                                                                                                                                                                                                                                                                                                                                                                                                                                                                                                                                                                      | <input type="text"/>                                                                                                                                                                                                                                                                                                                                                                                                                                                                                                                                                                                                                                                                                                                                      | <input type="text"/>   | <input type="text"/>     | <input type="text"/> |                          |                          |   |                           |                          |   |                                                                                                                                                                                                                                                                                                                                                                                                                                                                                                                                                                                                                                                                                                                                                                                                                                                                                                                                                                                                                                                                                                                              |                          |   |                          |                          |                      |                               |                          |   |                        |                          |                      |                       |                          |    |                      |                      |                      |                      |                  |   |                      |                      |                      |                      |                  |   |                      |                      |                      |                      |             |   |                      |                      |                      |                      |
| Total .....                            | 3                                                                                                                                                                                                                                                                                                                                                                                                                                                                                                                                                                                                                                                                                                                                                                                                                                                                                                                      | <input type="text"/>                                                                                                                                                                                                                                                                                                                                                                                                                                                                                                                                                                                                                                                                                                                                      | <input type="text"/>   | <input type="text"/>     | <input type="text"/> |                          |                          |   |                           |                          |   |                                                                                                                                                                                                                                                                                                                                                                                                                                                                                                                                                                                                                                                                                                                                                                                                                                                                                                                                                                                                                                                                                                                              |                          |   |                          |                          |                      |                               |                          |   |                        |                          |                      |                       |                          |    |                      |                      |                      |                      |                  |   |                      |                      |                      |                      |                  |   |                      |                      |                      |                      |             |   |                      |                      |                      |                      |
| Outpatients.....                       | 1                                                                                                                                                                                                                                                                                                                                                                                                                                                                                                                                                                                                                                                                                                                                                                                                                                                                                                                      | <input type="text"/>                                                                                                                                                                                                                                                                                                                                                                                                                                                                                                                                                                                                                                                                                                                                      | <input type="text"/>   | <input type="text"/>     | <input type="text"/> |                          |                          |   |                           |                          |   |                                                                                                                                                                                                                                                                                                                                                                                                                                                                                                                                                                                                                                                                                                                                                                                                                                                                                                                                                                                                                                                                                                                              |                          |   |                          |                          |                      |                               |                          |   |                        |                          |                      |                       |                          |    |                      |                      |                      |                      |                  |   |                      |                      |                      |                      |                  |   |                      |                      |                      |                      |             |   |                      |                      |                      |                      |
| Inpatients:.....                       | 2                                                                                                                                                                                                                                                                                                                                                                                                                                                                                                                                                                                                                                                                                                                                                                                                                                                                                                                      | <input type="text"/>                                                                                                                                                                                                                                                                                                                                                                                                                                                                                                                                                                                                                                                                                                                                      | <input type="text"/>   | <input type="text"/>     | <input type="text"/> |                          |                          |   |                           |                          |   |                                                                                                                                                                                                                                                                                                                                                                                                                                                                                                                                                                                                                                                                                                                                                                                                                                                                                                                                                                                                                                                                                                                              |                          |   |                          |                          |                      |                               |                          |   |                        |                          |                      |                       |                          |    |                      |                      |                      |                      |                  |   |                      |                      |                      |                      |                  |   |                      |                      |                      |                      |             |   |                      |                      |                      |                      |
| Total .....                            | 3                                                                                                                                                                                                                                                                                                                                                                                                                                                                                                                                                                                                                                                                                                                                                                                                                                                                                                                      | <input type="text"/>                                                                                                                                                                                                                                                                                                                                                                                                                                                                                                                                                                                                                                                                                                                                      | <input type="text"/>   | <input type="text"/>     | <input type="text"/> |                          |                          |   |                           |                          |   |                                                                                                                                                                                                                                                                                                                                                                                                                                                                                                                                                                                                                                                                                                                                                                                                                                                                                                                                                                                                                                                                                                                              |                          |   |                          |                          |                      |                               |                          |   |                        |                          |                      |                       |                          |    |                      |                      |                      |                      |                  |   |                      |                      |                      |                      |                  |   |                      |                      |                      |                      |             |   |                      |                      |                      |                      |

| 213                                                                                                                                                | <p><b>[Interviewer: Refer to the previous figures and fill in below before asking the respondent about the patient totals].</b></p> <p>So to confirm what you have just told me, in the <b>past month</b> (or <b>during the year 2012</b>) your facility treated:</p> <table style="margin-left: 20px; border-collapse: collapse;"> <tr> <td style="border: 1px solid black; width: 20px; height: 15px;"></td> <td style="border: 1px solid black; width: 20px; height: 15px;"></td> <td style="border: 1px solid black; width: 20px; height: 15px;"></td> <td style="border: 1px solid black; width: 20px; height: 15px;"></td> <td style="border: 1px solid black; width: 20px; height: 15px;"></td> <td style="padding-left: 5px;">Outpatients</td> </tr> <tr> <td style="border: 1px solid black; width: 20px; height: 15px;"></td> <td style="border: 1px solid black; width: 20px; height: 15px;"></td> <td style="border: 1px solid black; width: 20px; height: 15px;"></td> <td style="border: 1px solid black; width: 20px; height: 15px;"></td> <td style="border: 1px solid black; width: 20px; height: 15px;"></td> <td style="padding-left: 5px;">Inpatients</td> </tr> </table> <p>for post-abortions complications?</p> <p><b>[Interviewer: Read out the total number of spontaneous and induced abortion patients seen at this facility in the past month (Q 205 and Q 207)].</b></p> <p>Is this number correct?<br/> <b>[Interviewer: If correct, please insert again at right; if not then correct Q 205 and Q 207 and insert at right.]</b></p> |                                                                                                                                                                                                                                                                                                                                                                                                                                                                                                                                                                                                                                                                                                                                                                                                                                                                                                                                                                                                                                                                                                                                                                                                                                                                                               |                                      |               |                                     |   | Outpatients                         |   |                                       |        |                                                  |   | Inpatients            | <p>Summary in the <b>past month</b></p> <p>Outpatients..... 1 <table border="1" style="display: inline-table; border-collapse: collapse;"><tr><td style="width: 20px; height: 15px;"></td><td style="width: 20px; height: 15px;"></td><td style="width: 20px; height: 15px;"></td><td style="width: 20px; height: 15px;"></td><td style="width: 20px; height: 15px;"></td></tr></table></p> <p>Inpatients:..... 2 <table border="1" style="display: inline-table; border-collapse: collapse;"><tr><td style="width: 20px; height: 15px;"></td><td style="width: 20px; height: 15px;"></td><td style="width: 20px; height: 15px;"></td><td style="width: 20px; height: 15px;"></td><td style="width: 20px; height: 15px;"></td></tr></table></p> <p>Total ..... 3 <table border="1" style="display: inline-table; border-collapse: collapse;"><tr><td style="width: 20px; height: 15px;"></td><td style="width: 20px; height: 15px;"></td><td style="width: 20px; height: 15px;"></td><td style="width: 20px; height: 15px;"></td><td style="width: 20px; height: 15px;"></td></tr></table></p> <p style="text-align: center;"><b>OR</b></p> <p>Summary in the <b>past year (2012)</b></p> <p>Outpatients..... 1 <table border="1" style="display: inline-table; border-collapse: collapse;"><tr><td style="width: 20px; height: 15px;"></td><td style="width: 20px; height: 15px;"></td><td style="width: 20px; height: 15px;"></td><td style="width: 20px; height: 15px;"></td><td style="width: 20px; height: 15px;"></td></tr></table></p> <p>Inpatients:..... 2 <table border="1" style="display: inline-table; border-collapse: collapse;"><tr><td style="width: 20px; height: 15px;"></td><td style="width: 20px; height: 15px;"></td><td style="width: 20px; height: 15px;"></td><td style="width: 20px; height: 15px;"></td><td style="width: 20px; height: 15px;"></td></tr></table></p> <p>Total ..... 3 <table border="1" style="display: inline-table; border-collapse: collapse;"><tr><td style="width: 20px; height: 15px;"></td><td style="width: 20px; height: 15px;"></td><td style="width: 20px; height: 15px;"></td><td style="width: 20px; height: 15px;"></td><td style="width: 20px; height: 15px;"></td></tr></table></p> |                       |            |      |   |                     |  |   |                              |  |   |                |  |   |                   |  |    |                  |  |  |  |  |  |  |  |  |  |  |  |  |  |
|----------------------------------------------------------------------------------------------------------------------------------------------------|--------------------------------------------------------------------------------------------------------------------------------------------------------------------------------------------------------------------------------------------------------------------------------------------------------------------------------------------------------------------------------------------------------------------------------------------------------------------------------------------------------------------------------------------------------------------------------------------------------------------------------------------------------------------------------------------------------------------------------------------------------------------------------------------------------------------------------------------------------------------------------------------------------------------------------------------------------------------------------------------------------------------------------------------------------------------------------------------------------------------------------------------------------------------------------------------------------------------------------------------------------------------------------------------------------------------------------------------------------------------------------------------------------------------------------------------------------------------------------------------------------------------------------------------------------------------|-----------------------------------------------------------------------------------------------------------------------------------------------------------------------------------------------------------------------------------------------------------------------------------------------------------------------------------------------------------------------------------------------------------------------------------------------------------------------------------------------------------------------------------------------------------------------------------------------------------------------------------------------------------------------------------------------------------------------------------------------------------------------------------------------------------------------------------------------------------------------------------------------------------------------------------------------------------------------------------------------------------------------------------------------------------------------------------------------------------------------------------------------------------------------------------------------------------------------------------------------------------------------------------------------|--------------------------------------|---------------|-------------------------------------|---|-------------------------------------|---|---------------------------------------|--------|--------------------------------------------------|---|-----------------------|--------------------------------------------------------------------------------------------------------------------------------------------------------------------------------------------------------------------------------------------------------------------------------------------------------------------------------------------------------------------------------------------------------------------------------------------------------------------------------------------------------------------------------------------------------------------------------------------------------------------------------------------------------------------------------------------------------------------------------------------------------------------------------------------------------------------------------------------------------------------------------------------------------------------------------------------------------------------------------------------------------------------------------------------------------------------------------------------------------------------------------------------------------------------------------------------------------------------------------------------------------------------------------------------------------------------------------------------------------------------------------------------------------------------------------------------------------------------------------------------------------------------------------------------------------------------------------------------------------------------------------------------------------------------------------------------------------------------------------------------------------------------------------------------------------------------------------------------------------------------------------------------------------------------------------------------------------------------------------------------------------------------------------------------------------------------------------------------------------------------------------------------------------------------------------------------------------------------------------------------------|-----------------------|------------|------|---|---------------------|--|---|------------------------------|--|---|----------------|--|---|-------------------|--|----|------------------|--|--|--|--|--|--|--|--|--|--|--|--|--|
|                                                                                                                                                    |                                                                                                                                                                                                                                                                                                                                                                                                                                                                                                                                                                                                                                                                                                                                                                                                                                                                                                                                                                                                                                                                                                                                                                                                                                                                                                                                                                                                                                                                                                                                                                    |                                                                                                                                                                                                                                                                                                                                                                                                                                                                                                                                                                                                                                                                                                                                                                                                                                                                                                                                                                                                                                                                                                                                                                                                                                                                                               |                                      |               | Outpatients                         |   |                                     |   |                                       |        |                                                  |   |                       |                                                                                                                                                                                                                                                                                                                                                                                                                                                                                                                                                                                                                                                                                                                                                                                                                                                                                                                                                                                                                                                                                                                                                                                                                                                                                                                                                                                                                                                                                                                                                                                                                                                                                                                                                                                                                                                                                                                                                                                                                                                                                                                                                                                                                                                  |                       |            |      |   |                     |  |   |                              |  |   |                |  |   |                   |  |    |                  |  |  |  |  |  |  |  |  |  |  |  |  |  |
|                                                                                                                                                    |                                                                                                                                                                                                                                                                                                                                                                                                                                                                                                                                                                                                                                                                                                                                                                                                                                                                                                                                                                                                                                                                                                                                                                                                                                                                                                                                                                                                                                                                                                                                                                    |                                                                                                                                                                                                                                                                                                                                                                                                                                                                                                                                                                                                                                                                                                                                                                                                                                                                                                                                                                                                                                                                                                                                                                                                                                                                                               |                                      |               | Inpatients                          |   |                                     |   |                                       |        |                                                  |   |                       |                                                                                                                                                                                                                                                                                                                                                                                                                                                                                                                                                                                                                                                                                                                                                                                                                                                                                                                                                                                                                                                                                                                                                                                                                                                                                                                                                                                                                                                                                                                                                                                                                                                                                                                                                                                                                                                                                                                                                                                                                                                                                                                                                                                                                                                  |                       |            |      |   |                     |  |   |                              |  |   |                |  |   |                   |  |    |                  |  |  |  |  |  |  |  |  |  |  |  |  |  |
|                                                                                                                                                    |                                                                                                                                                                                                                                                                                                                                                                                                                                                                                                                                                                                                                                                                                                                                                                                                                                                                                                                                                                                                                                                                                                                                                                                                                                                                                                                                                                                                                                                                                                                                                                    |                                                                                                                                                                                                                                                                                                                                                                                                                                                                                                                                                                                                                                                                                                                                                                                                                                                                                                                                                                                                                                                                                                                                                                                                                                                                                               |                                      |               |                                     |   |                                     |   |                                       |        |                                                  |   |                       |                                                                                                                                                                                                                                                                                                                                                                                                                                                                                                                                                                                                                                                                                                                                                                                                                                                                                                                                                                                                                                                                                                                                                                                                                                                                                                                                                                                                                                                                                                                                                                                                                                                                                                                                                                                                                                                                                                                                                                                                                                                                                                                                                                                                                                                  |                       |            |      |   |                     |  |   |                              |  |   |                |  |   |                   |  |    |                  |  |  |  |  |  |  |  |  |  |  |  |  |  |
|                                                                                                                                                    |                                                                                                                                                                                                                                                                                                                                                                                                                                                                                                                                                                                                                                                                                                                                                                                                                                                                                                                                                                                                                                                                                                                                                                                                                                                                                                                                                                                                                                                                                                                                                                    |                                                                                                                                                                                                                                                                                                                                                                                                                                                                                                                                                                                                                                                                                                                                                                                                                                                                                                                                                                                                                                                                                                                                                                                                                                                                                               |                                      |               |                                     |   |                                     |   |                                       |        |                                                  |   |                       |                                                                                                                                                                                                                                                                                                                                                                                                                                                                                                                                                                                                                                                                                                                                                                                                                                                                                                                                                                                                                                                                                                                                                                                                                                                                                                                                                                                                                                                                                                                                                                                                                                                                                                                                                                                                                                                                                                                                                                                                                                                                                                                                                                                                                                                  |                       |            |      |   |                     |  |   |                              |  |   |                |  |   |                   |  |    |                  |  |  |  |  |  |  |  |  |  |  |  |  |  |
|                                                                                                                                                    |                                                                                                                                                                                                                                                                                                                                                                                                                                                                                                                                                                                                                                                                                                                                                                                                                                                                                                                                                                                                                                                                                                                                                                                                                                                                                                                                                                                                                                                                                                                                                                    |                                                                                                                                                                                                                                                                                                                                                                                                                                                                                                                                                                                                                                                                                                                                                                                                                                                                                                                                                                                                                                                                                                                                                                                                                                                                                               |                                      |               |                                     |   |                                     |   |                                       |        |                                                  |   |                       |                                                                                                                                                                                                                                                                                                                                                                                                                                                                                                                                                                                                                                                                                                                                                                                                                                                                                                                                                                                                                                                                                                                                                                                                                                                                                                                                                                                                                                                                                                                                                                                                                                                                                                                                                                                                                                                                                                                                                                                                                                                                                                                                                                                                                                                  |                       |            |      |   |                     |  |   |                              |  |   |                |  |   |                   |  |    |                  |  |  |  |  |  |  |  |  |  |  |  |  |  |
|                                                                                                                                                    |                                                                                                                                                                                                                                                                                                                                                                                                                                                                                                                                                                                                                                                                                                                                                                                                                                                                                                                                                                                                                                                                                                                                                                                                                                                                                                                                                                                                                                                                                                                                                                    |                                                                                                                                                                                                                                                                                                                                                                                                                                                                                                                                                                                                                                                                                                                                                                                                                                                                                                                                                                                                                                                                                                                                                                                                                                                                                               |                                      |               |                                     |   |                                     |   |                                       |        |                                                  |   |                       |                                                                                                                                                                                                                                                                                                                                                                                                                                                                                                                                                                                                                                                                                                                                                                                                                                                                                                                                                                                                                                                                                                                                                                                                                                                                                                                                                                                                                                                                                                                                                                                                                                                                                                                                                                                                                                                                                                                                                                                                                                                                                                                                                                                                                                                  |                       |            |      |   |                     |  |   |                              |  |   |                |  |   |                   |  |    |                  |  |  |  |  |  |  |  |  |  |  |  |  |  |
|                                                                                                                                                    |                                                                                                                                                                                                                                                                                                                                                                                                                                                                                                                                                                                                                                                                                                                                                                                                                                                                                                                                                                                                                                                                                                                                                                                                                                                                                                                                                                                                                                                                                                                                                                    |                                                                                                                                                                                                                                                                                                                                                                                                                                                                                                                                                                                                                                                                                                                                                                                                                                                                                                                                                                                                                                                                                                                                                                                                                                                                                               |                                      |               |                                     |   |                                     |   |                                       |        |                                                  |   |                       |                                                                                                                                                                                                                                                                                                                                                                                                                                                                                                                                                                                                                                                                                                                                                                                                                                                                                                                                                                                                                                                                                                                                                                                                                                                                                                                                                                                                                                                                                                                                                                                                                                                                                                                                                                                                                                                                                                                                                                                                                                                                                                                                                                                                                                                  |                       |            |      |   |                     |  |   |                              |  |   |                |  |   |                   |  |    |                  |  |  |  |  |  |  |  |  |  |  |  |  |  |
|                                                                                                                                                    |                                                                                                                                                                                                                                                                                                                                                                                                                                                                                                                                                                                                                                                                                                                                                                                                                                                                                                                                                                                                                                                                                                                                                                                                                                                                                                                                                                                                                                                                                                                                                                    |                                                                                                                                                                                                                                                                                                                                                                                                                                                                                                                                                                                                                                                                                                                                                                                                                                                                                                                                                                                                                                                                                                                                                                                                                                                                                               |                                      |               |                                     |   |                                     |   |                                       |        |                                                  |   |                       |                                                                                                                                                                                                                                                                                                                                                                                                                                                                                                                                                                                                                                                                                                                                                                                                                                                                                                                                                                                                                                                                                                                                                                                                                                                                                                                                                                                                                                                                                                                                                                                                                                                                                                                                                                                                                                                                                                                                                                                                                                                                                                                                                                                                                                                  |                       |            |      |   |                     |  |   |                              |  |   |                |  |   |                   |  |    |                  |  |  |  |  |  |  |  |  |  |  |  |  |  |
| 214                                                                                                                                                | <p>What are the various procedures and measures used to treat abortion-complication patients at this facility?</p> <p><b>[Interviewer: Circle all applicable responses. DO NOT PROMPT respondent but probe to make sure you've captured all procedure types.] Ask is there any other procedure?</b></p>                                                                                                                                                                                                                                                                                                                                                                                                                                                                                                                                                                                                                                                                                                                                                                                                                                                                                                                                                                                                                                                                                                                                                                                                                                                            | <table style="width: 100%; border-collapse: collapse;"> <tr><td style="width: 80%;">D &amp; E (dilation and evacuation).....</td><td style="border: 1px solid black; text-align: center;">1</td></tr> <tr><td>D &amp; C (dilation and curettage).....</td><td style="border: 1px solid black; text-align: center;">1</td></tr> <tr><td>MVA (manual vacuum aspiration).....</td><td style="border: 1px solid black; text-align: center;">1</td></tr> <tr><td>EVA (electric vacuum aspiration).....</td><td style="border: 1px solid black; text-align: center;">1</td></tr> <tr><td>Medical abortion (e.g. Cytotec/misoprostol).....</td><td style="border: 1px solid black; text-align: center;">1</td></tr> <tr><td>None.....</td><td style="border: 1px solid black; text-align: center;">1</td></tr> <tr><td>Other (specify) _____</td><td style="border: 1px solid black; text-align: center;">96</td></tr> </table>                                                                                                                                                                                                                                                                                                                                                                      | D & E (dilation and evacuation)..... | 1             | D & C (dilation and curettage)..... | 1 | MVA (manual vacuum aspiration)..... | 1 | EVA (electric vacuum aspiration)..... | 1      | Medical abortion (e.g. Cytotec/misoprostol)..... | 1 | None.....             | 1                                                                                                                                                                                                                                                                                                                                                                                                                                                                                                                                                                                                                                                                                                                                                                                                                                                                                                                                                                                                                                                                                                                                                                                                                                                                                                                                                                                                                                                                                                                                                                                                                                                                                                                                                                                                                                                                                                                                                                                                                                                                                                                                                                                                                                                | Other (specify) _____ | 96         |      |   |                     |  |   |                              |  |   |                |  |   |                   |  |    |                  |  |  |  |  |  |  |  |  |  |  |  |  |  |
| D & E (dilation and evacuation).....                                                                                                               | 1                                                                                                                                                                                                                                                                                                                                                                                                                                                                                                                                                                                                                                                                                                                                                                                                                                                                                                                                                                                                                                                                                                                                                                                                                                                                                                                                                                                                                                                                                                                                                                  |                                                                                                                                                                                                                                                                                                                                                                                                                                                                                                                                                                                                                                                                                                                                                                                                                                                                                                                                                                                                                                                                                                                                                                                                                                                                                               |                                      |               |                                     |   |                                     |   |                                       |        |                                                  |   |                       |                                                                                                                                                                                                                                                                                                                                                                                                                                                                                                                                                                                                                                                                                                                                                                                                                                                                                                                                                                                                                                                                                                                                                                                                                                                                                                                                                                                                                                                                                                                                                                                                                                                                                                                                                                                                                                                                                                                                                                                                                                                                                                                                                                                                                                                  |                       |            |      |   |                     |  |   |                              |  |   |                |  |   |                   |  |    |                  |  |  |  |  |  |  |  |  |  |  |  |  |  |
| D & C (dilation and curettage).....                                                                                                                | 1                                                                                                                                                                                                                                                                                                                                                                                                                                                                                                                                                                                                                                                                                                                                                                                                                                                                                                                                                                                                                                                                                                                                                                                                                                                                                                                                                                                                                                                                                                                                                                  |                                                                                                                                                                                                                                                                                                                                                                                                                                                                                                                                                                                                                                                                                                                                                                                                                                                                                                                                                                                                                                                                                                                                                                                                                                                                                               |                                      |               |                                     |   |                                     |   |                                       |        |                                                  |   |                       |                                                                                                                                                                                                                                                                                                                                                                                                                                                                                                                                                                                                                                                                                                                                                                                                                                                                                                                                                                                                                                                                                                                                                                                                                                                                                                                                                                                                                                                                                                                                                                                                                                                                                                                                                                                                                                                                                                                                                                                                                                                                                                                                                                                                                                                  |                       |            |      |   |                     |  |   |                              |  |   |                |  |   |                   |  |    |                  |  |  |  |  |  |  |  |  |  |  |  |  |  |
| MVA (manual vacuum aspiration).....                                                                                                                | 1                                                                                                                                                                                                                                                                                                                                                                                                                                                                                                                                                                                                                                                                                                                                                                                                                                                                                                                                                                                                                                                                                                                                                                                                                                                                                                                                                                                                                                                                                                                                                                  |                                                                                                                                                                                                                                                                                                                                                                                                                                                                                                                                                                                                                                                                                                                                                                                                                                                                                                                                                                                                                                                                                                                                                                                                                                                                                               |                                      |               |                                     |   |                                     |   |                                       |        |                                                  |   |                       |                                                                                                                                                                                                                                                                                                                                                                                                                                                                                                                                                                                                                                                                                                                                                                                                                                                                                                                                                                                                                                                                                                                                                                                                                                                                                                                                                                                                                                                                                                                                                                                                                                                                                                                                                                                                                                                                                                                                                                                                                                                                                                                                                                                                                                                  |                       |            |      |   |                     |  |   |                              |  |   |                |  |   |                   |  |    |                  |  |  |  |  |  |  |  |  |  |  |  |  |  |
| EVA (electric vacuum aspiration).....                                                                                                              | 1                                                                                                                                                                                                                                                                                                                                                                                                                                                                                                                                                                                                                                                                                                                                                                                                                                                                                                                                                                                                                                                                                                                                                                                                                                                                                                                                                                                                                                                                                                                                                                  |                                                                                                                                                                                                                                                                                                                                                                                                                                                                                                                                                                                                                                                                                                                                                                                                                                                                                                                                                                                                                                                                                                                                                                                                                                                                                               |                                      |               |                                     |   |                                     |   |                                       |        |                                                  |   |                       |                                                                                                                                                                                                                                                                                                                                                                                                                                                                                                                                                                                                                                                                                                                                                                                                                                                                                                                                                                                                                                                                                                                                                                                                                                                                                                                                                                                                                                                                                                                                                                                                                                                                                                                                                                                                                                                                                                                                                                                                                                                                                                                                                                                                                                                  |                       |            |      |   |                     |  |   |                              |  |   |                |  |   |                   |  |    |                  |  |  |  |  |  |  |  |  |  |  |  |  |  |
| Medical abortion (e.g. Cytotec/misoprostol).....                                                                                                   | 1                                                                                                                                                                                                                                                                                                                                                                                                                                                                                                                                                                                                                                                                                                                                                                                                                                                                                                                                                                                                                                                                                                                                                                                                                                                                                                                                                                                                                                                                                                                                                                  |                                                                                                                                                                                                                                                                                                                                                                                                                                                                                                                                                                                                                                                                                                                                                                                                                                                                                                                                                                                                                                                                                                                                                                                                                                                                                               |                                      |               |                                     |   |                                     |   |                                       |        |                                                  |   |                       |                                                                                                                                                                                                                                                                                                                                                                                                                                                                                                                                                                                                                                                                                                                                                                                                                                                                                                                                                                                                                                                                                                                                                                                                                                                                                                                                                                                                                                                                                                                                                                                                                                                                                                                                                                                                                                                                                                                                                                                                                                                                                                                                                                                                                                                  |                       |            |      |   |                     |  |   |                              |  |   |                |  |   |                   |  |    |                  |  |  |  |  |  |  |  |  |  |  |  |  |  |
| None.....                                                                                                                                          | 1                                                                                                                                                                                                                                                                                                                                                                                                                                                                                                                                                                                                                                                                                                                                                                                                                                                                                                                                                                                                                                                                                                                                                                                                                                                                                                                                                                                                                                                                                                                                                                  |                                                                                                                                                                                                                                                                                                                                                                                                                                                                                                                                                                                                                                                                                                                                                                                                                                                                                                                                                                                                                                                                                                                                                                                                                                                                                               |                                      |               |                                     |   |                                     |   |                                       |        |                                                  |   |                       |                                                                                                                                                                                                                                                                                                                                                                                                                                                                                                                                                                                                                                                                                                                                                                                                                                                                                                                                                                                                                                                                                                                                                                                                                                                                                                                                                                                                                                                                                                                                                                                                                                                                                                                                                                                                                                                                                                                                                                                                                                                                                                                                                                                                                                                  |                       |            |      |   |                     |  |   |                              |  |   |                |  |   |                   |  |    |                  |  |  |  |  |  |  |  |  |  |  |  |  |  |
| Other (specify) _____                                                                                                                              | 96                                                                                                                                                                                                                                                                                                                                                                                                                                                                                                                                                                                                                                                                                                                                                                                                                                                                                                                                                                                                                                                                                                                                                                                                                                                                                                                                                                                                                                                                                                                                                                 |                                                                                                                                                                                                                                                                                                                                                                                                                                                                                                                                                                                                                                                                                                                                                                                                                                                                                                                                                                                                                                                                                                                                                                                                                                                                                               |                                      |               |                                     |   |                                     |   |                                       |        |                                                  |   |                       |                                                                                                                                                                                                                                                                                                                                                                                                                                                                                                                                                                                                                                                                                                                                                                                                                                                                                                                                                                                                                                                                                                                                                                                                                                                                                                                                                                                                                                                                                                                                                                                                                                                                                                                                                                                                                                                                                                                                                                                                                                                                                                                                                                                                                                                  |                       |            |      |   |                     |  |   |                              |  |   |                |  |   |                   |  |    |                  |  |  |  |  |  |  |  |  |  |  |  |  |  |
| 215                                                                                                                                                | <p>Of these procedures, which is the <b>most commonly used</b> for treating patients with abortion complication at this facility?</p> <p><b>[Interviewer: Circle only one answer]</b></p>                                                                                                                                                                                                                                                                                                                                                                                                                                                                                                                                                                                                                                                                                                                                                                                                                                                                                                                                                                                                                                                                                                                                                                                                                                                                                                                                                                          | <table style="width: 100%; border-collapse: collapse;"> <tr><td style="width: 80%;">D &amp; E (dilation and evacuation).....</td><td style="border: 1px solid black; text-align: center;">1</td></tr> <tr><td>D &amp; C (dilation and curettage).....</td><td style="border: 1px solid black; text-align: center;">2</td></tr> <tr><td>MVA (manual vacuum aspiration).....</td><td style="border: 1px solid black; text-align: center;">3</td></tr> <tr><td>EVA (electric vacuum aspiration).....</td><td style="border: 1px solid black; text-align: center;">4</td></tr> <tr><td>Medical abortion (e.g. Cytotec/misoprostol).....</td><td style="border: 1px solid black; text-align: center;">5</td></tr> <tr><td>Other (specify) _____</td><td style="border: 1px solid black; text-align: center;">96</td></tr> <tr><td>Not applicable.....</td><td style="border: 1px solid black; text-align: center;">99</td></tr> </table>                                                                                                                                                                                                                                                                                                                                                           | D & E (dilation and evacuation)..... | 1             | D & C (dilation and curettage)..... | 2 | MVA (manual vacuum aspiration)..... | 3 | EVA (electric vacuum aspiration)..... | 4      | Medical abortion (e.g. Cytotec/misoprostol)..... | 5 | Other (specify) _____ | 96                                                                                                                                                                                                                                                                                                                                                                                                                                                                                                                                                                                                                                                                                                                                                                                                                                                                                                                                                                                                                                                                                                                                                                                                                                                                                                                                                                                                                                                                                                                                                                                                                                                                                                                                                                                                                                                                                                                                                                                                                                                                                                                                                                                                                                               | Not applicable.....   | 99         |      |   |                     |  |   |                              |  |   |                |  |   |                   |  |    |                  |  |  |  |  |  |  |  |  |  |  |  |  |  |
| D & E (dilation and evacuation).....                                                                                                               | 1                                                                                                                                                                                                                                                                                                                                                                                                                                                                                                                                                                                                                                                                                                                                                                                                                                                                                                                                                                                                                                                                                                                                                                                                                                                                                                                                                                                                                                                                                                                                                                  |                                                                                                                                                                                                                                                                                                                                                                                                                                                                                                                                                                                                                                                                                                                                                                                                                                                                                                                                                                                                                                                                                                                                                                                                                                                                                               |                                      |               |                                     |   |                                     |   |                                       |        |                                                  |   |                       |                                                                                                                                                                                                                                                                                                                                                                                                                                                                                                                                                                                                                                                                                                                                                                                                                                                                                                                                                                                                                                                                                                                                                                                                                                                                                                                                                                                                                                                                                                                                                                                                                                                                                                                                                                                                                                                                                                                                                                                                                                                                                                                                                                                                                                                  |                       |            |      |   |                     |  |   |                              |  |   |                |  |   |                   |  |    |                  |  |  |  |  |  |  |  |  |  |  |  |  |  |
| D & C (dilation and curettage).....                                                                                                                | 2                                                                                                                                                                                                                                                                                                                                                                                                                                                                                                                                                                                                                                                                                                                                                                                                                                                                                                                                                                                                                                                                                                                                                                                                                                                                                                                                                                                                                                                                                                                                                                  |                                                                                                                                                                                                                                                                                                                                                                                                                                                                                                                                                                                                                                                                                                                                                                                                                                                                                                                                                                                                                                                                                                                                                                                                                                                                                               |                                      |               |                                     |   |                                     |   |                                       |        |                                                  |   |                       |                                                                                                                                                                                                                                                                                                                                                                                                                                                                                                                                                                                                                                                                                                                                                                                                                                                                                                                                                                                                                                                                                                                                                                                                                                                                                                                                                                                                                                                                                                                                                                                                                                                                                                                                                                                                                                                                                                                                                                                                                                                                                                                                                                                                                                                  |                       |            |      |   |                     |  |   |                              |  |   |                |  |   |                   |  |    |                  |  |  |  |  |  |  |  |  |  |  |  |  |  |
| MVA (manual vacuum aspiration).....                                                                                                                | 3                                                                                                                                                                                                                                                                                                                                                                                                                                                                                                                                                                                                                                                                                                                                                                                                                                                                                                                                                                                                                                                                                                                                                                                                                                                                                                                                                                                                                                                                                                                                                                  |                                                                                                                                                                                                                                                                                                                                                                                                                                                                                                                                                                                                                                                                                                                                                                                                                                                                                                                                                                                                                                                                                                                                                                                                                                                                                               |                                      |               |                                     |   |                                     |   |                                       |        |                                                  |   |                       |                                                                                                                                                                                                                                                                                                                                                                                                                                                                                                                                                                                                                                                                                                                                                                                                                                                                                                                                                                                                                                                                                                                                                                                                                                                                                                                                                                                                                                                                                                                                                                                                                                                                                                                                                                                                                                                                                                                                                                                                                                                                                                                                                                                                                                                  |                       |            |      |   |                     |  |   |                              |  |   |                |  |   |                   |  |    |                  |  |  |  |  |  |  |  |  |  |  |  |  |  |
| EVA (electric vacuum aspiration).....                                                                                                              | 4                                                                                                                                                                                                                                                                                                                                                                                                                                                                                                                                                                                                                                                                                                                                                                                                                                                                                                                                                                                                                                                                                                                                                                                                                                                                                                                                                                                                                                                                                                                                                                  |                                                                                                                                                                                                                                                                                                                                                                                                                                                                                                                                                                                                                                                                                                                                                                                                                                                                                                                                                                                                                                                                                                                                                                                                                                                                                               |                                      |               |                                     |   |                                     |   |                                       |        |                                                  |   |                       |                                                                                                                                                                                                                                                                                                                                                                                                                                                                                                                                                                                                                                                                                                                                                                                                                                                                                                                                                                                                                                                                                                                                                                                                                                                                                                                                                                                                                                                                                                                                                                                                                                                                                                                                                                                                                                                                                                                                                                                                                                                                                                                                                                                                                                                  |                       |            |      |   |                     |  |   |                              |  |   |                |  |   |                   |  |    |                  |  |  |  |  |  |  |  |  |  |  |  |  |  |
| Medical abortion (e.g. Cytotec/misoprostol).....                                                                                                   | 5                                                                                                                                                                                                                                                                                                                                                                                                                                                                                                                                                                                                                                                                                                                                                                                                                                                                                                                                                                                                                                                                                                                                                                                                                                                                                                                                                                                                                                                                                                                                                                  |                                                                                                                                                                                                                                                                                                                                                                                                                                                                                                                                                                                                                                                                                                                                                                                                                                                                                                                                                                                                                                                                                                                                                                                                                                                                                               |                                      |               |                                     |   |                                     |   |                                       |        |                                                  |   |                       |                                                                                                                                                                                                                                                                                                                                                                                                                                                                                                                                                                                                                                                                                                                                                                                                                                                                                                                                                                                                                                                                                                                                                                                                                                                                                                                                                                                                                                                                                                                                                                                                                                                                                                                                                                                                                                                                                                                                                                                                                                                                                                                                                                                                                                                  |                       |            |      |   |                     |  |   |                              |  |   |                |  |   |                   |  |    |                  |  |  |  |  |  |  |  |  |  |  |  |  |  |
| Other (specify) _____                                                                                                                              | 96                                                                                                                                                                                                                                                                                                                                                                                                                                                                                                                                                                                                                                                                                                                                                                                                                                                                                                                                                                                                                                                                                                                                                                                                                                                                                                                                                                                                                                                                                                                                                                 |                                                                                                                                                                                                                                                                                                                                                                                                                                                                                                                                                                                                                                                                                                                                                                                                                                                                                                                                                                                                                                                                                                                                                                                                                                                                                               |                                      |               |                                     |   |                                     |   |                                       |        |                                                  |   |                       |                                                                                                                                                                                                                                                                                                                                                                                                                                                                                                                                                                                                                                                                                                                                                                                                                                                                                                                                                                                                                                                                                                                                                                                                                                                                                                                                                                                                                                                                                                                                                                                                                                                                                                                                                                                                                                                                                                                                                                                                                                                                                                                                                                                                                                                  |                       |            |      |   |                     |  |   |                              |  |   |                |  |   |                   |  |    |                  |  |  |  |  |  |  |  |  |  |  |  |  |  |
| Not applicable.....                                                                                                                                | 99                                                                                                                                                                                                                                                                                                                                                                                                                                                                                                                                                                                                                                                                                                                                                                                                                                                                                                                                                                                                                                                                                                                                                                                                                                                                                                                                                                                                                                                                                                                                                                 |                                                                                                                                                                                                                                                                                                                                                                                                                                                                                                                                                                                                                                                                                                                                                                                                                                                                                                                                                                                                                                                                                                                                                                                                                                                                                               |                                      |               |                                     |   |                                     |   |                                       |        |                                                  |   |                       |                                                                                                                                                                                                                                                                                                                                                                                                                                                                                                                                                                                                                                                                                                                                                                                                                                                                                                                                                                                                                                                                                                                                                                                                                                                                                                                                                                                                                                                                                                                                                                                                                                                                                                                                                                                                                                                                                                                                                                                                                                                                                                                                                                                                                                                  |                       |            |      |   |                     |  |   |                              |  |   |                |  |   |                   |  |    |                  |  |  |  |  |  |  |  |  |  |  |  |  |  |
| 216                                                                                                                                                | <p>In a typical month or year, what percentage of the post-abortion patients at this facility you think had these complications?</p> <p><b>[Interviewer: The percentages must add up to at least 100%. They may add up to more than 100% since a patient may suffer from more than one complication.]</b></p>                                                                                                                                                                                                                                                                                                                                                                                                                                                                                                                                                                                                                                                                                                                                                                                                                                                                                                                                                                                                                                                                                                                                                                                                                                                      | <table style="width: 100%; border-collapse: collapse;"> <thead> <tr> <th style="width: 5%;"></th> <th style="width: 75%;"></th> <th style="width: 20%; text-align: center;">%</th> </tr> </thead> <tbody> <tr><td style="text-align: center;">1</td><td>Shock</td><td style="border: 1px solid black;"></td></tr> <tr><td style="text-align: center;">2</td><td>Sepsis</td><td style="border: 1px solid black;"></td></tr> <tr><td style="text-align: center;">3</td><td>Uterine perforation</td><td style="border: 1px solid black;"></td></tr> <tr><td style="text-align: center;">4</td><td>Hemorrhage</td><td style="border: 1px solid black;"></td></tr> <tr><td style="text-align: center;">5</td><td>Incomplete abortion</td><td style="border: 1px solid black;"></td></tr> <tr><td style="text-align: center;">6</td><td>Cervical/vaginal lacerations</td><td style="border: 1px solid black;"></td></tr> <tr><td style="text-align: center;">7</td><td>Bladder injury</td><td style="border: 1px solid black;"></td></tr> <tr><td style="text-align: center;">8</td><td>Intestinal injury</td><td style="border: 1px solid black;"></td></tr> <tr><td style="text-align: center;">96</td><td>Other (specify):</td><td style="border: 1px solid black;"></td></tr> </tbody> </table> |                                      |               | %                                   | 1 | Shock                               |   | 2                                     | Sepsis |                                                  | 3 | Uterine perforation   |                                                                                                                                                                                                                                                                                                                                                                                                                                                                                                                                                                                                                                                                                                                                                                                                                                                                                                                                                                                                                                                                                                                                                                                                                                                                                                                                                                                                                                                                                                                                                                                                                                                                                                                                                                                                                                                                                                                                                                                                                                                                                                                                                                                                                                                  | 4                     | Hemorrhage |      | 5 | Incomplete abortion |  | 6 | Cervical/vaginal lacerations |  | 7 | Bladder injury |  | 8 | Intestinal injury |  | 96 | Other (specify): |  |  |  |  |  |  |  |  |  |  |  |  |  |
|                                                                                                                                                    |                                                                                                                                                                                                                                                                                                                                                                                                                                                                                                                                                                                                                                                                                                                                                                                                                                                                                                                                                                                                                                                                                                                                                                                                                                                                                                                                                                                                                                                                                                                                                                    | %                                                                                                                                                                                                                                                                                                                                                                                                                                                                                                                                                                                                                                                                                                                                                                                                                                                                                                                                                                                                                                                                                                                                                                                                                                                                                             |                                      |               |                                     |   |                                     |   |                                       |        |                                                  |   |                       |                                                                                                                                                                                                                                                                                                                                                                                                                                                                                                                                                                                                                                                                                                                                                                                                                                                                                                                                                                                                                                                                                                                                                                                                                                                                                                                                                                                                                                                                                                                                                                                                                                                                                                                                                                                                                                                                                                                                                                                                                                                                                                                                                                                                                                                  |                       |            |      |   |                     |  |   |                              |  |   |                |  |   |                   |  |    |                  |  |  |  |  |  |  |  |  |  |  |  |  |  |
| 1                                                                                                                                                  | Shock                                                                                                                                                                                                                                                                                                                                                                                                                                                                                                                                                                                                                                                                                                                                                                                                                                                                                                                                                                                                                                                                                                                                                                                                                                                                                                                                                                                                                                                                                                                                                              |                                                                                                                                                                                                                                                                                                                                                                                                                                                                                                                                                                                                                                                                                                                                                                                                                                                                                                                                                                                                                                                                                                                                                                                                                                                                                               |                                      |               |                                     |   |                                     |   |                                       |        |                                                  |   |                       |                                                                                                                                                                                                                                                                                                                                                                                                                                                                                                                                                                                                                                                                                                                                                                                                                                                                                                                                                                                                                                                                                                                                                                                                                                                                                                                                                                                                                                                                                                                                                                                                                                                                                                                                                                                                                                                                                                                                                                                                                                                                                                                                                                                                                                                  |                       |            |      |   |                     |  |   |                              |  |   |                |  |   |                   |  |    |                  |  |  |  |  |  |  |  |  |  |  |  |  |  |
| 2                                                                                                                                                  | Sepsis                                                                                                                                                                                                                                                                                                                                                                                                                                                                                                                                                                                                                                                                                                                                                                                                                                                                                                                                                                                                                                                                                                                                                                                                                                                                                                                                                                                                                                                                                                                                                             |                                                                                                                                                                                                                                                                                                                                                                                                                                                                                                                                                                                                                                                                                                                                                                                                                                                                                                                                                                                                                                                                                                                                                                                                                                                                                               |                                      |               |                                     |   |                                     |   |                                       |        |                                                  |   |                       |                                                                                                                                                                                                                                                                                                                                                                                                                                                                                                                                                                                                                                                                                                                                                                                                                                                                                                                                                                                                                                                                                                                                                                                                                                                                                                                                                                                                                                                                                                                                                                                                                                                                                                                                                                                                                                                                                                                                                                                                                                                                                                                                                                                                                                                  |                       |            |      |   |                     |  |   |                              |  |   |                |  |   |                   |  |    |                  |  |  |  |  |  |  |  |  |  |  |  |  |  |
| 3                                                                                                                                                  | Uterine perforation                                                                                                                                                                                                                                                                                                                                                                                                                                                                                                                                                                                                                                                                                                                                                                                                                                                                                                                                                                                                                                                                                                                                                                                                                                                                                                                                                                                                                                                                                                                                                |                                                                                                                                                                                                                                                                                                                                                                                                                                                                                                                                                                                                                                                                                                                                                                                                                                                                                                                                                                                                                                                                                                                                                                                                                                                                                               |                                      |               |                                     |   |                                     |   |                                       |        |                                                  |   |                       |                                                                                                                                                                                                                                                                                                                                                                                                                                                                                                                                                                                                                                                                                                                                                                                                                                                                                                                                                                                                                                                                                                                                                                                                                                                                                                                                                                                                                                                                                                                                                                                                                                                                                                                                                                                                                                                                                                                                                                                                                                                                                                                                                                                                                                                  |                       |            |      |   |                     |  |   |                              |  |   |                |  |   |                   |  |    |                  |  |  |  |  |  |  |  |  |  |  |  |  |  |
| 4                                                                                                                                                  | Hemorrhage                                                                                                                                                                                                                                                                                                                                                                                                                                                                                                                                                                                                                                                                                                                                                                                                                                                                                                                                                                                                                                                                                                                                                                                                                                                                                                                                                                                                                                                                                                                                                         |                                                                                                                                                                                                                                                                                                                                                                                                                                                                                                                                                                                                                                                                                                                                                                                                                                                                                                                                                                                                                                                                                                                                                                                                                                                                                               |                                      |               |                                     |   |                                     |   |                                       |        |                                                  |   |                       |                                                                                                                                                                                                                                                                                                                                                                                                                                                                                                                                                                                                                                                                                                                                                                                                                                                                                                                                                                                                                                                                                                                                                                                                                                                                                                                                                                                                                                                                                                                                                                                                                                                                                                                                                                                                                                                                                                                                                                                                                                                                                                                                                                                                                                                  |                       |            |      |   |                     |  |   |                              |  |   |                |  |   |                   |  |    |                  |  |  |  |  |  |  |  |  |  |  |  |  |  |
| 5                                                                                                                                                  | Incomplete abortion                                                                                                                                                                                                                                                                                                                                                                                                                                                                                                                                                                                                                                                                                                                                                                                                                                                                                                                                                                                                                                                                                                                                                                                                                                                                                                                                                                                                                                                                                                                                                |                                                                                                                                                                                                                                                                                                                                                                                                                                                                                                                                                                                                                                                                                                                                                                                                                                                                                                                                                                                                                                                                                                                                                                                                                                                                                               |                                      |               |                                     |   |                                     |   |                                       |        |                                                  |   |                       |                                                                                                                                                                                                                                                                                                                                                                                                                                                                                                                                                                                                                                                                                                                                                                                                                                                                                                                                                                                                                                                                                                                                                                                                                                                                                                                                                                                                                                                                                                                                                                                                                                                                                                                                                                                                                                                                                                                                                                                                                                                                                                                                                                                                                                                  |                       |            |      |   |                     |  |   |                              |  |   |                |  |   |                   |  |    |                  |  |  |  |  |  |  |  |  |  |  |  |  |  |
| 6                                                                                                                                                  | Cervical/vaginal lacerations                                                                                                                                                                                                                                                                                                                                                                                                                                                                                                                                                                                                                                                                                                                                                                                                                                                                                                                                                                                                                                                                                                                                                                                                                                                                                                                                                                                                                                                                                                                                       |                                                                                                                                                                                                                                                                                                                                                                                                                                                                                                                                                                                                                                                                                                                                                                                                                                                                                                                                                                                                                                                                                                                                                                                                                                                                                               |                                      |               |                                     |   |                                     |   |                                       |        |                                                  |   |                       |                                                                                                                                                                                                                                                                                                                                                                                                                                                                                                                                                                                                                                                                                                                                                                                                                                                                                                                                                                                                                                                                                                                                                                                                                                                                                                                                                                                                                                                                                                                                                                                                                                                                                                                                                                                                                                                                                                                                                                                                                                                                                                                                                                                                                                                  |                       |            |      |   |                     |  |   |                              |  |   |                |  |   |                   |  |    |                  |  |  |  |  |  |  |  |  |  |  |  |  |  |
| 7                                                                                                                                                  | Bladder injury                                                                                                                                                                                                                                                                                                                                                                                                                                                                                                                                                                                                                                                                                                                                                                                                                                                                                                                                                                                                                                                                                                                                                                                                                                                                                                                                                                                                                                                                                                                                                     |                                                                                                                                                                                                                                                                                                                                                                                                                                                                                                                                                                                                                                                                                                                                                                                                                                                                                                                                                                                                                                                                                                                                                                                                                                                                                               |                                      |               |                                     |   |                                     |   |                                       |        |                                                  |   |                       |                                                                                                                                                                                                                                                                                                                                                                                                                                                                                                                                                                                                                                                                                                                                                                                                                                                                                                                                                                                                                                                                                                                                                                                                                                                                                                                                                                                                                                                                                                                                                                                                                                                                                                                                                                                                                                                                                                                                                                                                                                                                                                                                                                                                                                                  |                       |            |      |   |                     |  |   |                              |  |   |                |  |   |                   |  |    |                  |  |  |  |  |  |  |  |  |  |  |  |  |  |
| 8                                                                                                                                                  | Intestinal injury                                                                                                                                                                                                                                                                                                                                                                                                                                                                                                                                                                                                                                                                                                                                                                                                                                                                                                                                                                                                                                                                                                                                                                                                                                                                                                                                                                                                                                                                                                                                                  |                                                                                                                                                                                                                                                                                                                                                                                                                                                                                                                                                                                                                                                                                                                                                                                                                                                                                                                                                                                                                                                                                                                                                                                                                                                                                               |                                      |               |                                     |   |                                     |   |                                       |        |                                                  |   |                       |                                                                                                                                                                                                                                                                                                                                                                                                                                                                                                                                                                                                                                                                                                                                                                                                                                                                                                                                                                                                                                                                                                                                                                                                                                                                                                                                                                                                                                                                                                                                                                                                                                                                                                                                                                                                                                                                                                                                                                                                                                                                                                                                                                                                                                                  |                       |            |      |   |                     |  |   |                              |  |   |                |  |   |                   |  |    |                  |  |  |  |  |  |  |  |  |  |  |  |  |  |
| 96                                                                                                                                                 | Other (specify):                                                                                                                                                                                                                                                                                                                                                                                                                                                                                                                                                                                                                                                                                                                                                                                                                                                                                                                                                                                                                                                                                                                                                                                                                                                                                                                                                                                                                                                                                                                                                   |                                                                                                                                                                                                                                                                                                                                                                                                                                                                                                                                                                                                                                                                                                                                                                                                                                                                                                                                                                                                                                                                                                                                                                                                                                                                                               |                                      |               |                                     |   |                                     |   |                                       |        |                                                  |   |                       |                                                                                                                                                                                                                                                                                                                                                                                                                                                                                                                                                                                                                                                                                                                                                                                                                                                                                                                                                                                                                                                                                                                                                                                                                                                                                                                                                                                                                                                                                                                                                                                                                                                                                                                                                                                                                                                                                                                                                                                                                                                                                                                                                                                                                                                  |                       |            |      |   |                     |  |   |                              |  |   |                |  |   |                   |  |    |                  |  |  |  |  |  |  |  |  |  |  |  |  |  |
| <p>Now I would like to ask you about the <b>major</b> characteristics of women seeking treatment for abortion complications, at this facility.</p> |                                                                                                                                                                                                                                                                                                                                                                                                                                                                                                                                                                                                                                                                                                                                                                                                                                                                                                                                                                                                                                                                                                                                                                                                                                                                                                                                                                                                                                                                                                                                                                    |                                                                                                                                                                                                                                                                                                                                                                                                                                                                                                                                                                                                                                                                                                                                                                                                                                                                                                                                                                                                                                                                                                                                                                                                                                                                                               |                                      |               |                                     |   |                                     |   |                                       |        |                                                  |   |                       |                                                                                                                                                                                                                                                                                                                                                                                                                                                                                                                                                                                                                                                                                                                                                                                                                                                                                                                                                                                                                                                                                                                                                                                                                                                                                                                                                                                                                                                                                                                                                                                                                                                                                                                                                                                                                                                                                                                                                                                                                                                                                                                                                                                                                                                  |                       |            |      |   |                     |  |   |                              |  |   |                |  |   |                   |  |    |                  |  |  |  |  |  |  |  |  |  |  |  |  |  |
| 217                                                                                                                                                | <p>For every 100 women who are seen here for an abortion complication, about how many belong to each of the following age groups?<br/> <b>[Interviewer: Read out the age groups. Make sure the total adds up to 100%.]</b></p>                                                                                                                                                                                                                                                                                                                                                                                                                                                                                                                                                                                                                                                                                                                                                                                                                                                                                                                                                                                                                                                                                                                                                                                                                                                                                                                                     | <table border="1" style="width: 100%; border-collapse: collapse;"> <thead> <tr> <th style="width: 70%;"></th> <th style="width: 30%; text-align: center;">All Abortions</th> </tr> </thead> <tbody> <tr><td>14 years or younger</td><td style="border: 1px solid black;"></td></tr> <tr><td>15-19 years</td><td style="border: 1px solid black;"></td></tr> <tr><td>20-29 years</td><td style="border: 1px solid black;"></td></tr> <tr><td>30-39 years</td><td style="border: 1px solid black;"></td></tr> <tr><td>40+ years</td><td style="border: 1px solid black;"></td></tr> <tr><td>Don't Know</td><td style="border: 1px solid black;"></td></tr> <tr><td colspan="2" style="text-align: center; border: 1px solid black;">100%</td></tr> </tbody> </table>                                                                                                                                                                                                                                                                                                                                                                                                                                                                                                                            |                                      | All Abortions | 14 years or younger                 |   | 15-19 years                         |   | 20-29 years                           |        | 30-39 years                                      |   | 40+ years             |                                                                                                                                                                                                                                                                                                                                                                                                                                                                                                                                                                                                                                                                                                                                                                                                                                                                                                                                                                                                                                                                                                                                                                                                                                                                                                                                                                                                                                                                                                                                                                                                                                                                                                                                                                                                                                                                                                                                                                                                                                                                                                                                                                                                                                                  | Don't Know            |            | 100% |   |                     |  |   |                              |  |   |                |  |   |                   |  |    |                  |  |  |  |  |  |  |  |  |  |  |  |  |  |
|                                                                                                                                                    | All Abortions                                                                                                                                                                                                                                                                                                                                                                                                                                                                                                                                                                                                                                                                                                                                                                                                                                                                                                                                                                                                                                                                                                                                                                                                                                                                                                                                                                                                                                                                                                                                                      |                                                                                                                                                                                                                                                                                                                                                                                                                                                                                                                                                                                                                                                                                                                                                                                                                                                                                                                                                                                                                                                                                                                                                                                                                                                                                               |                                      |               |                                     |   |                                     |   |                                       |        |                                                  |   |                       |                                                                                                                                                                                                                                                                                                                                                                                                                                                                                                                                                                                                                                                                                                                                                                                                                                                                                                                                                                                                                                                                                                                                                                                                                                                                                                                                                                                                                                                                                                                                                                                                                                                                                                                                                                                                                                                                                                                                                                                                                                                                                                                                                                                                                                                  |                       |            |      |   |                     |  |   |                              |  |   |                |  |   |                   |  |    |                  |  |  |  |  |  |  |  |  |  |  |  |  |  |
| 14 years or younger                                                                                                                                |                                                                                                                                                                                                                                                                                                                                                                                                                                                                                                                                                                                                                                                                                                                                                                                                                                                                                                                                                                                                                                                                                                                                                                                                                                                                                                                                                                                                                                                                                                                                                                    |                                                                                                                                                                                                                                                                                                                                                                                                                                                                                                                                                                                                                                                                                                                                                                                                                                                                                                                                                                                                                                                                                                                                                                                                                                                                                               |                                      |               |                                     |   |                                     |   |                                       |        |                                                  |   |                       |                                                                                                                                                                                                                                                                                                                                                                                                                                                                                                                                                                                                                                                                                                                                                                                                                                                                                                                                                                                                                                                                                                                                                                                                                                                                                                                                                                                                                                                                                                                                                                                                                                                                                                                                                                                                                                                                                                                                                                                                                                                                                                                                                                                                                                                  |                       |            |      |   |                     |  |   |                              |  |   |                |  |   |                   |  |    |                  |  |  |  |  |  |  |  |  |  |  |  |  |  |
| 15-19 years                                                                                                                                        |                                                                                                                                                                                                                                                                                                                                                                                                                                                                                                                                                                                                                                                                                                                                                                                                                                                                                                                                                                                                                                                                                                                                                                                                                                                                                                                                                                                                                                                                                                                                                                    |                                                                                                                                                                                                                                                                                                                                                                                                                                                                                                                                                                                                                                                                                                                                                                                                                                                                                                                                                                                                                                                                                                                                                                                                                                                                                               |                                      |               |                                     |   |                                     |   |                                       |        |                                                  |   |                       |                                                                                                                                                                                                                                                                                                                                                                                                                                                                                                                                                                                                                                                                                                                                                                                                                                                                                                                                                                                                                                                                                                                                                                                                                                                                                                                                                                                                                                                                                                                                                                                                                                                                                                                                                                                                                                                                                                                                                                                                                                                                                                                                                                                                                                                  |                       |            |      |   |                     |  |   |                              |  |   |                |  |   |                   |  |    |                  |  |  |  |  |  |  |  |  |  |  |  |  |  |
| 20-29 years                                                                                                                                        |                                                                                                                                                                                                                                                                                                                                                                                                                                                                                                                                                                                                                                                                                                                                                                                                                                                                                                                                                                                                                                                                                                                                                                                                                                                                                                                                                                                                                                                                                                                                                                    |                                                                                                                                                                                                                                                                                                                                                                                                                                                                                                                                                                                                                                                                                                                                                                                                                                                                                                                                                                                                                                                                                                                                                                                                                                                                                               |                                      |               |                                     |   |                                     |   |                                       |        |                                                  |   |                       |                                                                                                                                                                                                                                                                                                                                                                                                                                                                                                                                                                                                                                                                                                                                                                                                                                                                                                                                                                                                                                                                                                                                                                                                                                                                                                                                                                                                                                                                                                                                                                                                                                                                                                                                                                                                                                                                                                                                                                                                                                                                                                                                                                                                                                                  |                       |            |      |   |                     |  |   |                              |  |   |                |  |   |                   |  |    |                  |  |  |  |  |  |  |  |  |  |  |  |  |  |
| 30-39 years                                                                                                                                        |                                                                                                                                                                                                                                                                                                                                                                                                                                                                                                                                                                                                                                                                                                                                                                                                                                                                                                                                                                                                                                                                                                                                                                                                                                                                                                                                                                                                                                                                                                                                                                    |                                                                                                                                                                                                                                                                                                                                                                                                                                                                                                                                                                                                                                                                                                                                                                                                                                                                                                                                                                                                                                                                                                                                                                                                                                                                                               |                                      |               |                                     |   |                                     |   |                                       |        |                                                  |   |                       |                                                                                                                                                                                                                                                                                                                                                                                                                                                                                                                                                                                                                                                                                                                                                                                                                                                                                                                                                                                                                                                                                                                                                                                                                                                                                                                                                                                                                                                                                                                                                                                                                                                                                                                                                                                                                                                                                                                                                                                                                                                                                                                                                                                                                                                  |                       |            |      |   |                     |  |   |                              |  |   |                |  |   |                   |  |    |                  |  |  |  |  |  |  |  |  |  |  |  |  |  |
| 40+ years                                                                                                                                          |                                                                                                                                                                                                                                                                                                                                                                                                                                                                                                                                                                                                                                                                                                                                                                                                                                                                                                                                                                                                                                                                                                                                                                                                                                                                                                                                                                                                                                                                                                                                                                    |                                                                                                                                                                                                                                                                                                                                                                                                                                                                                                                                                                                                                                                                                                                                                                                                                                                                                                                                                                                                                                                                                                                                                                                                                                                                                               |                                      |               |                                     |   |                                     |   |                                       |        |                                                  |   |                       |                                                                                                                                                                                                                                                                                                                                                                                                                                                                                                                                                                                                                                                                                                                                                                                                                                                                                                                                                                                                                                                                                                                                                                                                                                                                                                                                                                                                                                                                                                                                                                                                                                                                                                                                                                                                                                                                                                                                                                                                                                                                                                                                                                                                                                                  |                       |            |      |   |                     |  |   |                              |  |   |                |  |   |                   |  |    |                  |  |  |  |  |  |  |  |  |  |  |  |  |  |
| Don't Know                                                                                                                                         |                                                                                                                                                                                                                                                                                                                                                                                                                                                                                                                                                                                                                                                                                                                                                                                                                                                                                                                                                                                                                                                                                                                                                                                                                                                                                                                                                                                                                                                                                                                                                                    |                                                                                                                                                                                                                                                                                                                                                                                                                                                                                                                                                                                                                                                                                                                                                                                                                                                                                                                                                                                                                                                                                                                                                                                                                                                                                               |                                      |               |                                     |   |                                     |   |                                       |        |                                                  |   |                       |                                                                                                                                                                                                                                                                                                                                                                                                                                                                                                                                                                                                                                                                                                                                                                                                                                                                                                                                                                                                                                                                                                                                                                                                                                                                                                                                                                                                                                                                                                                                                                                                                                                                                                                                                                                                                                                                                                                                                                                                                                                                                                                                                                                                                                                  |                       |            |      |   |                     |  |   |                              |  |   |                |  |   |                   |  |    |                  |  |  |  |  |  |  |  |  |  |  |  |  |  |
| 100%                                                                                                                                               |                                                                                                                                                                                                                                                                                                                                                                                                                                                                                                                                                                                                                                                                                                                                                                                                                                                                                                                                                                                                                                                                                                                                                                                                                                                                                                                                                                                                                                                                                                                                                                    |                                                                                                                                                                                                                                                                                                                                                                                                                                                                                                                                                                                                                                                                                                                                                                                                                                                                                                                                                                                                                                                                                                                                                                                                                                                                                               |                                      |               |                                     |   |                                     |   |                                       |        |                                                  |   |                       |                                                                                                                                                                                                                                                                                                                                                                                                                                                                                                                                                                                                                                                                                                                                                                                                                                                                                                                                                                                                                                                                                                                                                                                                                                                                                                                                                                                                                                                                                                                                                                                                                                                                                                                                                                                                                                                                                                                                                                                                                                                                                                                                                                                                                                                  |                       |            |      |   |                     |  |   |                              |  |   |                |  |   |                   |  |    |                  |  |  |  |  |  |  |  |  |  |  |  |  |  |



|     |                                                                                                                                                  |                                                                                |                                                                                                                                     |   |   |  |
|-----|--------------------------------------------------------------------------------------------------------------------------------------------------|--------------------------------------------------------------------------------|-------------------------------------------------------------------------------------------------------------------------------------|---|---|--|
| 218 | What marital status, you think is <b>most commonly</b> encountered?<br><br><i>[Interviewer: Prompt if necessary]</i>                             | Married<br>Cohabiting<br>Single<br>Divorced/separated<br>Widowed<br>Don't Know | All Abortions<br>1<br>2<br>3<br>4<br>5<br>98                                                                                        |   |   |  |
| 219 | What level of education, you think is <b>most commonly</b> encountered?<br><br><i>[Interviewer: Prompt if necessary.]</i>                        | No education<br>Primary<br>Secondary<br>Post-secondary<br>Don't Know           | All Abortions<br>1<br>2<br>3<br>4<br>98                                                                                             |   |   |  |
| 220 | How many children do you think these women <b>most commonly</b> already have?<br><br><i>[Interviewer: Prompt if necessary. Circle only one.]</i> | Nulliparous<br>1-2<br>3-4<br>5 or more<br>Don't Know                           | All Abortions<br>1<br>2<br>3<br>4<br>98                                                                                             |   |   |  |
| 221 | Would you say that these women <b>more commonly</b> live in urban or rural areas?<br><br><i>[Interviewer: Circle only one.]</i>                  | Urban<br>Rural<br>Don't Know                                                   | All Abortions<br>1<br>2<br>98                                                                                                       |   |   |  |
| 222 | In this health facility, do you maintain information on the type of abortion complications treated?                                              | Yes.....<br>No.....                                                            | <table border="1"> <tr> <td data-bbox="1040 737 1133 768">1</td> </tr> <tr> <td data-bbox="1040 768 1133 800">2</td> </tr> </table> | 1 | 2 |  |
| 1   |                                                                                                                                                  |                                                                                |                                                                                                                                     |   |   |  |
| 2   |                                                                                                                                                  |                                                                                |                                                                                                                                     |   |   |  |

### Module III: Postabortion Counseling

|     |                                                                                                                                                                                       |                                                                                                                                                                                                                                                                                                                                                                                                                                                                                                                                                                                                                                                                                                                                                                                                                                                                                                                                                                                                                                                                                                                              |
|-----|---------------------------------------------------------------------------------------------------------------------------------------------------------------------------------------|------------------------------------------------------------------------------------------------------------------------------------------------------------------------------------------------------------------------------------------------------------------------------------------------------------------------------------------------------------------------------------------------------------------------------------------------------------------------------------------------------------------------------------------------------------------------------------------------------------------------------------------------------------------------------------------------------------------------------------------------------------------------------------------------------------------------------------------------------------------------------------------------------------------------------------------------------------------------------------------------------------------------------------------------------------------------------------------------------------------------------|
| 301 | Does this facility offer postabortion contraceptive counseling to all, some or none of PAC patients?<br><i>[Interviewer: Read out the alternatives]</i>                               | To all PAC patients..... <input style="width: 20px; text-align: center;" type="text" value="1"/> → <b>[Skip to 303]</b><br>To some of PAC patients..... <input style="width: 20px; text-align: center;" type="text" value="2"/><br>None..... <input style="width: 20px; text-align: center;" type="text" value="3"/>                                                                                                                                                                                                                                                                                                                                                                                                                                                                                                                                                                                                                                                                                                                                                                                                         |
| 302 | For those patients to whom this facility doesn't offer post-abortion contraceptive counseling, what are the reasons?                                                                  | _____<br>_____<br>_____                                                                                                                                                                                                                                                                                                                                                                                                                                                                                                                                                                                                                                                                                                                                                                                                                                                                                                                                                                                                                                                                                                      |
| 303 | Do you think women treated for abortion complications <b><u>should be given contraceptive counseling while still in the health facility?</u></b>                                      | Yes..... <input style="width: 20px; text-align: center;" type="text" value="1"/> → <b>[Skip to 305]</b><br>No..... <input style="width: 20px; text-align: center;" type="text" value="2"/><br>Sometimes..... <input style="width: 20px; text-align: center;" type="text" value="3"/> → <b>[Skip to 305]</b><br>Don't know/No opinion <input style="width: 20px; text-align: center;" type="text" value="98"/> → <b>[Skip to 305]</b>                                                                                                                                                                                                                                                                                                                                                                                                                                                                                                                                                                                                                                                                                         |
| 304 | Why do you think women treated for abortion complications should NOT receive family planning/contraceptive counseling?                                                                | _____<br>_____<br>_____                                                                                                                                                                                                                                                                                                                                                                                                                                                                                                                                                                                                                                                                                                                                                                                                                                                                                                                                                                                                                                                                                                      |
| 305 | What topics <b><u>do you generally</u></b> cover in contraceptive counseling for post-abortion care patients?<br><br><i>[Interviewer: DO NOT PROMPT. Multiple responses allowed.]</i> | Instructions on correct use of all methods..... <input style="width: 20px; text-align: center;" type="text" value="1"/><br>Instructions on available methods..... <input style="width: 20px; text-align: center;" type="text" value="1"/><br>Instructions on traditional/natural methods only..... <input style="width: 20px; text-align: center;" type="text" value="1"/><br>Instructions on side effects..... <input style="width: 20px; text-align: center;" type="text" value="1"/><br>Advantages & disadvantages of each..... <input style="width: 20px; text-align: center;" type="text" value="1"/><br>What to do in cases of method failure or forgetting pills..... <input style="width: 20px; text-align: center;" type="text" value="1"/><br>Abstinence..... <input style="width: 20px; text-align: center;" type="text" value="1"/><br>Other information you think should be included..... <input style="width: 20px; text-align: center;" type="text" value="96"/><br>(specify) _____<br>Not applicable/No counseling provided ..... <input style="width: 20px; text-align: center;" type="text" value="99"/>   |
| 306 | What topics should be covered in the counseling on contraception for postabortion patients?<br><br><i>[Interviewer: DO NOT PROMPT. Multiple responses allowed.]</i>                   | Instructions on correct use of all methods..... <input style="width: 20px; text-align: center;" type="text" value="1"/><br>Instructions on available methods..... <input style="width: 20px; text-align: center;" type="text" value="1"/><br>Instructions on traditional/natural methods only..... <input style="width: 20px; text-align: center;" type="text" value="1"/><br>Instructions on side effects..... <input style="width: 20px; text-align: center;" type="text" value="1"/><br>Advantages & disadvantages of each..... <input style="width: 20px; text-align: center;" type="text" value="1"/><br>What to do in case of method failure or forgetting pills..... <input style="width: 20px; text-align: center;" type="text" value="1"/><br>Abstinence..... <input style="width: 20px; text-align: center;" type="text" value="1"/><br>Other information you think should be included..... <input style="width: 20px; text-align: center;" type="text" value="96"/><br>(specify) _____<br>No topics should be covered/No counseling ..... <input style="width: 20px; text-align: center;" type="text" value="1"/> |
| 307 | Do you involve men (OR PARTNERS?) in contraceptive selection                                                                                                                          | Yes..... <input style="width: 20px; text-align: center;" type="text" value="1"/><br>No..... <input style="width: 20px; text-align: center;" type="text" value="2"/>                                                                                                                                                                                                                                                                                                                                                                                                                                                                                                                                                                                                                                                                                                                                                                                                                                                                                                                                                          |
| 308 | IF YES, explain how you involve men , IF NO, explain why you do not involve them in contraceptive selection?                                                                          | _____<br>_____<br>_____<br>_____<br>_____                                                                                                                                                                                                                                                                                                                                                                                                                                                                                                                                                                                                                                                                                                                                                                                                                                                                                                                                                                                                                                                                                    |

|                                                                                                                                                                          |                                                                                                                                                                                                                                                                                                                                                                                                                                                                                                                                                                                                                                     |                                          |   |                                             |   |                                               |   |                                                            |   |                         |   |                                             |   |                        |   |                           |   |                              |    |                 |   |                      |    |       |  |       |  |
|--------------------------------------------------------------------------------------------------------------------------------------------------------------------------|-------------------------------------------------------------------------------------------------------------------------------------------------------------------------------------------------------------------------------------------------------------------------------------------------------------------------------------------------------------------------------------------------------------------------------------------------------------------------------------------------------------------------------------------------------------------------------------------------------------------------------------|------------------------------------------|---|---------------------------------------------|---|-----------------------------------------------|---|------------------------------------------------------------|---|-------------------------|---|---------------------------------------------|---|------------------------|---|---------------------------|---|------------------------------|----|-----------------|---|----------------------|----|-------|--|-------|--|
| <p>309 Do you offer contraceptive methods on the premises of this facility?</p>                                                                                          | <p>Yes..... <input type="checkbox"/> 1<br/>         No..... <input type="checkbox"/> 2 → [Skip to Module 4]</p>                                                                                                                                                                                                                                                                                                                                                                                                                                                                                                                     |                                          |   |                                             |   |                                               |   |                                                            |   |                         |   |                                             |   |                        |   |                           |   |                              |    |                 |   |                      |    |       |  |       |  |
| <p>310 Which methods does your facility <b>commonly</b> offer to postabortion care patients?</p> <p><i>[Interviewer: DO NOT PROMPT. Multiple responses allowed.]</i></p> | <table border="1"> <tr><td>Pills.....</td><td>1</td></tr> <tr><td>Injectables.....</td><td>1</td></tr> <tr><td>Implants.....</td><td>1</td></tr> <tr><td>Female sterilization.....</td><td>1</td></tr> <tr><td>IUD.....</td><td>1</td></tr> <tr><td>Rhythm method (e.g. Moon beads) .....</td><td>1</td></tr> <tr><td>Condoms.....</td><td>1</td></tr> <tr><td>Vasectomy.....</td><td>1</td></tr> <tr><td>Emergency contraception.....</td><td>1</td></tr> <tr><td>Withdrawal.....</td><td>1</td></tr> <tr><td>Other (specify).....</td><td>96</td></tr> <tr><td>_____</td><td></td></tr> <tr><td>_____</td><td></td></tr> </table> | Pills.....                               | 1 | Injectables.....                            | 1 | Implants.....                                 | 1 | Female sterilization.....                                  | 1 | IUD.....                | 1 | Rhythm method (e.g. Moon beads) .....       | 1 | Condoms.....           | 1 | Vasectomy.....            | 1 | Emergency contraception..... | 1  | Withdrawal..... | 1 | Other (specify)..... | 96 | _____ |  | _____ |  |
| Pills.....                                                                                                                                                               | 1                                                                                                                                                                                                                                                                                                                                                                                                                                                                                                                                                                                                                                   |                                          |   |                                             |   |                                               |   |                                                            |   |                         |   |                                             |   |                        |   |                           |   |                              |    |                 |   |                      |    |       |  |       |  |
| Injectables.....                                                                                                                                                         | 1                                                                                                                                                                                                                                                                                                                                                                                                                                                                                                                                                                                                                                   |                                          |   |                                             |   |                                               |   |                                                            |   |                         |   |                                             |   |                        |   |                           |   |                              |    |                 |   |                      |    |       |  |       |  |
| Implants.....                                                                                                                                                            | 1                                                                                                                                                                                                                                                                                                                                                                                                                                                                                                                                                                                                                                   |                                          |   |                                             |   |                                               |   |                                                            |   |                         |   |                                             |   |                        |   |                           |   |                              |    |                 |   |                      |    |       |  |       |  |
| Female sterilization.....                                                                                                                                                | 1                                                                                                                                                                                                                                                                                                                                                                                                                                                                                                                                                                                                                                   |                                          |   |                                             |   |                                               |   |                                                            |   |                         |   |                                             |   |                        |   |                           |   |                              |    |                 |   |                      |    |       |  |       |  |
| IUD.....                                                                                                                                                                 | 1                                                                                                                                                                                                                                                                                                                                                                                                                                                                                                                                                                                                                                   |                                          |   |                                             |   |                                               |   |                                                            |   |                         |   |                                             |   |                        |   |                           |   |                              |    |                 |   |                      |    |       |  |       |  |
| Rhythm method (e.g. Moon beads) .....                                                                                                                                    | 1                                                                                                                                                                                                                                                                                                                                                                                                                                                                                                                                                                                                                                   |                                          |   |                                             |   |                                               |   |                                                            |   |                         |   |                                             |   |                        |   |                           |   |                              |    |                 |   |                      |    |       |  |       |  |
| Condoms.....                                                                                                                                                             | 1                                                                                                                                                                                                                                                                                                                                                                                                                                                                                                                                                                                                                                   |                                          |   |                                             |   |                                               |   |                                                            |   |                         |   |                                             |   |                        |   |                           |   |                              |    |                 |   |                      |    |       |  |       |  |
| Vasectomy.....                                                                                                                                                           | 1                                                                                                                                                                                                                                                                                                                                                                                                                                                                                                                                                                                                                                   |                                          |   |                                             |   |                                               |   |                                                            |   |                         |   |                                             |   |                        |   |                           |   |                              |    |                 |   |                      |    |       |  |       |  |
| Emergency contraception.....                                                                                                                                             | 1                                                                                                                                                                                                                                                                                                                                                                                                                                                                                                                                                                                                                                   |                                          |   |                                             |   |                                               |   |                                                            |   |                         |   |                                             |   |                        |   |                           |   |                              |    |                 |   |                      |    |       |  |       |  |
| Withdrawal.....                                                                                                                                                          | 1                                                                                                                                                                                                                                                                                                                                                                                                                                                                                                                                                                                                                                   |                                          |   |                                             |   |                                               |   |                                                            |   |                         |   |                                             |   |                        |   |                           |   |                              |    |                 |   |                      |    |       |  |       |  |
| Other (specify).....                                                                                                                                                     | 96                                                                                                                                                                                                                                                                                                                                                                                                                                                                                                                                                                                                                                  |                                          |   |                                             |   |                                               |   |                                                            |   |                         |   |                                             |   |                        |   |                           |   |                              |    |                 |   |                      |    |       |  |       |  |
| _____                                                                                                                                                                    |                                                                                                                                                                                                                                                                                                                                                                                                                                                                                                                                                                                                                                     |                                          |   |                                             |   |                                               |   |                                                            |   |                         |   |                                             |   |                        |   |                           |   |                              |    |                 |   |                      |    |       |  |       |  |
| _____                                                                                                                                                                    |                                                                                                                                                                                                                                                                                                                                                                                                                                                                                                                                                                                                                                     |                                          |   |                                             |   |                                               |   |                                                            |   |                         |   |                                             |   |                        |   |                           |   |                              |    |                 |   |                      |    |       |  |       |  |
| <p><b>[If provider selected all contraceptive methods in Q. 310, SKIP TO MODULE 4]</b></p>                                                                               |                                                                                                                                                                                                                                                                                                                                                                                                                                                                                                                                                                                                                                     |                                          |   |                                             |   |                                               |   |                                                            |   |                         |   |                                             |   |                        |   |                           |   |                              |    |                 |   |                      |    |       |  |       |  |
| <p>311 Why do you offer these methods and not others?</p> <p><i>[Interviewer: DO NOT PROMPT. Multiple responses allowed.]</i></p>                                        | <table border="1"> <tr><td>Those are the ones we have in stock.....</td><td>1</td></tr> <tr><td>Provider preferences based on training.....</td><td>1</td></tr> <tr><td>Provider preferences based on experience.....</td><td>1</td></tr> <tr><td>Provider preferences based on woman's characteristics.....</td><td>1</td></tr> <tr><td>Client preferences.....</td><td>1</td></tr> <tr><td>Not familiar enough with other methods.....</td><td>1</td></tr> <tr><td>Religious reasons.....</td><td>1</td></tr> <tr><td>Funder's restriction.....</td><td>1</td></tr> <tr><td>Other (specify): _____</td><td>96</td></tr> </table>  | Those are the ones we have in stock..... | 1 | Provider preferences based on training..... | 1 | Provider preferences based on experience..... | 1 | Provider preferences based on woman's characteristics..... | 1 | Client preferences..... | 1 | Not familiar enough with other methods..... | 1 | Religious reasons..... | 1 | Funder's restriction..... | 1 | Other (specify): _____       | 96 |                 |   |                      |    |       |  |       |  |
| Those are the ones we have in stock.....                                                                                                                                 | 1                                                                                                                                                                                                                                                                                                                                                                                                                                                                                                                                                                                                                                   |                                          |   |                                             |   |                                               |   |                                                            |   |                         |   |                                             |   |                        |   |                           |   |                              |    |                 |   |                      |    |       |  |       |  |
| Provider preferences based on training.....                                                                                                                              | 1                                                                                                                                                                                                                                                                                                                                                                                                                                                                                                                                                                                                                                   |                                          |   |                                             |   |                                               |   |                                                            |   |                         |   |                                             |   |                        |   |                           |   |                              |    |                 |   |                      |    |       |  |       |  |
| Provider preferences based on experience.....                                                                                                                            | 1                                                                                                                                                                                                                                                                                                                                                                                                                                                                                                                                                                                                                                   |                                          |   |                                             |   |                                               |   |                                                            |   |                         |   |                                             |   |                        |   |                           |   |                              |    |                 |   |                      |    |       |  |       |  |
| Provider preferences based on woman's characteristics.....                                                                                                               | 1                                                                                                                                                                                                                                                                                                                                                                                                                                                                                                                                                                                                                                   |                                          |   |                                             |   |                                               |   |                                                            |   |                         |   |                                             |   |                        |   |                           |   |                              |    |                 |   |                      |    |       |  |       |  |
| Client preferences.....                                                                                                                                                  | 1                                                                                                                                                                                                                                                                                                                                                                                                                                                                                                                                                                                                                                   |                                          |   |                                             |   |                                               |   |                                                            |   |                         |   |                                             |   |                        |   |                           |   |                              |    |                 |   |                      |    |       |  |       |  |
| Not familiar enough with other methods.....                                                                                                                              | 1                                                                                                                                                                                                                                                                                                                                                                                                                                                                                                                                                                                                                                   |                                          |   |                                             |   |                                               |   |                                                            |   |                         |   |                                             |   |                        |   |                           |   |                              |    |                 |   |                      |    |       |  |       |  |
| Religious reasons.....                                                                                                                                                   | 1                                                                                                                                                                                                                                                                                                                                                                                                                                                                                                                                                                                                                                   |                                          |   |                                             |   |                                               |   |                                                            |   |                         |   |                                             |   |                        |   |                           |   |                              |    |                 |   |                      |    |       |  |       |  |
| Funder's restriction.....                                                                                                                                                | 1                                                                                                                                                                                                                                                                                                                                                                                                                                                                                                                                                                                                                                   |                                          |   |                                             |   |                                               |   |                                                            |   |                         |   |                                             |   |                        |   |                           |   |                              |    |                 |   |                      |    |       |  |       |  |
| Other (specify): _____                                                                                                                                                   | 96                                                                                                                                                                                                                                                                                                                                                                                                                                                                                                                                                                                                                                  |                                          |   |                                             |   |                                               |   |                                                            |   |                         |   |                                             |   |                        |   |                           |   |                              |    |                 |   |                      |    |       |  |       |  |

## Module IV: General

*Now we would like to ask you some general questions about your opinions about the Ugandan abortion law; the barriers on the provision of PAC, as well as how services can be improved.*

| 401                                                                                                    | <p>Compared to your other services, about how much of a burden are postabortion care services on the care that your facility provides?</p> <p><b>[Interviewer: READ THE LIST, check ONE response.]</b></p>      | <p>A big burden <span style="float: right; border: 1px solid black; padding: 2px 5px;">1</span></p> <p>A moderate burden <span style="float: right; border: 1px solid black; padding: 2px 5px;">2</span></p> <p>A small burden <span style="float: right; border: 1px solid black; padding: 2px 5px;">3</span></p> <p>Not a burden <span style="float: right; border: 1px solid black; padding: 2px 5px;">4</span> → <b>[Skip to Q403]</b></p> <p>Don't know/No opinion <span style="float: right; border: 1px solid black; padding: 2px 5px;">98</span> → <b>[Skip to Q403]</b></p>                                                                                                                                                                                                                                                                                                                                                                                                                                                                                                                                                                                                                                                                                                                                                                                                                                                                                  |    |  |     |    |                           |  |   |   |                                      |  |   |   |                                        |  |   |   |                              |  |   |   |                     |  |   |   |
|--------------------------------------------------------------------------------------------------------|-----------------------------------------------------------------------------------------------------------------------------------------------------------------------------------------------------------------|-----------------------------------------------------------------------------------------------------------------------------------------------------------------------------------------------------------------------------------------------------------------------------------------------------------------------------------------------------------------------------------------------------------------------------------------------------------------------------------------------------------------------------------------------------------------------------------------------------------------------------------------------------------------------------------------------------------------------------------------------------------------------------------------------------------------------------------------------------------------------------------------------------------------------------------------------------------------------------------------------------------------------------------------------------------------------------------------------------------------------------------------------------------------------------------------------------------------------------------------------------------------------------------------------------------------------------------------------------------------------------------------------------------------------------------------------------------------------|----|--|-----|----|---------------------------|--|---|---|--------------------------------------|--|---|---|----------------------------------------|--|---|---|------------------------------|--|---|---|---------------------|--|---|---|
| 402                                                                                                    | <p>Please tell me whether the following aspects of postabortion care are a burden to the service ...</p> <p><b>[Interviewer: READ THE LIST. Multiple responses allowed. Probe for any other responses.]</b></p> | <table border="1" style="width: 100%; border-collapse: collapse; text-align: center;"> <thead> <tr> <th style="width: 80%;"></th> <th style="width: 10%;"></th> <th style="width: 10%;">Yes</th> <th style="width: 10%;">No</th> </tr> </thead> <tbody> <tr> <td>a. The number of patients</td> <td></td> <td>1</td> <td>2</td> </tr> <tr> <td>b. The drain on equipment/ resources</td> <td></td> <td>1</td> <td>2</td> </tr> <tr> <td>c. Human resources/qualified personnel</td> <td></td> <td>1</td> <td>2</td> </tr> <tr> <td>d. Clients' inability to pay</td> <td></td> <td>1</td> <td>2</td> </tr> <tr> <td>e. Other (specify):</td> <td></td> <td>1</td> <td>2</td> </tr> </tbody> </table>                                                                                                                                                                                                                                                                                                                                                                                                                                                                                                                                                                                                                                                                                                                                                                  |    |  | Yes | No | a. The number of patients |  | 1 | 2 | b. The drain on equipment/ resources |  | 1 | 2 | c. Human resources/qualified personnel |  | 1 | 2 | d. Clients' inability to pay |  | 1 | 2 | e. Other (specify): |  | 1 | 2 |
|                                                                                                        |                                                                                                                                                                                                                 | Yes                                                                                                                                                                                                                                                                                                                                                                                                                                                                                                                                                                                                                                                                                                                                                                                                                                                                                                                                                                                                                                                                                                                                                                                                                                                                                                                                                                                                                                                                   | No |  |     |    |                           |  |   |   |                                      |  |   |   |                                        |  |   |   |                              |  |   |   |                     |  |   |   |
| a. The number of patients                                                                              |                                                                                                                                                                                                                 | 1                                                                                                                                                                                                                                                                                                                                                                                                                                                                                                                                                                                                                                                                                                                                                                                                                                                                                                                                                                                                                                                                                                                                                                                                                                                                                                                                                                                                                                                                     | 2  |  |     |    |                           |  |   |   |                                      |  |   |   |                                        |  |   |   |                              |  |   |   |                     |  |   |   |
| b. The drain on equipment/ resources                                                                   |                                                                                                                                                                                                                 | 1                                                                                                                                                                                                                                                                                                                                                                                                                                                                                                                                                                                                                                                                                                                                                                                                                                                                                                                                                                                                                                                                                                                                                                                                                                                                                                                                                                                                                                                                     | 2  |  |     |    |                           |  |   |   |                                      |  |   |   |                                        |  |   |   |                              |  |   |   |                     |  |   |   |
| c. Human resources/qualified personnel                                                                 |                                                                                                                                                                                                                 | 1                                                                                                                                                                                                                                                                                                                                                                                                                                                                                                                                                                                                                                                                                                                                                                                                                                                                                                                                                                                                                                                                                                                                                                                                                                                                                                                                                                                                                                                                     | 2  |  |     |    |                           |  |   |   |                                      |  |   |   |                                        |  |   |   |                              |  |   |   |                     |  |   |   |
| d. Clients' inability to pay                                                                           |                                                                                                                                                                                                                 | 1                                                                                                                                                                                                                                                                                                                                                                                                                                                                                                                                                                                                                                                                                                                                                                                                                                                                                                                                                                                                                                                                                                                                                                                                                                                                                                                                                                                                                                                                     | 2  |  |     |    |                           |  |   |   |                                      |  |   |   |                                        |  |   |   |                              |  |   |   |                     |  |   |   |
| e. Other (specify):                                                                                    |                                                                                                                                                                                                                 | 1                                                                                                                                                                                                                                                                                                                                                                                                                                                                                                                                                                                                                                                                                                                                                                                                                                                                                                                                                                                                                                                                                                                                                                                                                                                                                                                                                                                                                                                                     | 2  |  |     |    |                           |  |   |   |                                      |  |   |   |                                        |  |   |   |                              |  |   |   |                     |  |   |   |
| 403                                                                                                    | <p>In your opinion, how could treatment for abortion complications be improved at this facility?</p> <p><b>[Interviewer: Do not read the list. Multiple responses are allowed.]</b></p>                         | <p>a. Have a private room for postabortion care patients <span style="float: right; border: 1px solid black; padding: 2px 5px;">1</span></p> <p>b. Improve/expand infrastructure <span style="float: right; border: 1px solid black; padding: 2px 5px;">1</span></p> <p>c. Have more trained people available <span style="float: right; border: 1px solid black; padding: 2px 5px;">1</span></p> <p>d. Have available more commodities (MVA equipment, antibiotics, blood, pain medication) <span style="float: right; border: 1px solid black; padding: 2px 5px;">1</span></p> <p>e. Provide information on contraception and give methods <span style="float: right; border: 1px solid black; padding: 2px 5px;">1</span></p> <p>f. Provide protocols for caring for postabortion patients <span style="float: right; border: 1px solid black; padding: 2px 5px;">1</span></p> <p>g. Nothing is needed, current treatment is adequate <span style="float: right; border: 1px solid black; padding: 2px 5px;">1</span></p> <p>h. Other (specify): <span style="float: right; border: 1px solid black; padding: 2px 5px;">96</span></p>                                                                                                                                                                                                                                                                                                                              |    |  |     |    |                           |  |   |   |                                      |  |   |   |                                        |  |   |   |                              |  |   |   |                     |  |   |   |
| 404                                                                                                    | <p>Does the current Ugandan law permit abortion only to protect the life and health of the woman?</p>                                                                                                           | <p>Yes..... <span style="float: right; border: 1px solid black; padding: 2px 5px;">1</span></p> <p>No..... <span style="float: right; border: 1px solid black; padding: 2px 5px;">2</span> → <b>[Skip to Q406]</b></p> <p>Don't know /No opinion..... <span style="float: right; border: 1px solid black; padding: 2px 5px;">3</span> → <b>[Skip to Q407]</b></p>                                                                                                                                                                                                                                                                                                                                                                                                                                                                                                                                                                                                                                                                                                                                                                                                                                                                                                                                                                                                                                                                                                     |    |  |     |    |                           |  |   |   |                                      |  |   |   |                                        |  |   |   |                              |  |   |   |                     |  |   |   |
| 405                                                                                                    | <p>Do you think the abortion law in Uganda should be changed?</p>                                                                                                                                               | <p>Yes..... <span style="float: right; border: 1px solid black; padding: 2px 5px;">1</span></p> <p>No..... <span style="float: right; border: 1px solid black; padding: 2px 5px;">2</span> → <b>[Skip to Q407]</b></p> <p>Don't know /No opinion..... <span style="float: right; border: 1px solid black; padding: 2px 5px;">98</span> → <b>[Skip to Q407]</b></p>                                                                                                                                                                                                                                                                                                                                                                                                                                                                                                                                                                                                                                                                                                                                                                                                                                                                                                                                                                                                                                                                                                    |    |  |     |    |                           |  |   |   |                                      |  |   |   |                                        |  |   |   |                              |  |   |   |                     |  |   |   |
| 406                                                                                                    | <p>Under what circumstances should abortion be provided?</p> <p><b>[Interviewer: DO NOT READ the list and circle all that apply. Multiple responses are allowed.]</b></p>                                       | <p><b>Abortion should be provided:</b></p> <p>a. On demand (if the woman requests for it)..... <span style="float: right; border: 1px solid black; padding: 2px 5px;">1</span></p> <p>b. If the woman's health is at risk..... <span style="float: right; border: 1px solid black; padding: 2px 5px;">1</span></p> <p>c. If the girl is still in school..... <span style="float: right; border: 1px solid black; padding: 2px 5px;">1</span></p> <p>d. Unmarried girl/woman ..... <span style="float: right; border: 1px solid black; padding: 2px 5px;">1</span></p> <p>e. If the girl/woman cannot care for the child..... <span style="float: right; border: 1px solid black; padding: 2px 5px;">1</span></p> <p>f. If the mother is HIV+..... <span style="float: right; border: 1px solid black; padding: 2px 5px;">1</span></p> <p>g. Pregnancies after incest..... <span style="float: right; border: 1px solid black; padding: 2px 5px;">1</span></p> <p>h. Pregnancies after rape..... <span style="float: right; border: 1px solid black; padding: 2px 5px;">1</span></p> <p>i. Contraceptive failure..... <span style="float: right; border: 1px solid black; padding: 2px 5px;">1</span></p> <p>j. Abortion should not ever be provided..... <span style="float: right; border: 1px solid black; padding: 2px 5px;">1</span></p> <p>k. Others (Specify) <span style="float: right; border: 1px solid black; padding: 2px 5px;">96</span></p> <p>_____</p> |    |  |     |    |                           |  |   |   |                                      |  |   |   |                                        |  |   |   |                              |  |   |   |                     |  |   |   |
| <p><b>[Interviewer: See Q.222. If respondent answered "YES," ask Q.407. Otherwise, go to END.]</b></p> |                                                                                                                                                                                                                 |                                                                                                                                                                                                                                                                                                                                                                                                                                                                                                                                                                                                                                                                                                                                                                                                                                                                                                                                                                                                                                                                                                                                                                                                                                                                                                                                                                                                                                                                       |    |  |     |    |                           |  |   |   |                                      |  |   |   |                                        |  |   |   |                              |  |   |   |                     |  |   |   |

| 407                                               | <p>You mentioned this facility maintains information about the type of abortion complications treated in this facility. Would it be possible to have access to that information or data?</p>                                                                                                                                                                                                                    | <p>Yes <input type="checkbox"/> 1<br/>         No <input type="checkbox"/> 2 → [END]</p>                                                                                                                                                                                                                                                                                                                                                                                                                                                                                                                                                                                         |  |        |              |       |  |  |        |  |  |                     |  |  |            |  |  |                     |  |  |                              |  |  |                |  |  |                   |  |  |                  |  |  |                            |  |  |
|---------------------------------------------------|-----------------------------------------------------------------------------------------------------------------------------------------------------------------------------------------------------------------------------------------------------------------------------------------------------------------------------------------------------------------------------------------------------------------|----------------------------------------------------------------------------------------------------------------------------------------------------------------------------------------------------------------------------------------------------------------------------------------------------------------------------------------------------------------------------------------------------------------------------------------------------------------------------------------------------------------------------------------------------------------------------------------------------------------------------------------------------------------------------------|--|--------|--------------|-------|--|--|--------|--|--|---------------------|--|--|------------|--|--|---------------------|--|--|------------------------------|--|--|----------------|--|--|-------------------|--|--|------------------|--|--|----------------------------|--|--|
| 408                                               | <p><b><i>[Interviewer: Record the number of women treated in 2012 or last year available according to the following abortion complications.</i></b></p> <p><b><i>Obtain a photocopy or actual records, if available.</i></b></p> <p><b><i>If a breakdown of complications is not available, just take the total number of PAC cases treated and thank the respondent/health records administrator.]</i></b></p> | <table border="1"> <thead> <tr> <th></th> <th>Number</th> <th>Year of Data</th> </tr> </thead> <tbody> <tr><td>Shock</td><td></td><td></td></tr> <tr><td>Sepsis</td><td></td><td></td></tr> <tr><td>Uterine perforation</td><td></td><td></td></tr> <tr><td>Hemorrhage</td><td></td><td></td></tr> <tr><td>Incomplete abortion</td><td></td><td></td></tr> <tr><td>Cervical/vaginal lacerations</td><td></td><td></td></tr> <tr><td>Bladder injury</td><td></td><td></td></tr> <tr><td>Intestinal injury</td><td></td><td></td></tr> <tr><td>Other (specify):</td><td></td><td></td></tr> <tr> <td>Total number of PAC cases:</td> <td colspan="2"></td> </tr> </tbody> </table> |  | Number | Year of Data | Shock |  |  | Sepsis |  |  | Uterine perforation |  |  | Hemorrhage |  |  | Incomplete abortion |  |  | Cervical/vaginal lacerations |  |  | Bladder injury |  |  | Intestinal injury |  |  | Other (specify): |  |  | Total number of PAC cases: |  |  |
|                                                   | Number                                                                                                                                                                                                                                                                                                                                                                                                          | Year of Data                                                                                                                                                                                                                                                                                                                                                                                                                                                                                                                                                                                                                                                                     |  |        |              |       |  |  |        |  |  |                     |  |  |            |  |  |                     |  |  |                              |  |  |                |  |  |                   |  |  |                  |  |  |                            |  |  |
| Shock                                             |                                                                                                                                                                                                                                                                                                                                                                                                                 |                                                                                                                                                                                                                                                                                                                                                                                                                                                                                                                                                                                                                                                                                  |  |        |              |       |  |  |        |  |  |                     |  |  |            |  |  |                     |  |  |                              |  |  |                |  |  |                   |  |  |                  |  |  |                            |  |  |
| Sepsis                                            |                                                                                                                                                                                                                                                                                                                                                                                                                 |                                                                                                                                                                                                                                                                                                                                                                                                                                                                                                                                                                                                                                                                                  |  |        |              |       |  |  |        |  |  |                     |  |  |            |  |  |                     |  |  |                              |  |  |                |  |  |                   |  |  |                  |  |  |                            |  |  |
| Uterine perforation                               |                                                                                                                                                                                                                                                                                                                                                                                                                 |                                                                                                                                                                                                                                                                                                                                                                                                                                                                                                                                                                                                                                                                                  |  |        |              |       |  |  |        |  |  |                     |  |  |            |  |  |                     |  |  |                              |  |  |                |  |  |                   |  |  |                  |  |  |                            |  |  |
| Hemorrhage                                        |                                                                                                                                                                                                                                                                                                                                                                                                                 |                                                                                                                                                                                                                                                                                                                                                                                                                                                                                                                                                                                                                                                                                  |  |        |              |       |  |  |        |  |  |                     |  |  |            |  |  |                     |  |  |                              |  |  |                |  |  |                   |  |  |                  |  |  |                            |  |  |
| Incomplete abortion                               |                                                                                                                                                                                                                                                                                                                                                                                                                 |                                                                                                                                                                                                                                                                                                                                                                                                                                                                                                                                                                                                                                                                                  |  |        |              |       |  |  |        |  |  |                     |  |  |            |  |  |                     |  |  |                              |  |  |                |  |  |                   |  |  |                  |  |  |                            |  |  |
| Cervical/vaginal lacerations                      |                                                                                                                                                                                                                                                                                                                                                                                                                 |                                                                                                                                                                                                                                                                                                                                                                                                                                                                                                                                                                                                                                                                                  |  |        |              |       |  |  |        |  |  |                     |  |  |            |  |  |                     |  |  |                              |  |  |                |  |  |                   |  |  |                  |  |  |                            |  |  |
| Bladder injury                                    |                                                                                                                                                                                                                                                                                                                                                                                                                 |                                                                                                                                                                                                                                                                                                                                                                                                                                                                                                                                                                                                                                                                                  |  |        |              |       |  |  |        |  |  |                     |  |  |            |  |  |                     |  |  |                              |  |  |                |  |  |                   |  |  |                  |  |  |                            |  |  |
| Intestinal injury                                 |                                                                                                                                                                                                                                                                                                                                                                                                                 |                                                                                                                                                                                                                                                                                                                                                                                                                                                                                                                                                                                                                                                                                  |  |        |              |       |  |  |        |  |  |                     |  |  |            |  |  |                     |  |  |                              |  |  |                |  |  |                   |  |  |                  |  |  |                            |  |  |
| Other (specify):                                  |                                                                                                                                                                                                                                                                                                                                                                                                                 |                                                                                                                                                                                                                                                                                                                                                                                                                                                                                                                                                                                                                                                                                  |  |        |              |       |  |  |        |  |  |                     |  |  |            |  |  |                     |  |  |                              |  |  |                |  |  |                   |  |  |                  |  |  |                            |  |  |
| Total number of PAC cases:                        |                                                                                                                                                                                                                                                                                                                                                                                                                 |                                                                                                                                                                                                                                                                                                                                                                                                                                                                                                                                                                                                                                                                                  |  |        |              |       |  |  |        |  |  |                     |  |  |            |  |  |                     |  |  |                              |  |  |                |  |  |                   |  |  |                  |  |  |                            |  |  |
| <p><b>END: Thank you for your cooperation</b></p> |                                                                                                                                                                                                                                                                                                                                                                                                                 |                                                                                                                                                                                                                                                                                                                                                                                                                                                                                                                                                                                                                                                                                  |  |        |              |       |  |  |        |  |  |                     |  |  |            |  |  |                     |  |  |                              |  |  |                |  |  |                   |  |  |                  |  |  |                            |  |  |
