# Supplementary material for: Incidence of Induced Abortion in Uganda, 2013: New Estimates Since 2003
Source: PubMed Central journal article supplement (PMC5089684; doi:10.1371/journal.pone.0165812), 2016-11-01
Supplement: pone.0165812.s002.pdf [file pone.0165812.s002.pdf]

**Investigation on Abortion and Postabortion Care (PAC)**  
***Survey of Health Professionals in Uganda, 2013***

My name is ..... and I am working with Makerere University/School of Public Health. The School in conjunction with the Guttmacher Institute, a USA research organization, is conducting a research project designed to update the conditions and the health implications of induced abortion, and to know how these have changed since 2003 when the first study on the incidence of abortion was carried out in Uganda. We would like to obtain your professional assessment of certain aspects of this practice.

We would greatly appreciate if you base your answers on your experience and knowledge, or if you lack actual experience, on your perception of the situation. Questions are asked separately about abortion practices in urban and rural areas, and separately about poor women and women who are relatively well-off (non-poor). If your experience or perceptions are insufficient to enable you to answer questions on a sub-group of women, please feel free to point this out. We urge you, however, to answer as fully as possible because your perceptions and opinions are valuable information where factual data are lacking. This interview will take at least 1 hour of your time.

**Your responses to this questionnaire will be completely confidential and will be used for research purposes only. No personal reference will be made to your participation in this survey of health care professionals. We will combine your responses with those of other health professionals to describe the general picture of induced abortion practice and its health implications in Uganda. Participating in this survey poses little if any risk. Although we expect that the results of this study will help improve the nation's health care system, there will be no direct financial benefit from it to you personally.**

Do I have your permission to proceed with the interview?

AGREE.....

DO NOT AGREE.....

Thank you

## Study on Abortion and Postabortion Care (PAC)

### Survey of Health Professionals in Uganda, 2013

|                                           |                                            |                                                                                                                                                                                                                                                                                                                                                                                                                                                                                                                                                                                                                                                                                                                                                                                                                                                                                                                                             |                                           |                                           |                                           |                                           |                                           |                                           |     |       |      |  |  |  |
|-------------------------------------------|--------------------------------------------|---------------------------------------------------------------------------------------------------------------------------------------------------------------------------------------------------------------------------------------------------------------------------------------------------------------------------------------------------------------------------------------------------------------------------------------------------------------------------------------------------------------------------------------------------------------------------------------------------------------------------------------------------------------------------------------------------------------------------------------------------------------------------------------------------------------------------------------------------------------------------------------------------------------------------------------------|-------------------------------------------|-------------------------------------------|-------------------------------------------|-------------------------------------------|-------------------------------------------|-------------------------------------------|-----|-------|------|--|--|--|
| 001.                                      | <b>Respondent Identification Number:</b>   | <input style="width: 100%;" type="text"/>                                                                                                                                                                                                                                                                                                                                                                                                                                                                                                                                                                                                                                                                                                                                                                                                                                                                                                   |                                           |                                           |                                           |                                           |                                           |                                           |     |       |      |  |  |  |
| 002.                                      | <b>District:</b>                           | <input style="width: 70%;" type="text"/> <input style="width: 10%; text-align: center;" type="text"/> <input style="width: 10%; text-align: center;" type="text"/>                                                                                                                                                                                                                                                                                                                                                                                                                                                                                                                                                                                                                                                                                                                                                                          |                                           |                                           |                                           |                                           |                                           |                                           |     |       |      |  |  |  |
| 003.                                      | <b>Region:</b>                             | <input style="width: 70%;" type="text"/> <input style="width: 10%; text-align: center;" type="text"/>                                                                                                                                                                                                                                                                                                                                                                                                                                                                                                                                                                                                                                                                                                                                                                                                                                       |                                           |                                           |                                           |                                           |                                           |                                           |     |       |      |  |  |  |
| 004.                                      | <b>Institution where respondent works:</b> | <input style="width: 100%;" type="text"/>                                                                                                                                                                                                                                                                                                                                                                                                                                                                                                                                                                                                                                                                                                                                                                                                                                                                                                   |                                           |                                           |                                           |                                           |                                           |                                           |     |       |      |  |  |  |
| 005.                                      | <b>Date of Interview:</b>                  | <table style="width: 100%; border: none;"> <tr> <td style="border: 1px solid black; width: 15%; text-align: center;"><input style="width: 100%;" type="text"/></td> <td style="border: 1px solid black; width: 15%; text-align: center;"><input style="width: 100%;" type="text"/></td> <td style="border: 1px solid black; width: 15%; text-align: center;"><input style="width: 100%;" type="text"/></td> <td style="border: 1px solid black; width: 15%; text-align: center;"><input style="width: 100%;" type="text"/></td> <td style="border: 1px solid black; width: 15%; text-align: center;"><input style="width: 100%;" type="text"/></td> <td style="border: 1px solid black; width: 15%; text-align: center;"><input style="width: 100%;" type="text"/></td> </tr> <tr> <td style="text-align: center;">Day</td> <td style="text-align: center;">Month</td> <td colspan="4" style="text-align: center;">Year</td> </tr> </table> | <input style="width: 100%;" type="text"/> | <input style="width: 100%;" type="text"/> | <input style="width: 100%;" type="text"/> | <input style="width: 100%;" type="text"/> | <input style="width: 100%;" type="text"/> | <input style="width: 100%;" type="text"/> | Day | Month | Year |  |  |  |
| <input style="width: 100%;" type="text"/> | <input style="width: 100%;" type="text"/>  | <input style="width: 100%;" type="text"/>                                                                                                                                                                                                                                                                                                                                                                                                                                                                                                                                                                                                                                                                                                                                                                                                                                                                                                   | <input style="width: 100%;" type="text"/> | <input style="width: 100%;" type="text"/> | <input style="width: 100%;" type="text"/> |                                           |                                           |                                           |     |       |      |  |  |  |
| Day                                       | Month                                      | Year                                                                                                                                                                                                                                                                                                                                                                                                                                                                                                                                                                                                                                                                                                                                                                                                                                                                                                                                        |                                           |                                           |                                           |                                           |                                           |                                           |     |       |      |  |  |  |
| 006.                                      | <b>Time Started:</b>                       | <input style="width: 15%;" type="text"/> <input style="width: 15%;" type="text"/> hr <input style="width: 15%;" type="text"/> <input style="width: 15%;" type="text"/> min                                                                                                                                                                                                                                                                                                                                                                                                                                                                                                                                                                                                                                                                                                                                                                  |                                           |                                           |                                           |                                           |                                           |                                           |     |       |      |  |  |  |
| 007.                                      | <b>Time Ended:</b>                         | <input style="width: 15%;" type="text"/> <input style="width: 15%;" type="text"/> hr <input style="width: 15%;" type="text"/> <input style="width: 15%;" type="text"/> min                                                                                                                                                                                                                                                                                                                                                                                                                                                                                                                                                                                                                                                                                                                                                                  |                                           |                                           |                                           |                                           |                                           |                                           |     |       |      |  |  |  |
| 008.                                      | <b>Interviewer's Name:</b>                 | <input style="width: 100%;" type="text"/>                                                                                                                                                                                                                                                                                                                                                                                                                                                                                                                                                                                                                                                                                                                                                                                                                                                                                                   |                                           |                                           |                                           |                                           |                                           |                                           |     |       |      |  |  |  |

**NOTE: TO BE ADMINISTERED BY INTERVIEWER ONLY.**

|      |                                                                                                                                            |                                                                                                                                                                                                                                                                                                                                                                |   |          |   |            |   |         |   |           |
|------|--------------------------------------------------------------------------------------------------------------------------------------------|----------------------------------------------------------------------------------------------------------------------------------------------------------------------------------------------------------------------------------------------------------------------------------------------------------------------------------------------------------------|---|----------|---|------------|---|---------|---|-----------|
| 009. | <b>Result Code:</b>                                                                                                                        | <table border="1" style="width: 100%; border-collapse: collapse;"> <tr><td style="width: 20px; text-align: center;">1</td><td>Complete</td></tr> <tr><td style="text-align: center;">2</td><td>Incomplete</td></tr> <tr><td style="text-align: center;">3</td><td>Refusal</td></tr> <tr><td style="text-align: center;">4</td><td>Not found</td></tr> </table> | 1 | Complete | 2 | Incomplete | 3 | Refusal | 4 | Not found |
| 1    | Complete                                                                                                                                   |                                                                                                                                                                                                                                                                                                                                                                |   |          |   |            |   |         |   |           |
| 2    | Incomplete                                                                                                                                 |                                                                                                                                                                                                                                                                                                                                                                |   |          |   |            |   |         |   |           |
| 3    | Refusal                                                                                                                                    |                                                                                                                                                                                                                                                                                                                                                                |   |          |   |            |   |         |   |           |
| 4    | Not found                                                                                                                                  |                                                                                                                                                                                                                                                                                                                                                                |   |          |   |            |   |         |   |           |
|      | <i>If not complete, please explain why:<br/>[If facility is demolished or closed down,<br/>please try to find out when this occurred.]</i> | <input style="width: 100%; height: 40px;" type="text"/>                                                                                                                                                                                                                                                                                                        |   |          |   |            |   |         |   |           |
|      | <b>Supervisor Signature:</b>                                                                                                               | <input style="width: 100%; height: 30px;" type="text"/>                                                                                                                                                                                                                                                                                                        |   |          |   |            |   |         |   |           |

*Interviewer's impression of the respondent's knowledge of rural areas*

|                                           |
|-------------------------------------------|
| <input style="width: 100%;" type="text"/> |
| <input style="width: 100%;" type="text"/> |
| <input style="width: 100%;" type="text"/> |

## Module 1: Basic Information

| Q # | Questions and Filters                                                                                                                                                                                                                                                                                                                                            | Responses and Codes                                                                                                                                                                                                                                                                                                                                                                                                                                                                                                                                                                                                                                                                                                                                                                                                                                                                                                                             |   |                            |       |                          |   |                              |    |                                |   |                  |   |                    |   |                               |   |        |   |                       |    |                                            |    |                                |
|-----|------------------------------------------------------------------------------------------------------------------------------------------------------------------------------------------------------------------------------------------------------------------------------------------------------------------------------------------------------------------|-------------------------------------------------------------------------------------------------------------------------------------------------------------------------------------------------------------------------------------------------------------------------------------------------------------------------------------------------------------------------------------------------------------------------------------------------------------------------------------------------------------------------------------------------------------------------------------------------------------------------------------------------------------------------------------------------------------------------------------------------------------------------------------------------------------------------------------------------------------------------------------------------------------------------------------------------|---|----------------------------|-------|--------------------------|---|------------------------------|----|--------------------------------|---|------------------|---|--------------------|---|-------------------------------|---|--------|---|-----------------------|----|--------------------------------------------|----|--------------------------------|
| 101 | Sex of respondent                                                                                                                                                                                                                                                                                                                                                | <table border="1" style="width: 100%; border-collapse: collapse;"> <tr> <td style="width: 5%; text-align: center;">1</td> <td>Male</td> </tr> <tr> <td style="text-align: center;">2</td> <td>Female</td> </tr> </table>                                                                                                                                                                                                                                                                                                                                                                                                                                                                                                                                                                                                                                                                                                                        | 1 | Male                       | 2     | Female                   |   |                              |    |                                |   |                  |   |                    |   |                               |   |        |   |                       |    |                                            |    |                                |
| 1   | Male                                                                                                                                                                                                                                                                                                                                                             |                                                                                                                                                                                                                                                                                                                                                                                                                                                                                                                                                                                                                                                                                                                                                                                                                                                                                                                                                 |   |                            |       |                          |   |                              |    |                                |   |                  |   |                    |   |                               |   |        |   |                       |    |                                            |    |                                |
| 2   | Female                                                                                                                                                                                                                                                                                                                                                           |                                                                                                                                                                                                                                                                                                                                                                                                                                                                                                                                                                                                                                                                                                                                                                                                                                                                                                                                                 |   |                            |       |                          |   |                              |    |                                |   |                  |   |                    |   |                               |   |        |   |                       |    |                                            |    |                                |
| 102 | How old are you?                                                                                                                                                                                                                                                                                                                                                 | <table border="1" style="width: 100%; border-collapse: collapse;"> <tr> <td style="width: 10%; text-align: center;"> </td> <td style="width: 10%; text-align: center;"> </td> <td>Years</td> </tr> </table>                                                                                                                                                                                                                                                                                                                                                                                                                                                                                                                                                                                                                                                                                                                                     |   |                            | Years |                          |   |                              |    |                                |   |                  |   |                    |   |                               |   |        |   |                       |    |                                            |    |                                |
|     |                                                                                                                                                                                                                                                                                                                                                                  | Years                                                                                                                                                                                                                                                                                                                                                                                                                                                                                                                                                                                                                                                                                                                                                                                                                                                                                                                                           |   |                            |       |                          |   |                              |    |                                |   |                  |   |                    |   |                               |   |        |   |                       |    |                                            |    |                                |
| 103 | <p>Of the following categories, which describes your primary profession/current work?</p> <p><b>[Interviewer: READ LIST. If more than one applies, circle the category that accounts for the greatest proportion of the respondent's time.]</b></p>                                                                                                              | <table border="1" style="width: 100%; border-collapse: collapse;"> <tr><td style="width: 5%; text-align: center;">1</td><td>Researcher</td></tr> <tr><td style="text-align: center;">2</td><td>OBGYN specialist</td></tr> <tr><td style="text-align: center;">3</td><td>Nurse</td></tr> <tr><td style="text-align: center;">4</td><td>Midwife</td></tr> <tr><td style="text-align: center;">5</td><td>Clinical Officer</td></tr> <tr><td style="text-align: center;">6</td><td>Medical Officer/GP</td></tr> <tr><td style="text-align: center;">7</td><td>Health Administrative Officer</td></tr> <tr><td style="text-align: center;">8</td><td>Lawyer</td></tr> <tr><td style="text-align: center;">9</td><td>Counselor/Social Work</td></tr> <tr><td style="text-align: center;">10</td><td>Activist/Advocacy (<i>specify</i>) _____</td></tr> <tr><td style="text-align: center;">96</td><td>Other (<i>specify</i>) _____</td></tr> </table> | 1 | Researcher                 | 2     | OBGYN specialist         | 3 | Nurse                        | 4  | Midwife                        | 5 | Clinical Officer | 6 | Medical Officer/GP | 7 | Health Administrative Officer | 8 | Lawyer | 9 | Counselor/Social Work | 10 | Activist/Advocacy ( <i>specify</i> ) _____ | 96 | Other ( <i>specify</i> ) _____ |
| 1   | Researcher                                                                                                                                                                                                                                                                                                                                                       |                                                                                                                                                                                                                                                                                                                                                                                                                                                                                                                                                                                                                                                                                                                                                                                                                                                                                                                                                 |   |                            |       |                          |   |                              |    |                                |   |                  |   |                    |   |                               |   |        |   |                       |    |                                            |    |                                |
| 2   | OBGYN specialist                                                                                                                                                                                                                                                                                                                                                 |                                                                                                                                                                                                                                                                                                                                                                                                                                                                                                                                                                                                                                                                                                                                                                                                                                                                                                                                                 |   |                            |       |                          |   |                              |    |                                |   |                  |   |                    |   |                               |   |        |   |                       |    |                                            |    |                                |
| 3   | Nurse                                                                                                                                                                                                                                                                                                                                                            |                                                                                                                                                                                                                                                                                                                                                                                                                                                                                                                                                                                                                                                                                                                                                                                                                                                                                                                                                 |   |                            |       |                          |   |                              |    |                                |   |                  |   |                    |   |                               |   |        |   |                       |    |                                            |    |                                |
| 4   | Midwife                                                                                                                                                                                                                                                                                                                                                          |                                                                                                                                                                                                                                                                                                                                                                                                                                                                                                                                                                                                                                                                                                                                                                                                                                                                                                                                                 |   |                            |       |                          |   |                              |    |                                |   |                  |   |                    |   |                               |   |        |   |                       |    |                                            |    |                                |
| 5   | Clinical Officer                                                                                                                                                                                                                                                                                                                                                 |                                                                                                                                                                                                                                                                                                                                                                                                                                                                                                                                                                                                                                                                                                                                                                                                                                                                                                                                                 |   |                            |       |                          |   |                              |    |                                |   |                  |   |                    |   |                               |   |        |   |                       |    |                                            |    |                                |
| 6   | Medical Officer/GP                                                                                                                                                                                                                                                                                                                                               |                                                                                                                                                                                                                                                                                                                                                                                                                                                                                                                                                                                                                                                                                                                                                                                                                                                                                                                                                 |   |                            |       |                          |   |                              |    |                                |   |                  |   |                    |   |                               |   |        |   |                       |    |                                            |    |                                |
| 7   | Health Administrative Officer                                                                                                                                                                                                                                                                                                                                    |                                                                                                                                                                                                                                                                                                                                                                                                                                                                                                                                                                                                                                                                                                                                                                                                                                                                                                                                                 |   |                            |       |                          |   |                              |    |                                |   |                  |   |                    |   |                               |   |        |   |                       |    |                                            |    |                                |
| 8   | Lawyer                                                                                                                                                                                                                                                                                                                                                           |                                                                                                                                                                                                                                                                                                                                                                                                                                                                                                                                                                                                                                                                                                                                                                                                                                                                                                                                                 |   |                            |       |                          |   |                              |    |                                |   |                  |   |                    |   |                               |   |        |   |                       |    |                                            |    |                                |
| 9   | Counselor/Social Work                                                                                                                                                                                                                                                                                                                                            |                                                                                                                                                                                                                                                                                                                                                                                                                                                                                                                                                                                                                                                                                                                                                                                                                                                                                                                                                 |   |                            |       |                          |   |                              |    |                                |   |                  |   |                    |   |                               |   |        |   |                       |    |                                            |    |                                |
| 10  | Activist/Advocacy ( <i>specify</i> ) _____                                                                                                                                                                                                                                                                                                                       |                                                                                                                                                                                                                                                                                                                                                                                                                                                                                                                                                                                                                                                                                                                                                                                                                                                                                                                                                 |   |                            |       |                          |   |                              |    |                                |   |                  |   |                    |   |                               |   |        |   |                       |    |                                            |    |                                |
| 96  | Other ( <i>specify</i> ) _____                                                                                                                                                                                                                                                                                                                                   |                                                                                                                                                                                                                                                                                                                                                                                                                                                                                                                                                                                                                                                                                                                                                                                                                                                                                                                                                 |   |                            |       |                          |   |                              |    |                                |   |                  |   |                    |   |                               |   |        |   |                       |    |                                            |    |                                |
| 104 | <p>How long have you been working in this field?</p> <p><b>[Interviewer: Please record completed years. If less than one year, write "0".]</b></p>                                                                                                                                                                                                               | <table border="1" style="width: 100%; border-collapse: collapse;"> <tr> <td style="width: 10%; text-align: center;"> </td> <td style="width: 10%; text-align: center;"> </td> <td>Years</td> </tr> </table>                                                                                                                                                                                                                                                                                                                                                                                                                                                                                                                                                                                                                                                                                                                                     |   |                            | Years |                          |   |                              |    |                                |   |                  |   |                    |   |                               |   |        |   |                       |    |                                            |    |                                |
|     |                                                                                                                                                                                                                                                                                                                                                                  | Years                                                                                                                                                                                                                                                                                                                                                                                                                                                                                                                                                                                                                                                                                                                                                                                                                                                                                                                                           |   |                            |       |                          |   |                              |    |                                |   |                  |   |                    |   |                               |   |        |   |                       |    |                                            |    |                                |
| 105 | <p>In which of the following sectors do you work primarily?</p> <p><b>[Interviewer: READ LIST. If the respondent works in more than one sector, circle the category corresponding to the sector where he/she contributes the most time. If the respondent works equally in both the private and the public sector, they can fill that in under "Other".]</b></p> | <table border="1" style="width: 100%; border-collapse: collapse;"> <tr><td style="width: 5%; text-align: center;">1</td><td>Public sector (government)</td></tr> <tr><td style="text-align: center;">2</td><td>Private for profit</td></tr> <tr><td style="text-align: center;">3</td><td>Private for non-profit (NGO)</td></tr> <tr><td style="text-align: center;">96</td><td>Other (<i>specify</i>) _____</td></tr> </table>                                                                                                                                                                                                                                                                                                                                                                                                                                                                                                                 | 1 | Public sector (government) | 2     | Private for profit       | 3 | Private for non-profit (NGO) | 96 | Other ( <i>specify</i> ) _____ |   |                  |   |                    |   |                               |   |        |   |                       |    |                                            |    |                                |
| 1   | Public sector (government)                                                                                                                                                                                                                                                                                                                                       |                                                                                                                                                                                                                                                                                                                                                                                                                                                                                                                                                                                                                                                                                                                                                                                                                                                                                                                                                 |   |                            |       |                          |   |                              |    |                                |   |                  |   |                    |   |                               |   |        |   |                       |    |                                            |    |                                |
| 2   | Private for profit                                                                                                                                                                                                                                                                                                                                               |                                                                                                                                                                                                                                                                                                                                                                                                                                                                                                                                                                                                                                                                                                                                                                                                                                                                                                                                                 |   |                            |       |                          |   |                              |    |                                |   |                  |   |                    |   |                               |   |        |   |                       |    |                                            |    |                                |
| 3   | Private for non-profit (NGO)                                                                                                                                                                                                                                                                                                                                     |                                                                                                                                                                                                                                                                                                                                                                                                                                                                                                                                                                                                                                                                                                                                                                                                                                                                                                                                                 |   |                            |       |                          |   |                              |    |                                |   |                  |   |                    |   |                               |   |        |   |                       |    |                                            |    |                                |
| 96  | Other ( <i>specify</i> ) _____                                                                                                                                                                                                                                                                                                                                   |                                                                                                                                                                                                                                                                                                                                                                                                                                                                                                                                                                                                                                                                                                                                                                                                                                                                                                                                                 |   |                            |       |                          |   |                              |    |                                |   |                  |   |                    |   |                               |   |        |   |                       |    |                                            |    |                                |
| 106 | <p>In which area do you <b>currently</b> work--a rural or urban area?</p> <p><b>[Interviewer: If respondent works in both areas, circle the category of the area where he/she spends the most time. If the respondent works exactly part-time in both areas, then circle "Both"]</b></p>                                                                         | <table border="1" style="width: 100%; border-collapse: collapse;"> <tr><td style="width: 5%; text-align: center;">1</td><td>Rural</td></tr> <tr><td style="text-align: center;">2</td><td>Urban</td></tr> <tr><td style="text-align: center;">3</td><td>Both</td></tr> </table>                                                                                                                                                                                                                                                                                                                                                                                                                                                                                                                                                                                                                                                                 | 1 | Rural                      | 2     | Urban                    | 3 | Both                         |    |                                |   |                  |   |                    |   |                               |   |        |   |                       |    |                                            |    |                                |
| 1   | Rural                                                                                                                                                                                                                                                                                                                                                            |                                                                                                                                                                                                                                                                                                                                                                                                                                                                                                                                                                                                                                                                                                                                                                                                                                                                                                                                                 |   |                            |       |                          |   |                              |    |                                |   |                  |   |                    |   |                               |   |        |   |                       |    |                                            |    |                                |
| 2   | Urban                                                                                                                                                                                                                                                                                                                                                            |                                                                                                                                                                                                                                                                                                                                                                                                                                                                                                                                                                                                                                                                                                                                                                                                                                                                                                                                                 |   |                            |       |                          |   |                              |    |                                |   |                  |   |                    |   |                               |   |        |   |                       |    |                                            |    |                                |
| 3   | Both                                                                                                                                                                                                                                                                                                                                                             |                                                                                                                                                                                                                                                                                                                                                                                                                                                                                                                                                                                                                                                                                                                                                                                                                                                                                                                                                 |   |                            |       |                          |   |                              |    |                                |   |                  |   |                    |   |                               |   |        |   |                       |    |                                            |    |                                |
| 107 | <p>During the last five years, have you ever worked in a rural area for six months or more?</p>                                                                                                                                                                                                                                                                  | <table border="1" style="width: 100%; border-collapse: collapse;"> <tr><td style="width: 5%; text-align: center;">1</td><td>Yes</td></tr> <tr><td style="text-align: center;">2</td><td>No → <b>SKIP TO Q109</b></td></tr> </table>                                                                                                                                                                                                                                                                                                                                                                                                                                                                                                                                                                                                                                                                                                             | 1 | Yes                        | 2     | No → <b>SKIP TO Q109</b> |   |                              |    |                                |   |                  |   |                    |   |                               |   |        |   |                       |    |                                            |    |                                |
| 1   | Yes                                                                                                                                                                                                                                                                                                                                                              |                                                                                                                                                                                                                                                                                                                                                                                                                                                                                                                                                                                                                                                                                                                                                                                                                                                                                                                                                 |   |                            |       |                          |   |                              |    |                                |   |                  |   |                    |   |                               |   |        |   |                       |    |                                            |    |                                |
| 2   | No → <b>SKIP TO Q109</b>                                                                                                                                                                                                                                                                                                                                         |                                                                                                                                                                                                                                                                                                                                                                                                                                                                                                                                                                                                                                                                                                                                                                                                                                                                                                                                                 |   |                            |       |                          |   |                              |    |                                |   |                  |   |                    |   |                               |   |        |   |                       |    |                                            |    |                                |
| 108 | <p>In total, how long have you worked in rural areas?</p> <p><b>[Interviewer: Please record completed years. If less than one year, write "0".]</b></p>                                                                                                                                                                                                          | <table border="1" style="width: 100%; border-collapse: collapse;"> <tr> <td style="width: 10%; text-align: center;"> </td> <td style="width: 10%; text-align: center;"> </td> <td>Years</td> </tr> </table>                                                                                                                                                                                                                                                                                                                                                                                                                                                                                                                                                                                                                                                                                                                                     |   |                            | Years |                          |   |                              |    |                                |   |                  |   |                    |   |                               |   |        |   |                       |    |                                            |    |                                |
|     |                                                                                                                                                                                                                                                                                                                                                                  | Years                                                                                                                                                                                                                                                                                                                                                                                                                                                                                                                                                                                                                                                                                                                                                                                                                                                                                                                                           |   |                            |       |                          |   |                              |    |                                |   |                  |   |                    |   |                               |   |        |   |                       |    |                                            |    |                                |

|     |                                                                                                                                                                                           |    |                                                                                                 |
|-----|-------------------------------------------------------------------------------------------------------------------------------------------------------------------------------------------|----|-------------------------------------------------------------------------------------------------|
| 109 | <p>Have you been exposed to information on the practice of abortion.....</p> <p><b><i>[Interviewer: READ THE LIST. Multiple responses allowed. Please circle all that apply.]</i></b></p> | 1  | Through work in a public health facility                                                        |
|     |                                                                                                                                                                                           | 1  | Through work in a private health facility                                                       |
|     |                                                                                                                                                                                           | 1  | Through a non-medical framework (i.e. research, policy-making, counseling, advocacy, law, etc.) |
|     |                                                                                                                                                                                           | 1  | Through colleagues in any of the above settings                                                 |
|     |                                                                                                                                                                                           | 96 | Other (specify): _____                                                                          |

## Module II: Provision of Induced Abortion

*In Uganda, very little is known about the provision of induced abortion—that is, steps taken or procedures done to end a pregnancy. Induced abortion may be done at any gestation, and it may be done by both trained and untrained providers in safe and unsafe conditions. We would like to have your input about several aspects of this area of reproductive behavior, insofar as you are able to give an informed opinion.*

**[Interviewer: For this module, remind the respondent that all questions are to be answered with respect to the entire country. If the respondent indicates that he/she is unable to estimate on that level, then encourage the respondent to respond at a regional level, then denote in the margins that respondent has answered the question at a regional level. This should only be done if the respondent is completely unable to provide a country level response**

201 There are various methods currently used in Uganda to try to induce abortion. From the list of methods I will read, please tell me which methods you know that are used **within this country**, regardless of the type of practitioner who may use it. I will first ask you about methods used in **urban areas** and then I will repeat the list for **rural areas**. Please let me know if there are any other methods you would like to specify.

202

**[Interviewer: Please READ out each type of method for urban areas, circle the appropriate response for all that apply and then repeat the same list of methods for rural areas.]**

DK=Do not know

**Q.201**

**Q.202**

| Type of Method                                                                                                        | Urban Areas |    |    | Rural Areas |    |      |
|-----------------------------------------------------------------------------------------------------------------------|-------------|----|----|-------------|----|------|
|                                                                                                                       | Yes         | No | DK | Yes         | No | DK   |
| <b>Standard methods</b>                                                                                               |             |    |    |             |    |      |
| a. Manual vacuum aspiration (MVA)                                                                                     | 1           | 2  | 98 |             | 1  | 2 98 |
| b. Dilation and curettage (D&C)                                                                                       | 1           | 2  | 98 |             | 1  | 2 98 |
| c. Dilation and Evacuation (D&E)                                                                                      | 1           | 2  | 98 |             | 1  | 2 98 |
| <b>Oral introduction of drugs, solutions or other substances (i.e. through the mouth)</b>                             |             |    |    |             |    |      |
| d. Misoprostol (e.g. Cytotec)                                                                                         | 1           | 2  | 98 |             | 1  | 2 98 |
| e. Other hormonal drugs (i.e. contraceptive pills)                                                                    | 1           | 2  | 98 |             | 1  | 2 98 |
| f. Herbs /Teas /Solutions                                                                                             | 1           | 2  | 98 |             | 1  | 2 98 |
| <b>Vaginal introduction of drugs, solutions or other materials</b>                                                    |             |    |    |             |    |      |
| g. Misoprostol (e.g. Cytotec)                                                                                         | 1           | 2  | 98 |             | 1  | 2 98 |
| h. Other hormonal drugs (i.e. contraceptive pills)                                                                    | 1           | 2  | 98 |             | 1  | 2 98 |
| i. Herbs/Teas/ Solutions (Using form of insertion)                                                                    | 1           | 2  | 98 |             | 1  | 2 98 |
| j. Catheter                                                                                                           | 1           | 2  | 98 |             | 1  | 2 98 |
| k. Caustic agents (e.g. Washing detergent)                                                                            | 1           | 2  | 98 |             | 1  | 2 98 |
| l. Overdose of pharmaceuticals (e.g. Quinine, Fansider)                                                               | 1           | 2  | 98 |             | 1  | 2 98 |
| m. Other solid objects ( <i>urban</i> ) _____                                                                         | 1           | 2  | 98 |             | 1  | 2 98 |
| Other solid objects ( <i>rural</i> ) _____                                                                            |             |    |    |             |    |      |
| <b>Physical methods</b>                                                                                               |             |    |    |             |    |      |
| n. Heavy massage or pressure on abdomen, physical blows, falling                                                      | 1           | 2  | 98 |             | 1  | 2 98 |
| o. Excessive exercise                                                                                                 | 1           | 2  | 98 |             | 1  | 2 98 |
| <b>Other methods</b>                                                                                                  |             |    |    |             |    |      |
| p. Injectables specify _____                                                                                          | 1           | 2  | 98 |             | 1  | 2 98 |
| q. Other means (Specify) any additional method/s not listed above<br>( <i>urban</i> ) _____<br>( <i>rural</i> ) _____ | 1           | 2  | 98 |             | 1  | 2 98 |

|     |                                                      |                          |                          |
|-----|------------------------------------------------------|--------------------------|--------------------------|
| 203 | What do you think is the MOST common method used by: | <b>Q203. Urban Areas</b> | <b>Q204. Rural Areas</b> |
| 204 | TBA/Traditional healer                               |                          |                          |
|     | Clinical officer/Nurse/Midwife                       |                          |                          |
|     | Doctor                                               |                          |                          |
|     | Woman herself (self-induction)                       |                          |                          |

**[Interviewer:use the letters in Q.202 or enter "98" if the person cannot provide a response]**

The following questions are asked separately about women who live in urban and rural areas. Each one asks you to consider two broad socioeconomic groups – the poor and the relatively well-off (non-poor). **Considering this country as a whole, I want you to give us your opinion on the following.**

**[Interviewer:** There are no exact definitions for “poor” and “non-poor,” but by “poor” we mean women with seven or less years of schooling. **Only if necessary**, explain that poor women are those who have economic difficulties to afford the costs of a safe abortion.

**URBAN AREAS**

|            |                                                                                                                                                                                                                              |                                                                                                                                                                                                                             |                                                                                                                                                                                                                  |
|------------|------------------------------------------------------------------------------------------------------------------------------------------------------------------------------------------------------------------------------|-----------------------------------------------------------------------------------------------------------------------------------------------------------------------------------------------------------------------------|------------------------------------------------------------------------------------------------------------------------------------------------------------------------------------------------------------------|
| 205<br>206 | <p><b>[Interviewer: Please read out each type of provider for urban poor then reread list for urban non-poor. Probe for an answer if "don't know".]</b></p> <p>C=Commonly, S=Sometimes, R=Rarely, N=Never, DK=Don't know</p> | <p><b>Q.205</b> Considering first <b>URBAN</b> areas, indicate whether, in your opinion, each of the following types of provider is commonly, sometimes, rarely or never used by <b>poor</b> women seeking an abortion.</p> | <p><b>Q.206</b> And now for <b>non-poor URBAN</b> women. Please indicate whether each of the following types of provider is commonly, sometimes, rarely or never used by non poor women seeking an abortion.</p> |
|------------|------------------------------------------------------------------------------------------------------------------------------------------------------------------------------------------------------------------------------|-----------------------------------------------------------------------------------------------------------------------------------------------------------------------------------------------------------------------------|------------------------------------------------------------------------------------------------------------------------------------------------------------------------------------------------------------------|

|                                           | Urban poor women |   |     |    |   |   | Urban non-poor women |    |   |   |     |    |
|-------------------------------------------|------------------|---|-----|----|---|---|----------------------|----|---|---|-----|----|
| Type of provider                          | C                | S | R/N | DK | C | S | R/N                  | DK | C | S | R/N | DK |
| a. Doctor                                 | 1                | 2 | 3   | 98 | 1 | 2 | 3                    | 98 | 1 | 2 | 3   | 98 |
| b. Clinical officer                       | 1                | 2 | 3   | 98 | 1 | 2 | 3                    | 98 | 1 | 2 | 3   | 98 |
| c. Nurse                                  | 1                | 2 | 3   | 98 | 1 | 2 | 3                    | 98 | 1 | 2 | 3   | 98 |
| d. Certified/Trained Midwife              | 1                | 2 | 3   | 98 | 1 | 2 | 3                    | 98 | 1 | 2 | 3   | 98 |
| e. Pharmacist/Dispenser/drugstore/chemist | 1                | 2 | 3   | 98 | 1 | 2 | 3                    | 98 | 1 | 2 | 3   | 98 |
| f. TBA/traditional healer                 | 1                | 2 | 3   | 98 | 1 | 2 | 3                    | 98 | 1 | 2 | 3   | 98 |
| g. Woman - self-induced                   | 1                | 2 | 3   | 98 | 1 | 2 | 3                    | 98 | 1 | 2 | 3   | 98 |
| h. Other ( <i>poor</i> ): _____           | 1                | 2 | 3   | 98 | 1 | 2 | 3                    | 98 | 1 | 2 | 3   | 98 |
| Other ( <i>non-poor</i> ): _____          |                  |   |     |    |   |   |                      |    |   |   |     |    |

|            |                                                                                                                                                                                                                              |                                                                                                                                                                         |                                                                                                                                                           |
|------------|------------------------------------------------------------------------------------------------------------------------------------------------------------------------------------------------------------------------------|-------------------------------------------------------------------------------------------------------------------------------------------------------------------------|-----------------------------------------------------------------------------------------------------------------------------------------------------------|
| 207<br>208 | <p><b>[Interviewer: Please check with Q 205 and Q206 and request an amount or price range for only those providers who were rated as used commonly or used sometimes. Probe if the respondent answers "don't know."]</b></p> | <p><b>Q.207.</b> How much do you think <b>poor women in URBAN areas</b> pay for a first-trimester abortion (14 weeks or less) from each of the following providers.</p> | <p><b>Q.208.</b> Now, let's turn to <b>non-poor women</b>. How much do you think they pay for first-trimester abortions from each of these providers?</p> |
|------------|------------------------------------------------------------------------------------------------------------------------------------------------------------------------------------------------------------------------------|-------------------------------------------------------------------------------------------------------------------------------------------------------------------------|-----------------------------------------------------------------------------------------------------------------------------------------------------------|

|                                           | Urban poor women | Urban non-poor women |
|-------------------------------------------|------------------|----------------------|
| Type of Provider                          |                  |                      |
| a. Doctor                                 |                  |                      |
| b. Clinical officer                       |                  |                      |
| c. Nurse                                  |                  |                      |
| d. Certified/Trained Midwife              |                  |                      |
| e. Pharmacist/Dispenser/drugstore/chemist |                  |                      |
| f. TBA/traditional healer                 |                  |                      |
| g. Woman - self-induced                   |                  |                      |
| h. Other ( <i>poor</i> ): _____           |                  |                      |
| Other ( <i>non-poor</i> ): _____          |                  |                      |

|         |                                                                                                                                                                            |                                                                                                                                                                                               |                                                                                                                                                                                    |
|---------|----------------------------------------------------------------------------------------------------------------------------------------------------------------------------|-----------------------------------------------------------------------------------------------------------------------------------------------------------------------------------------------|------------------------------------------------------------------------------------------------------------------------------------------------------------------------------------|
| 209-210 | <b>[Interviewer: Please read out each type of provider. Confirm that all providers sum to 100%. If they do not, probe for a correction, and adjust the answers below.]</b> | <b>Q.209</b> What percent of all induced abortions do you think are being performed by the following providers for <b>poor URBAN</b> women? Please note that all percentages must add to 100% | <b>Q.210</b> Now, let's turn to non-poor women. What percent of all induced abortions do you think are being performed by the following providers for <b>non-poor URBAN</b> women? |
|         | <b>Type of Provider</b>                                                                                                                                                    | <b>Urban poor women</b>                                                                                                                                                                       | <b>Urban non-poor women</b>                                                                                                                                                        |
|         | a. Doctor                                                                                                                                                                  | %                                                                                                                                                                                             | %                                                                                                                                                                                  |
|         | b. Clinical officer                                                                                                                                                        | %                                                                                                                                                                                             | %                                                                                                                                                                                  |
|         | c. Nurse                                                                                                                                                                   | %                                                                                                                                                                                             | %                                                                                                                                                                                  |
|         | d. Certified/Trained Midwife                                                                                                                                               | %                                                                                                                                                                                             | %                                                                                                                                                                                  |
|         | e. Pharmacist/Dispenser/drugstore/chemist                                                                                                                                  | %                                                                                                                                                                                             | %                                                                                                                                                                                  |
|         | f. TBA/traditional healer                                                                                                                                                  | %                                                                                                                                                                                             | %                                                                                                                                                                                  |
|         | g. Woman - self-induced                                                                                                                                                    | %                                                                                                                                                                                             | %                                                                                                                                                                                  |
|         | h. Other (poor):                                                                                                                                                           | %                                                                                                                                                                                             | %                                                                                                                                                                                  |
|         | Other (non-poor):                                                                                                                                                          |                                                                                                                                                                                               |                                                                                                                                                                                    |
|         | TOTAL                                                                                                                                                                      | 100%                                                                                                                                                                                          | 100%                                                                                                                                                                               |

The next set of questions focuses on women living in **rural** areas in Uganda.

**RURAL AREAS**

|         |                                                                                                                                                                                                                       |                                                                                                                                                               |                                                                                                                                                                                                              |
|---------|-----------------------------------------------------------------------------------------------------------------------------------------------------------------------------------------------------------------------|---------------------------------------------------------------------------------------------------------------------------------------------------------------|--------------------------------------------------------------------------------------------------------------------------------------------------------------------------------------------------------------|
| 211-212 | <b>[Interviewer: Please read out each type of provider for rural poor then reread list for rural non-poor. Probe for an answer if "don't know".]</b><br><br>C=Commonly, S=Sometimes, R=Rarely, N=Never, DK=Don't know | <b>Q.211</b> Please indicate if each of the following types of provider is commonly, sometimes, rarely or never used by poor rural women seeking an abortion. | <b>Q.212</b> Now considering <b>non-poor RURAL</b> women. Please indicate whether each of the following type of provider is commonly, sometimes, rarely or never used by non poor women seeking an abortion. |
|         | <b>Type of provider</b>                                                                                                                                                                                               | <b>Rural poor women</b>                                                                                                                                       | <b>Rural non-poor women</b>                                                                                                                                                                                  |
|         |                                                                                                                                                                                                                       | C S R/N DK                                                                                                                                                    | C S R/N DK                                                                                                                                                                                                   |
|         | a. Doctor                                                                                                                                                                                                             | 1 2 3 98                                                                                                                                                      | 1 2 3 98                                                                                                                                                                                                     |
|         | b. Clinical officer                                                                                                                                                                                                   | 1 2 3 98                                                                                                                                                      | 1 2 3 98                                                                                                                                                                                                     |
|         | c. Nurse                                                                                                                                                                                                              | 1 2 3 98                                                                                                                                                      | 1 2 3 98                                                                                                                                                                                                     |
|         | d. Certified/Trained Midwife                                                                                                                                                                                          | 1 2 3 98                                                                                                                                                      | 1 2 3 98                                                                                                                                                                                                     |
|         | e. Pharmacist/Dispenser/drugstore/chemist                                                                                                                                                                             | 1 2 3 98                                                                                                                                                      | 1 2 3 98                                                                                                                                                                                                     |
|         | f. TBA/traditional healer                                                                                                                                                                                             | 1 2 3 98                                                                                                                                                      | 1 2 3 98                                                                                                                                                                                                     |
|         | g. Woman - self-induced                                                                                                                                                                                               | 1 2 3 98                                                                                                                                                      | 1 2 3 98                                                                                                                                                                                                     |
|         | h. Other (poor):                                                                                                                                                                                                      | 1 2 3 98                                                                                                                                                      | 1 2 3 98                                                                                                                                                                                                     |
|         | Other (non-poor):                                                                                                                                                                                                     |                                                                                                                                                               |                                                                                                                                                                                                              |

|         |                                                                                                                                                                                                                                     |                                                                                                                                                                  |                                                                                                                                               |
|---------|-------------------------------------------------------------------------------------------------------------------------------------------------------------------------------------------------------------------------------------|------------------------------------------------------------------------------------------------------------------------------------------------------------------|-----------------------------------------------------------------------------------------------------------------------------------------------|
| 213-214 | <b>[Interviewer: Please check with Q 211 and Q212 and request an amount or price range for only those providers who were rated as used commonly or used sometimes. Probe for an answer if the respondent answers "don't know."]</b> | <b>Q.213.</b> How much do you think <b>poor women in RURAL</b> areas pay for a first trimester abortion (14 weeks of less) from each of the following providers. | <b>Q.214.</b> Now, focus on <b>non-poor</b> women. How much do you think they pay for first trimester abortions from each of these providers? |
|         | <b>Type of Provider</b>                                                                                                                                                                                                             | <b>Rural poor women</b>                                                                                                                                          | <b>Rural non-poor women</b>                                                                                                                   |
|         | a. Doctor                                                                                                                                                                                                                           |                                                                                                                                                                  |                                                                                                                                               |
|         | b. Clinical officer                                                                                                                                                                                                                 |                                                                                                                                                                  |                                                                                                                                               |
|         | c. Nurse                                                                                                                                                                                                                            |                                                                                                                                                                  |                                                                                                                                               |
|         | d. Certified/Trained Midwife                                                                                                                                                                                                        |                                                                                                                                                                  |                                                                                                                                               |
|         | e. Pharmacist/Dispenser/drugstore/chemist                                                                                                                                                                                           |                                                                                                                                                                  |                                                                                                                                               |
|         | f. TBA/traditional healer                                                                                                                                                                                                           |                                                                                                                                                                  |                                                                                                                                               |
|         | g. Woman - self-induced                                                                                                                                                                                                             |                                                                                                                                                                  |                                                                                                                                               |
|         | h. Other (poor):                                                                                                                                                                                                                    |                                                                                                                                                                  |                                                                                                                                               |
|         | Other (non-poor):                                                                                                                                                                                                                   |                                                                                                                                                                  |                                                                                                                                               |

|             |                                                                                                                                                                            |                                                                                                                                                                                               |                                                                                                                                                                                    |
|-------------|----------------------------------------------------------------------------------------------------------------------------------------------------------------------------|-----------------------------------------------------------------------------------------------------------------------------------------------------------------------------------------------|------------------------------------------------------------------------------------------------------------------------------------------------------------------------------------|
| 215-<br>216 | <b>[Interviewer: Please read out each type of provider. Confirm that all providers sum to 100%. If they do not, probe for a correction, and adjust the answers below.]</b> | <b>Q.215</b> What percent of all induced abortions do you think are being performed by the following providers for <b>poor RURAL</b> women? Please note that all percentages must add to 100% | <b>Q.216</b> Now, let's turn to non-poor women. What percent of all induced abortions do you think are being performed by the following providers for <b>non-poor RURAL</b> women? |
|             | <b>Type of Provider</b>                                                                                                                                                    | <b>Rural poor women</b>                                                                                                                                                                       | <b>Rural non-poor women</b>                                                                                                                                                        |
|             | a. Doctor                                                                                                                                                                  | %                                                                                                                                                                                             | %                                                                                                                                                                                  |
|             | b. Clinical officer                                                                                                                                                        | %                                                                                                                                                                                             | %                                                                                                                                                                                  |
|             | c. Nurse                                                                                                                                                                   | %                                                                                                                                                                                             | %                                                                                                                                                                                  |
|             | d. Certified/Trained Midwife                                                                                                                                               | %                                                                                                                                                                                             | %                                                                                                                                                                                  |
|             | e. Pharmacist/Dispenser/drugstore/chemist                                                                                                                                  | %                                                                                                                                                                                             | %                                                                                                                                                                                  |
|             | f. TBA/traditional healer                                                                                                                                                  | %                                                                                                                                                                                             | %                                                                                                                                                                                  |
|             | g. Woman - self-induced                                                                                                                                                    | %                                                                                                                                                                                             | %                                                                                                                                                                                  |
|             | h. Other ( <i>poor</i> ):<br>Other ( <i>non-poor</i> ):                                                                                                                    | %                                                                                                                                                                                             | %                                                                                                                                                                                  |
|             | <b>TOTAL</b>                                                                                                                                                               | <b>100%</b>                                                                                                                                                                                   | <b>100%</b>                                                                                                                                                                        |



## Module III: Abortion Complications

Now, I would like to talk to you about abortion complications. As you know, complications from an induced abortion range in severity. When we speak of abortion complications, we are referring to those consequences **severe enough to need treatment in a health facility**, regardless of whether the woman obtains health care. We define complications to include not only extremely serious cases such as sepsis or a perforated uterus, but also those cases termed "incomplete abortions." Incomplete abortions are usually identified by heavy bleeding and present a somewhat less severe health risk to the woman, but still require hospitalization. In answering the following questions, please keep this definition in mind.

|     |                                                                                                                                                                                                                                                                                                                                                                                 |                                                                                                                                                                                                                                                                                                                                                                                              |                    |   |   |                    |   |   |
|-----|---------------------------------------------------------------------------------------------------------------------------------------------------------------------------------------------------------------------------------------------------------------------------------------------------------------------------------------------------------------------------------|----------------------------------------------------------------------------------------------------------------------------------------------------------------------------------------------------------------------------------------------------------------------------------------------------------------------------------------------------------------------------------------------|--------------------|---|---|--------------------|---|---|
| 301 | Considering <b>urban areas</b> , please indicate which forms of short term health complications apart from death, result commonly, sometimes or never from induced abortion in Uganda.<br><br>Now considering <b>rural areas in Uganda</b> ...<br><b>[Interviewer: Please read each type of complication and circle the respondent's answers for each type of complication]</b> | C=commonly; S=sometimes; N=never<br><br>a. Incomplete abortion<br>b. Excessive loss of blood<br>c. Infection of the uterus and/or surrounding areas<br>d. Sepsis or septic shock<br>e. Damage to gut (intestines)<br>f. Damage to vagina and cervix<br>g. Damage to uterus (e.g. Perforation)<br>h. Pain in lower abdomen<br>i. Other<br><br>(specify, urban) _____<br>(specify rural) _____ | <b>Urban areas</b> |   |   | <b>Rural Areas</b> |   |   |
|     |                                                                                                                                                                                                                                                                                                                                                                                 |                                                                                                                                                                                                                                                                                                                                                                                              | C                  | S | N | C                  | S | N |
|     |                                                                                                                                                                                                                                                                                                                                                                                 |                                                                                                                                                                                                                                                                                                                                                                                              | 1                  | 2 | 3 | 1                  | 2 | 3 |
|     |                                                                                                                                                                                                                                                                                                                                                                                 |                                                                                                                                                                                                                                                                                                                                                                                              | 1                  | 2 | 3 | 1                  | 2 | 3 |
|     |                                                                                                                                                                                                                                                                                                                                                                                 |                                                                                                                                                                                                                                                                                                                                                                                              | 1                  | 2 | 3 | 1                  | 2 | 3 |
|     |                                                                                                                                                                                                                                                                                                                                                                                 |                                                                                                                                                                                                                                                                                                                                                                                              | 1                  | 2 | 3 | 1                  | 2 | 3 |
|     |                                                                                                                                                                                                                                                                                                                                                                                 |                                                                                                                                                                                                                                                                                                                                                                                              | 1                  | 2 | 3 | 1                  | 2 | 3 |
|     |                                                                                                                                                                                                                                                                                                                                                                                 |                                                                                                                                                                                                                                                                                                                                                                                              | 1                  | 2 | 3 | 1                  | 2 | 3 |
|     |                                                                                                                                                                                                                                                                                                                                                                                 |                                                                                                                                                                                                                                                                                                                                                                                              | 1                  | 2 | 3 | 1                  | 2 | 3 |
|     |                                                                                                                                                                                                                                                                                                                                                                                 |                                                                                                                                                                                                                                                                                                                                                                                              | 1                  | 2 | 3 | 1                  | 2 | 3 |

We are now asking a set of questions about women living in urban areas in Uganda.

### URBAN AREAS

|         |                                                                                                                                                                                                                                                                                                                                                      |                                                                                                                                                                                                                                                                                               |                                                                                                                                                                                                                                                                   |
|---------|------------------------------------------------------------------------------------------------------------------------------------------------------------------------------------------------------------------------------------------------------------------------------------------------------------------------------------------------------|-----------------------------------------------------------------------------------------------------------------------------------------------------------------------------------------------------------------------------------------------------------------------------------------------|-------------------------------------------------------------------------------------------------------------------------------------------------------------------------------------------------------------------------------------------------------------------|
| 302-303 | <b>[Interviewer: Ask for each type of provider separately; insert a number for each type of provider, even though it might be '0'.]</b>                                                                                                                                                                                                              | <b>Q.302</b> Think about <b>poor</b> women in <b>URBAN</b> areas. Out of 10 <b>poor urban</b> women who have an abortion performed by each type of provider that I will mention, how many would experience a medical complication that should receive medical treatment in a health facility? | <b>Q.303</b> Now, consider <b>non-poor URBAN</b> women. Out of 10 <b>non-poor urban</b> who have an abortion performed by the following providers, how many would experience and medical complication that should receive medical treatment in a health facility? |
|         |                                                                                                                                                                                                                                                                                                                                                      | <b>Out of 10 poor urban women</b>                                                                                                                                                                                                                                                             | <b>Out of 10 non-poor urban women</b>                                                                                                                                                                                                                             |
|         | a. Doctor                                                                                                                                                                                                                                                                                                                                            |                                                                                                                                                                                                                                                                                               |                                                                                                                                                                                                                                                                   |
|         | b. Clinical officer                                                                                                                                                                                                                                                                                                                                  |                                                                                                                                                                                                                                                                                               |                                                                                                                                                                                                                                                                   |
|         | c. Nurse                                                                                                                                                                                                                                                                                                                                             |                                                                                                                                                                                                                                                                                               |                                                                                                                                                                                                                                                                   |
|         | d. Certified/Trained Midwife                                                                                                                                                                                                                                                                                                                         |                                                                                                                                                                                                                                                                                               |                                                                                                                                                                                                                                                                   |
|         | e. Pharmacist/ Dispenser /drugstore/chemist                                                                                                                                                                                                                                                                                                          |                                                                                                                                                                                                                                                                                               |                                                                                                                                                                                                                                                                   |
|         | f. TBA/traditional healer                                                                                                                                                                                                                                                                                                                            |                                                                                                                                                                                                                                                                                               |                                                                                                                                                                                                                                                                   |
|         | g. Woman - self-induced                                                                                                                                                                                                                                                                                                                              |                                                                                                                                                                                                                                                                                               |                                                                                                                                                                                                                                                                   |
|         | h. Other (poor): _____                                                                                                                                                                                                                                                                                                                               |                                                                                                                                                                                                                                                                                               |                                                                                                                                                                                                                                                                   |
|         | Other (non-poor): _____                                                                                                                                                                                                                                                                                                                              |                                                                                                                                                                                                                                                                                               |                                                                                                                                                                                                                                                                   |
| 304     | a. Think about <b>poor</b> women in <b>URBAN</b> areas: out of 10 poor urban women who experience a <b>medical complication</b> due to an induced abortion, how many do you think <b>actually get treated</b> by a trained person in a health facility?<br><br>b. What would the number be for <b>non-poor</b> women living in an <b>URBAN</b> area? |                                                                                                                                                                                                                                                                                               | <b>Urban poor</b> women out of 10 treated in a health facility<br><br><b>Urban non-poor</b> women out of 10 treated in a health facility                                                                                                                          |

|         |                                                                                                                                                                                                                                                    |                                                                                                                                                                                                   |                                                                                                                                                                                                                            |
|---------|----------------------------------------------------------------------------------------------------------------------------------------------------------------------------------------------------------------------------------------------------|---------------------------------------------------------------------------------------------------------------------------------------------------------------------------------------------------|----------------------------------------------------------------------------------------------------------------------------------------------------------------------------------------------------------------------------|
| 305-306 | <p><b>[Interviewer: Read out each type of facility for both urban poor and urban non-poor. Probe for an answer if "don't know", only accept if necessary. ]</b></p> <p>C=commonly      R=rarely<br/>S=sometimes      N=never<br/>DK=don't know</p> | <p><b>Q.305</b> How often do <b>poor URBAN</b> women go to the following places to be treated for medical complications that result from induced abortion: commonly, sometimes, rarely/never?</p> | <p><b>Q.306</b> Now thinking about <b>non-poor URBAN</b> women. How often do they go to the these places to be treated for medical complications that result from induced abortion: commonly, sometimes, rarely/never?</p> |
|---------|----------------------------------------------------------------------------------------------------------------------------------------------------------------------------------------------------------------------------------------------------|---------------------------------------------------------------------------------------------------------------------------------------------------------------------------------------------------|----------------------------------------------------------------------------------------------------------------------------------------------------------------------------------------------------------------------------|

| Type of provider/facility                         | C | S | R/N | DK | C | S | R/N | DK |
|---------------------------------------------------|---|---|-----|----|---|---|-----|----|
| a. Doctor                                         | 1 | 2 | 3   | 98 | 1 | 2 | 3   | 98 |
| b. Clinical officer                               | 1 | 2 | 3   | 98 | 1 | 2 | 3   | 98 |
| c. Nurse                                          | 1 | 2 | 3   | 98 | 1 | 2 | 3   | 98 |
| d. Certified/Trained Midwife                      | 1 | 2 | 3   | 98 | 1 | 2 | 3   | 98 |
| e. Pharmacist/Dispenser/drugstore/chemist         | 1 | 2 | 3   | 98 | 1 | 2 | 3   | 98 |
| f. TBA/traditional healer                         | 1 | 2 | 3   | 98 | 1 | 2 | 3   | 98 |
| g. Woman - self-treated                           | 1 | 2 | 3   | 98 | 1 | 2 | 3   | 98 |
| h. Other (poor): _____<br>Other (non-poor): _____ | 1 | 2 | 3   | 98 | 1 | 2 | 3   | 98 |

We are now asking a set of questions about women living in rural areas.

**RURAL AREAS**

|         |                                                                                                                                     |                                                                                                                                                                                                                                                                                                      |                                                                                                                                                                                                                                                                          |
|---------|-------------------------------------------------------------------------------------------------------------------------------------|------------------------------------------------------------------------------------------------------------------------------------------------------------------------------------------------------------------------------------------------------------------------------------------------------|--------------------------------------------------------------------------------------------------------------------------------------------------------------------------------------------------------------------------------------------------------------------------|
| 307-308 | <p><b>[Interviewer: Ask for each type of provider separately; insert a number in each column, even though it might be '0'.]</b></p> | <p><b>Q.307</b> Think about <b>poor</b> women in <b>RURAL</b> areas. Out of 10 <b>poor RURAL</b> women who have an abortion performed by each type of provider that I will mention, how many would experience a medical complication that should receive medical treatment in a health facility?</p> | <p><b>Q.308</b> Now, consider <b>non-poor RURAL</b> women. Out of 10 <b>non-poor RURAL</b> who have an abortion performed by the following providers, how many would experience and medical complication that should receive medical treatment in a health facility?</p> |
|---------|-------------------------------------------------------------------------------------------------------------------------------------|------------------------------------------------------------------------------------------------------------------------------------------------------------------------------------------------------------------------------------------------------------------------------------------------------|--------------------------------------------------------------------------------------------------------------------------------------------------------------------------------------------------------------------------------------------------------------------------|

|                                                   | Out of 10 poor rural women |  |  |  | Out of 10 non-poor rural women |  |  |  |
|---------------------------------------------------|----------------------------|--|--|--|--------------------------------|--|--|--|
| a. Doctor                                         |                            |  |  |  |                                |  |  |  |
| b. Clinical officer                               |                            |  |  |  |                                |  |  |  |
| c. Nurse                                          |                            |  |  |  |                                |  |  |  |
| d. Certified/Trained Midwife                      |                            |  |  |  |                                |  |  |  |
| e. Pharmacist/ Dispenser /drugstore/chemist       |                            |  |  |  |                                |  |  |  |
| f. TBA/traditional healer                         |                            |  |  |  |                                |  |  |  |
| g. Woman - self-induced                           |                            |  |  |  |                                |  |  |  |
| h. Other (poor): _____<br>Other (non-poor): _____ |                            |  |  |  |                                |  |  |  |

|     |                                                                                                                                                                                                                                                                |                                                            |  |  |                                                                           |
|-----|----------------------------------------------------------------------------------------------------------------------------------------------------------------------------------------------------------------------------------------------------------------|------------------------------------------------------------|--|--|---------------------------------------------------------------------------|
| 309 | <p>a. Think about <b>poor</b> women in <b>RURAL</b> areas: out of 10 poor rural women who experience a <b>medical complication</b> due to an induced abortion, how many do you think <b>actually get treated</b> by a trained person in a health facility?</p> | <table border="1"> <tr> <td></td> <td></td> </tr> </table> |  |  | <p><b>Rural poor</b> women out of 10 treated in a health facility</p>     |
|     |                                                                                                                                                                                                                                                                |                                                            |  |  |                                                                           |
|     | <p>b. What would the number be for <b>non-poor</b> women living in a <b>RURAL</b> area?</p>                                                                                                                                                                    | <table border="1"> <tr> <td></td> <td></td> </tr> </table> |  |  | <p><b>Rural non-poor</b> women out of 10 treated in a health facility</p> |
|     |                                                                                                                                                                                                                                                                |                                                            |  |  |                                                                           |

| 310<br>311                                                                                                                                                                                                                                                                                  | <p><b>[Interviewer: Read out each type of facility for both rural poor and rural non-poor. Probe for an answer if "don't know", only accept if necessary.]</b></p> <p>C=commonly R=rarely<br/>S=sometimes N=never</p> | <p><b>Q.310</b> How often do <b>poor RURAL</b> women go to the following places to be treated for medical complications that result from induced abortion: commonly, sometimes, rarely/never?</p>                                                                                                                                                                                                                                                                                                                                                                                                                                                     | <p><b>Q.311</b> Now thinking about <b>non-poor RURAL</b> women. How often do they go to the these places to be treated for medical complications that result from induced abortion: commonly, sometimes, rarely/never?</p> |   |     |    |   |   |   |    |   |   |   |    |   |   |   |    |   |   |   |    |   |   |   |    |   |   |   |    |   |   |   |    |   |   |   |    |   |   |   |    |   |   |   |    |                                                                                                                                                                                                                                                                                                                                                                                                                                                                                                                                                                                                                                                       |   |   |     |    |   |   |   |    |   |   |   |    |   |   |   |    |   |   |   |    |   |   |   |    |   |   |   |    |   |   |   |    |   |   |   |    |   |   |   |    |   |   |   |    |
|---------------------------------------------------------------------------------------------------------------------------------------------------------------------------------------------------------------------------------------------------------------------------------------------|-----------------------------------------------------------------------------------------------------------------------------------------------------------------------------------------------------------------------|-------------------------------------------------------------------------------------------------------------------------------------------------------------------------------------------------------------------------------------------------------------------------------------------------------------------------------------------------------------------------------------------------------------------------------------------------------------------------------------------------------------------------------------------------------------------------------------------------------------------------------------------------------|----------------------------------------------------------------------------------------------------------------------------------------------------------------------------------------------------------------------------|---|-----|----|---|---|---|----|---|---|---|----|---|---|---|----|---|---|---|----|---|---|---|----|---|---|---|----|---|---|---|----|---|---|---|----|---|---|---|----|---|---|---|----|-------------------------------------------------------------------------------------------------------------------------------------------------------------------------------------------------------------------------------------------------------------------------------------------------------------------------------------------------------------------------------------------------------------------------------------------------------------------------------------------------------------------------------------------------------------------------------------------------------------------------------------------------------|---|---|-----|----|---|---|---|----|---|---|---|----|---|---|---|----|---|---|---|----|---|---|---|----|---|---|---|----|---|---|---|----|---|---|---|----|---|---|---|----|---|---|---|----|
| <p><b>Type of provider/facility</b></p>                                                                                                                                                                                                                                                     |                                                                                                                                                                                                                       | <table border="1"> <thead> <tr> <th>C</th> <th>S</th> <th>R/N</th> <th>DK</th> </tr> </thead> <tbody> <tr><td>1</td><td>2</td><td>3</td><td>98</td></tr> </tbody> </table> | C                                                                                                                                                                                                                          | S | R/N | DK | 1 | 2 | 3 | 98 | 1 | 2 | 3 | 98 | 1 | 2 | 3 | 98 | 1 | 2 | 3 | 98 | 1 | 2 | 3 | 98 | 1 | 2 | 3 | 98 | 1 | 2 | 3 | 98 | 1 | 2 | 3 | 98 | 1 | 2 | 3 | 98 | 1 | 2 | 3 | 98 | <table border="1"> <thead> <tr> <th>C</th> <th>S</th> <th>R/N</th> <th>DK</th> </tr> </thead> <tbody> <tr><td>1</td><td>2</td><td>3</td><td>98</td></tr> </tbody> </table> | C | S | R/N | DK | 1 | 2 | 3 | 98 | 1 | 2 | 3 | 98 | 1 | 2 | 3 | 98 | 1 | 2 | 3 | 98 | 1 | 2 | 3 | 98 | 1 | 2 | 3 | 98 | 1 | 2 | 3 | 98 | 1 | 2 | 3 | 98 | 1 | 2 | 3 | 98 | 1 | 2 | 3 | 98 |
| C                                                                                                                                                                                                                                                                                           | S                                                                                                                                                                                                                     | R/N                                                                                                                                                                                                                                                                                                                                                                                                                                                                                                                                                                                                                                                   | DK                                                                                                                                                                                                                         |   |     |    |   |   |   |    |   |   |   |    |   |   |   |    |   |   |   |    |   |   |   |    |   |   |   |    |   |   |   |    |   |   |   |    |   |   |   |    |   |   |   |    |                                                                                                                                                                                                                                                                                                                                                                                                                                                                                                                                                                                                                                                       |   |   |     |    |   |   |   |    |   |   |   |    |   |   |   |    |   |   |   |    |   |   |   |    |   |   |   |    |   |   |   |    |   |   |   |    |   |   |   |    |   |   |   |    |
| 1                                                                                                                                                                                                                                                                                           | 2                                                                                                                                                                                                                     | 3                                                                                                                                                                                                                                                                                                                                                                                                                                                                                                                                                                                                                                                     | 98                                                                                                                                                                                                                         |   |     |    |   |   |   |    |   |   |   |    |   |   |   |    |   |   |   |    |   |   |   |    |   |   |   |    |   |   |   |    |   |   |   |    |   |   |   |    |   |   |   |    |                                                                                                                                                                                                                                                                                                                                                                                                                                                                                                                                                                                                                                                       |   |   |     |    |   |   |   |    |   |   |   |    |   |   |   |    |   |   |   |    |   |   |   |    |   |   |   |    |   |   |   |    |   |   |   |    |   |   |   |    |   |   |   |    |
| 1                                                                                                                                                                                                                                                                                           | 2                                                                                                                                                                                                                     | 3                                                                                                                                                                                                                                                                                                                                                                                                                                                                                                                                                                                                                                                     | 98                                                                                                                                                                                                                         |   |     |    |   |   |   |    |   |   |   |    |   |   |   |    |   |   |   |    |   |   |   |    |   |   |   |    |   |   |   |    |   |   |   |    |   |   |   |    |   |   |   |    |                                                                                                                                                                                                                                                                                                                                                                                                                                                                                                                                                                                                                                                       |   |   |     |    |   |   |   |    |   |   |   |    |   |   |   |    |   |   |   |    |   |   |   |    |   |   |   |    |   |   |   |    |   |   |   |    |   |   |   |    |   |   |   |    |
| 1                                                                                                                                                                                                                                                                                           | 2                                                                                                                                                                                                                     | 3                                                                                                                                                                                                                                                                                                                                                                                                                                                                                                                                                                                                                                                     | 98                                                                                                                                                                                                                         |   |     |    |   |   |   |    |   |   |   |    |   |   |   |    |   |   |   |    |   |   |   |    |   |   |   |    |   |   |   |    |   |   |   |    |   |   |   |    |   |   |   |    |                                                                                                                                                                                                                                                                                                                                                                                                                                                                                                                                                                                                                                                       |   |   |     |    |   |   |   |    |   |   |   |    |   |   |   |    |   |   |   |    |   |   |   |    |   |   |   |    |   |   |   |    |   |   |   |    |   |   |   |    |   |   |   |    |
| 1                                                                                                                                                                                                                                                                                           | 2                                                                                                                                                                                                                     | 3                                                                                                                                                                                                                                                                                                                                                                                                                                                                                                                                                                                                                                                     | 98                                                                                                                                                                                                                         |   |     |    |   |   |   |    |   |   |   |    |   |   |   |    |   |   |   |    |   |   |   |    |   |   |   |    |   |   |   |    |   |   |   |    |   |   |   |    |   |   |   |    |                                                                                                                                                                                                                                                                                                                                                                                                                                                                                                                                                                                                                                                       |   |   |     |    |   |   |   |    |   |   |   |    |   |   |   |    |   |   |   |    |   |   |   |    |   |   |   |    |   |   |   |    |   |   |   |    |   |   |   |    |   |   |   |    |
| 1                                                                                                                                                                                                                                                                                           | 2                                                                                                                                                                                                                     | 3                                                                                                                                                                                                                                                                                                                                                                                                                                                                                                                                                                                                                                                     | 98                                                                                                                                                                                                                         |   |     |    |   |   |   |    |   |   |   |    |   |   |   |    |   |   |   |    |   |   |   |    |   |   |   |    |   |   |   |    |   |   |   |    |   |   |   |    |   |   |   |    |                                                                                                                                                                                                                                                                                                                                                                                                                                                                                                                                                                                                                                                       |   |   |     |    |   |   |   |    |   |   |   |    |   |   |   |    |   |   |   |    |   |   |   |    |   |   |   |    |   |   |   |    |   |   |   |    |   |   |   |    |   |   |   |    |
| 1                                                                                                                                                                                                                                                                                           | 2                                                                                                                                                                                                                     | 3                                                                                                                                                                                                                                                                                                                                                                                                                                                                                                                                                                                                                                                     | 98                                                                                                                                                                                                                         |   |     |    |   |   |   |    |   |   |   |    |   |   |   |    |   |   |   |    |   |   |   |    |   |   |   |    |   |   |   |    |   |   |   |    |   |   |   |    |   |   |   |    |                                                                                                                                                                                                                                                                                                                                                                                                                                                                                                                                                                                                                                                       |   |   |     |    |   |   |   |    |   |   |   |    |   |   |   |    |   |   |   |    |   |   |   |    |   |   |   |    |   |   |   |    |   |   |   |    |   |   |   |    |   |   |   |    |
| 1                                                                                                                                                                                                                                                                                           | 2                                                                                                                                                                                                                     | 3                                                                                                                                                                                                                                                                                                                                                                                                                                                                                                                                                                                                                                                     | 98                                                                                                                                                                                                                         |   |     |    |   |   |   |    |   |   |   |    |   |   |   |    |   |   |   |    |   |   |   |    |   |   |   |    |   |   |   |    |   |   |   |    |   |   |   |    |   |   |   |    |                                                                                                                                                                                                                                                                                                                                                                                                                                                                                                                                                                                                                                                       |   |   |     |    |   |   |   |    |   |   |   |    |   |   |   |    |   |   |   |    |   |   |   |    |   |   |   |    |   |   |   |    |   |   |   |    |   |   |   |    |   |   |   |    |
| 1                                                                                                                                                                                                                                                                                           | 2                                                                                                                                                                                                                     | 3                                                                                                                                                                                                                                                                                                                                                                                                                                                                                                                                                                                                                                                     | 98                                                                                                                                                                                                                         |   |     |    |   |   |   |    |   |   |   |    |   |   |   |    |   |   |   |    |   |   |   |    |   |   |   |    |   |   |   |    |   |   |   |    |   |   |   |    |   |   |   |    |                                                                                                                                                                                                                                                                                                                                                                                                                                                                                                                                                                                                                                                       |   |   |     |    |   |   |   |    |   |   |   |    |   |   |   |    |   |   |   |    |   |   |   |    |   |   |   |    |   |   |   |    |   |   |   |    |   |   |   |    |   |   |   |    |
| 1                                                                                                                                                                                                                                                                                           | 2                                                                                                                                                                                                                     | 3                                                                                                                                                                                                                                                                                                                                                                                                                                                                                                                                                                                                                                                     | 98                                                                                                                                                                                                                         |   |     |    |   |   |   |    |   |   |   |    |   |   |   |    |   |   |   |    |   |   |   |    |   |   |   |    |   |   |   |    |   |   |   |    |   |   |   |    |   |   |   |    |                                                                                                                                                                                                                                                                                                                                                                                                                                                                                                                                                                                                                                                       |   |   |     |    |   |   |   |    |   |   |   |    |   |   |   |    |   |   |   |    |   |   |   |    |   |   |   |    |   |   |   |    |   |   |   |    |   |   |   |    |   |   |   |    |
| 1                                                                                                                                                                                                                                                                                           | 2                                                                                                                                                                                                                     | 3                                                                                                                                                                                                                                                                                                                                                                                                                                                                                                                                                                                                                                                     | 98                                                                                                                                                                                                                         |   |     |    |   |   |   |    |   |   |   |    |   |   |   |    |   |   |   |    |   |   |   |    |   |   |   |    |   |   |   |    |   |   |   |    |   |   |   |    |   |   |   |    |                                                                                                                                                                                                                                                                                                                                                                                                                                                                                                                                                                                                                                                       |   |   |     |    |   |   |   |    |   |   |   |    |   |   |   |    |   |   |   |    |   |   |   |    |   |   |   |    |   |   |   |    |   |   |   |    |   |   |   |    |   |   |   |    |
| C                                                                                                                                                                                                                                                                                           | S                                                                                                                                                                                                                     | R/N                                                                                                                                                                                                                                                                                                                                                                                                                                                                                                                                                                                                                                                   | DK                                                                                                                                                                                                                         |   |     |    |   |   |   |    |   |   |   |    |   |   |   |    |   |   |   |    |   |   |   |    |   |   |   |    |   |   |   |    |   |   |   |    |   |   |   |    |   |   |   |    |                                                                                                                                                                                                                                                                                                                                                                                                                                                                                                                                                                                                                                                       |   |   |     |    |   |   |   |    |   |   |   |    |   |   |   |    |   |   |   |    |   |   |   |    |   |   |   |    |   |   |   |    |   |   |   |    |   |   |   |    |   |   |   |    |
| 1                                                                                                                                                                                                                                                                                           | 2                                                                                                                                                                                                                     | 3                                                                                                                                                                                                                                                                                                                                                                                                                                                                                                                                                                                                                                                     | 98                                                                                                                                                                                                                         |   |     |    |   |   |   |    |   |   |   |    |   |   |   |    |   |   |   |    |   |   |   |    |   |   |   |    |   |   |   |    |   |   |   |    |   |   |   |    |   |   |   |    |                                                                                                                                                                                                                                                                                                                                                                                                                                                                                                                                                                                                                                                       |   |   |     |    |   |   |   |    |   |   |   |    |   |   |   |    |   |   |   |    |   |   |   |    |   |   |   |    |   |   |   |    |   |   |   |    |   |   |   |    |   |   |   |    |
| 1                                                                                                                                                                                                                                                                                           | 2                                                                                                                                                                                                                     | 3                                                                                                                                                                                                                                                                                                                                                                                                                                                                                                                                                                                                                                                     | 98                                                                                                                                                                                                                         |   |     |    |   |   |   |    |   |   |   |    |   |   |   |    |   |   |   |    |   |   |   |    |   |   |   |    |   |   |   |    |   |   |   |    |   |   |   |    |   |   |   |    |                                                                                                                                                                                                                                                                                                                                                                                                                                                                                                                                                                                                                                                       |   |   |     |    |   |   |   |    |   |   |   |    |   |   |   |    |   |   |   |    |   |   |   |    |   |   |   |    |   |   |   |    |   |   |   |    |   |   |   |    |   |   |   |    |
| 1                                                                                                                                                                                                                                                                                           | 2                                                                                                                                                                                                                     | 3                                                                                                                                                                                                                                                                                                                                                                                                                                                                                                                                                                                                                                                     | 98                                                                                                                                                                                                                         |   |     |    |   |   |   |    |   |   |   |    |   |   |   |    |   |   |   |    |   |   |   |    |   |   |   |    |   |   |   |    |   |   |   |    |   |   |   |    |   |   |   |    |                                                                                                                                                                                                                                                                                                                                                                                                                                                                                                                                                                                                                                                       |   |   |     |    |   |   |   |    |   |   |   |    |   |   |   |    |   |   |   |    |   |   |   |    |   |   |   |    |   |   |   |    |   |   |   |    |   |   |   |    |   |   |   |    |
| 1                                                                                                                                                                                                                                                                                           | 2                                                                                                                                                                                                                     | 3                                                                                                                                                                                                                                                                                                                                                                                                                                                                                                                                                                                                                                                     | 98                                                                                                                                                                                                                         |   |     |    |   |   |   |    |   |   |   |    |   |   |   |    |   |   |   |    |   |   |   |    |   |   |   |    |   |   |   |    |   |   |   |    |   |   |   |    |   |   |   |    |                                                                                                                                                                                                                                                                                                                                                                                                                                                                                                                                                                                                                                                       |   |   |     |    |   |   |   |    |   |   |   |    |   |   |   |    |   |   |   |    |   |   |   |    |   |   |   |    |   |   |   |    |   |   |   |    |   |   |   |    |   |   |   |    |
| 1                                                                                                                                                                                                                                                                                           | 2                                                                                                                                                                                                                     | 3                                                                                                                                                                                                                                                                                                                                                                                                                                                                                                                                                                                                                                                     | 98                                                                                                                                                                                                                         |   |     |    |   |   |   |    |   |   |   |    |   |   |   |    |   |   |   |    |   |   |   |    |   |   |   |    |   |   |   |    |   |   |   |    |   |   |   |    |   |   |   |    |                                                                                                                                                                                                                                                                                                                                                                                                                                                                                                                                                                                                                                                       |   |   |     |    |   |   |   |    |   |   |   |    |   |   |   |    |   |   |   |    |   |   |   |    |   |   |   |    |   |   |   |    |   |   |   |    |   |   |   |    |   |   |   |    |
| 1                                                                                                                                                                                                                                                                                           | 2                                                                                                                                                                                                                     | 3                                                                                                                                                                                                                                                                                                                                                                                                                                                                                                                                                                                                                                                     | 98                                                                                                                                                                                                                         |   |     |    |   |   |   |    |   |   |   |    |   |   |   |    |   |   |   |    |   |   |   |    |   |   |   |    |   |   |   |    |   |   |   |    |   |   |   |    |   |   |   |    |                                                                                                                                                                                                                                                                                                                                                                                                                                                                                                                                                                                                                                                       |   |   |     |    |   |   |   |    |   |   |   |    |   |   |   |    |   |   |   |    |   |   |   |    |   |   |   |    |   |   |   |    |   |   |   |    |   |   |   |    |   |   |   |    |
| 1                                                                                                                                                                                                                                                                                           | 2                                                                                                                                                                                                                     | 3                                                                                                                                                                                                                                                                                                                                                                                                                                                                                                                                                                                                                                                     | 98                                                                                                                                                                                                                         |   |     |    |   |   |   |    |   |   |   |    |   |   |   |    |   |   |   |    |   |   |   |    |   |   |   |    |   |   |   |    |   |   |   |    |   |   |   |    |   |   |   |    |                                                                                                                                                                                                                                                                                                                                                                                                                                                                                                                                                                                                                                                       |   |   |     |    |   |   |   |    |   |   |   |    |   |   |   |    |   |   |   |    |   |   |   |    |   |   |   |    |   |   |   |    |   |   |   |    |   |   |   |    |   |   |   |    |
| 1                                                                                                                                                                                                                                                                                           | 2                                                                                                                                                                                                                     | 3                                                                                                                                                                                                                                                                                                                                                                                                                                                                                                                                                                                                                                                     | 98                                                                                                                                                                                                                         |   |     |    |   |   |   |    |   |   |   |    |   |   |   |    |   |   |   |    |   |   |   |    |   |   |   |    |   |   |   |    |   |   |   |    |   |   |   |    |   |   |   |    |                                                                                                                                                                                                                                                                                                                                                                                                                                                                                                                                                                                                                                                       |   |   |     |    |   |   |   |    |   |   |   |    |   |   |   |    |   |   |   |    |   |   |   |    |   |   |   |    |   |   |   |    |   |   |   |    |   |   |   |    |   |   |   |    |
| 1                                                                                                                                                                                                                                                                                           | 2                                                                                                                                                                                                                     | 3                                                                                                                                                                                                                                                                                                                                                                                                                                                                                                                                                                                                                                                     | 98                                                                                                                                                                                                                         |   |     |    |   |   |   |    |   |   |   |    |   |   |   |    |   |   |   |    |   |   |   |    |   |   |   |    |   |   |   |    |   |   |   |    |   |   |   |    |   |   |   |    |                                                                                                                                                                                                                                                                                                                                                                                                                                                                                                                                                                                                                                                       |   |   |     |    |   |   |   |    |   |   |   |    |   |   |   |    |   |   |   |    |   |   |   |    |   |   |   |    |   |   |   |    |   |   |   |    |   |   |   |    |   |   |   |    |
| 1                                                                                                                                                                                                                                                                                           | 2                                                                                                                                                                                                                     | 3                                                                                                                                                                                                                                                                                                                                                                                                                                                                                                                                                                                                                                                     | 98                                                                                                                                                                                                                         |   |     |    |   |   |   |    |   |   |   |    |   |   |   |    |   |   |   |    |   |   |   |    |   |   |   |    |   |   |   |    |   |   |   |    |   |   |   |    |   |   |   |    |                                                                                                                                                                                                                                                                                                                                                                                                                                                                                                                                                                                                                                                       |   |   |     |    |   |   |   |    |   |   |   |    |   |   |   |    |   |   |   |    |   |   |   |    |   |   |   |    |   |   |   |    |   |   |   |    |   |   |   |    |   |   |   |    |
| <p>a. Doctor</p> <p>b. Clinical officer</p> <p>c. Nurse</p> <p>d. Certified/Trained Midwife</p> <p>e. Pharmacist/Dispenser/drugstore/chemist</p> <p>f. TBA/traditional healer</p> <p>g. Woman - self-treated</p> <p>h. Other (<i>poor</i>): _____</p> <p>Other (<i>non-poor</i>): _____</p> |                                                                                                                                                                                                                       |                                                                                                                                                                                                                                                                                                                                                                                                                                                                                                                                                                                                                                                       |                                                                                                                                                                                                                            |   |     |    |   |   |   |    |   |   |   |    |   |   |   |    |   |   |   |    |   |   |   |    |   |   |   |    |   |   |   |    |   |   |   |    |   |   |   |    |   |   |   |    |                                                                                                                                                                                                                                                                                                                                                                                                                                                                                                                                                                                                                                                       |   |   |     |    |   |   |   |    |   |   |   |    |   |   |   |    |   |   |   |    |   |   |   |    |   |   |   |    |   |   |   |    |   |   |   |    |   |   |   |    |   |   |   |    |

Now I will ask you just a question about live births attended by a trained provider at a facility.

| 312            | <p>Of all urban women who deliver a live born child in this country, what percent would you say go to a public or private facility that is staffed with a trained provider to assist the delivery?</p> <p><b>And what would the percentage be for rural women in the whole country?</b></p> | <p><b>% Live births attended in HF</b></p> <table border="1"> <thead> <tr> <th>1. Urban Women</th> <th>2. Rural Women</th> </tr> </thead> <tbody> <tr> <td>_____</td> <td>_____</td> </tr> </tbody> </table> | 1. Urban Women | 2. Rural Women | _____ | _____ |
|----------------|---------------------------------------------------------------------------------------------------------------------------------------------------------------------------------------------------------------------------------------------------------------------------------------------|--------------------------------------------------------------------------------------------------------------------------------------------------------------------------------------------------------------|----------------|----------------|-------|-------|
| 1. Urban Women | 2. Rural Women                                                                                                                                                                                                                                                                              |                                                                                                                                                                                                              |                |                |       |       |
| _____          | _____                                                                                                                                                                                                                                                                                       |                                                                                                                                                                                                              |                |                |       |       |

| 313                                        | <p>For the following, please indicate whether it is never/rarely, sometimes, or always a barrier to the use of post abortion care services.</p> <p><b>[Interviewer: READ THE LIST and indicate in each case (A) Always, (S) Sometimes, (R) Rarely, or (N) Never</b></p> | <p><b>Barriers for use of PAC services</b></p> <table border="1"> <thead> <tr> <th></th> <th>A</th> <th>S</th> <th>R/N</th> <th>DK</th> </tr> </thead> <tbody> <tr><td>a. Cost to woman</td><td>1</td><td>2</td><td>3</td><td>98</td></tr> <tr><td>b. Distance/ transportation</td><td>1</td><td>2</td><td>3</td><td>98</td></tr> <tr><td>c. Inadequate training of providers</td><td>1</td><td>2</td><td>3</td><td>98</td></tr> <tr><td>d. Inadequate space/equipment at facility</td><td>1</td><td>2</td><td>3</td><td>98</td></tr> <tr><td>e. Under-staffing at facility</td><td>1</td><td>2</td><td>3</td><td>98</td></tr> <tr><td>f. Hostile/unfriendly provider attitudes</td><td>1</td><td>2</td><td>3</td><td>98</td></tr> <tr><td>g. Lack of patient information on services</td><td>1</td><td>2</td><td>3</td><td>98</td></tr> <tr><td>h. Husband/family objections</td><td>1</td><td>2</td><td>3</td><td>98</td></tr> <tr><td>i. Fear/stigma</td><td>1</td><td>2</td><td>3</td><td>98</td></tr> <tr><td>j. Delay in identifying danger signs</td><td>1</td><td>2</td><td>3</td><td>98</td></tr> <tr><td>k. Other (specify):</td><td>1</td><td>2</td><td>3</td><td>98</td></tr> </tbody> </table> |     | A  | S | R/N | DK | a. Cost to woman | 1 | 2 | 3 | 98 | b. Distance/ transportation | 1 | 2 | 3 | 98 | c. Inadequate training of providers | 1 | 2 | 3 | 98 | d. Inadequate space/equipment at facility | 1 | 2 | 3 | 98 | e. Under-staffing at facility | 1 | 2 | 3 | 98 | f. Hostile/unfriendly provider attitudes | 1 | 2 | 3 | 98 | g. Lack of patient information on services | 1 | 2 | 3 | 98 | h. Husband/family objections | 1 | 2 | 3 | 98 | i. Fear/stigma | 1 | 2 | 3 | 98 | j. Delay in identifying danger signs | 1 | 2 | 3 | 98 | k. Other (specify): | 1 | 2 | 3 | 98 |
|--------------------------------------------|-------------------------------------------------------------------------------------------------------------------------------------------------------------------------------------------------------------------------------------------------------------------------|-------------------------------------------------------------------------------------------------------------------------------------------------------------------------------------------------------------------------------------------------------------------------------------------------------------------------------------------------------------------------------------------------------------------------------------------------------------------------------------------------------------------------------------------------------------------------------------------------------------------------------------------------------------------------------------------------------------------------------------------------------------------------------------------------------------------------------------------------------------------------------------------------------------------------------------------------------------------------------------------------------------------------------------------------------------------------------------------------------------------------------------------------------------------------------------------------------------|-----|----|---|-----|----|------------------|---|---|---|----|-----------------------------|---|---|---|----|-------------------------------------|---|---|---|----|-------------------------------------------|---|---|---|----|-------------------------------|---|---|---|----|------------------------------------------|---|---|---|----|--------------------------------------------|---|---|---|----|------------------------------|---|---|---|----|----------------|---|---|---|----|--------------------------------------|---|---|---|----|---------------------|---|---|---|----|
|                                            | A                                                                                                                                                                                                                                                                       | S                                                                                                                                                                                                                                                                                                                                                                                                                                                                                                                                                                                                                                                                                                                                                                                                                                                                                                                                                                                                                                                                                                                                                                                                           | R/N | DK |   |     |    |                  |   |   |   |    |                             |   |   |   |    |                                     |   |   |   |    |                                           |   |   |   |    |                               |   |   |   |    |                                          |   |   |   |    |                                            |   |   |   |    |                              |   |   |   |    |                |   |   |   |    |                                      |   |   |   |    |                     |   |   |   |    |
| a. Cost to woman                           | 1                                                                                                                                                                                                                                                                       | 2                                                                                                                                                                                                                                                                                                                                                                                                                                                                                                                                                                                                                                                                                                                                                                                                                                                                                                                                                                                                                                                                                                                                                                                                           | 3   | 98 |   |     |    |                  |   |   |   |    |                             |   |   |   |    |                                     |   |   |   |    |                                           |   |   |   |    |                               |   |   |   |    |                                          |   |   |   |    |                                            |   |   |   |    |                              |   |   |   |    |                |   |   |   |    |                                      |   |   |   |    |                     |   |   |   |    |
| b. Distance/ transportation                | 1                                                                                                                                                                                                                                                                       | 2                                                                                                                                                                                                                                                                                                                                                                                                                                                                                                                                                                                                                                                                                                                                                                                                                                                                                                                                                                                                                                                                                                                                                                                                           | 3   | 98 |   |     |    |                  |   |   |   |    |                             |   |   |   |    |                                     |   |   |   |    |                                           |   |   |   |    |                               |   |   |   |    |                                          |   |   |   |    |                                            |   |   |   |    |                              |   |   |   |    |                |   |   |   |    |                                      |   |   |   |    |                     |   |   |   |    |
| c. Inadequate training of providers        | 1                                                                                                                                                                                                                                                                       | 2                                                                                                                                                                                                                                                                                                                                                                                                                                                                                                                                                                                                                                                                                                                                                                                                                                                                                                                                                                                                                                                                                                                                                                                                           | 3   | 98 |   |     |    |                  |   |   |   |    |                             |   |   |   |    |                                     |   |   |   |    |                                           |   |   |   |    |                               |   |   |   |    |                                          |   |   |   |    |                                            |   |   |   |    |                              |   |   |   |    |                |   |   |   |    |                                      |   |   |   |    |                     |   |   |   |    |
| d. Inadequate space/equipment at facility  | 1                                                                                                                                                                                                                                                                       | 2                                                                                                                                                                                                                                                                                                                                                                                                                                                                                                                                                                                                                                                                                                                                                                                                                                                                                                                                                                                                                                                                                                                                                                                                           | 3   | 98 |   |     |    |                  |   |   |   |    |                             |   |   |   |    |                                     |   |   |   |    |                                           |   |   |   |    |                               |   |   |   |    |                                          |   |   |   |    |                                            |   |   |   |    |                              |   |   |   |    |                |   |   |   |    |                                      |   |   |   |    |                     |   |   |   |    |
| e. Under-staffing at facility              | 1                                                                                                                                                                                                                                                                       | 2                                                                                                                                                                                                                                                                                                                                                                                                                                                                                                                                                                                                                                                                                                                                                                                                                                                                                                                                                                                                                                                                                                                                                                                                           | 3   | 98 |   |     |    |                  |   |   |   |    |                             |   |   |   |    |                                     |   |   |   |    |                                           |   |   |   |    |                               |   |   |   |    |                                          |   |   |   |    |                                            |   |   |   |    |                              |   |   |   |    |                |   |   |   |    |                                      |   |   |   |    |                     |   |   |   |    |
| f. Hostile/unfriendly provider attitudes   | 1                                                                                                                                                                                                                                                                       | 2                                                                                                                                                                                                                                                                                                                                                                                                                                                                                                                                                                                                                                                                                                                                                                                                                                                                                                                                                                                                                                                                                                                                                                                                           | 3   | 98 |   |     |    |                  |   |   |   |    |                             |   |   |   |    |                                     |   |   |   |    |                                           |   |   |   |    |                               |   |   |   |    |                                          |   |   |   |    |                                            |   |   |   |    |                              |   |   |   |    |                |   |   |   |    |                                      |   |   |   |    |                     |   |   |   |    |
| g. Lack of patient information on services | 1                                                                                                                                                                                                                                                                       | 2                                                                                                                                                                                                                                                                                                                                                                                                                                                                                                                                                                                                                                                                                                                                                                                                                                                                                                                                                                                                                                                                                                                                                                                                           | 3   | 98 |   |     |    |                  |   |   |   |    |                             |   |   |   |    |                                     |   |   |   |    |                                           |   |   |   |    |                               |   |   |   |    |                                          |   |   |   |    |                                            |   |   |   |    |                              |   |   |   |    |                |   |   |   |    |                                      |   |   |   |    |                     |   |   |   |    |
| h. Husband/family objections               | 1                                                                                                                                                                                                                                                                       | 2                                                                                                                                                                                                                                                                                                                                                                                                                                                                                                                                                                                                                                                                                                                                                                                                                                                                                                                                                                                                                                                                                                                                                                                                           | 3   | 98 |   |     |    |                  |   |   |   |    |                             |   |   |   |    |                                     |   |   |   |    |                                           |   |   |   |    |                               |   |   |   |    |                                          |   |   |   |    |                                            |   |   |   |    |                              |   |   |   |    |                |   |   |   |    |                                      |   |   |   |    |                     |   |   |   |    |
| i. Fear/stigma                             | 1                                                                                                                                                                                                                                                                       | 2                                                                                                                                                                                                                                                                                                                                                                                                                                                                                                                                                                                                                                                                                                                                                                                                                                                                                                                                                                                                                                                                                                                                                                                                           | 3   | 98 |   |     |    |                  |   |   |   |    |                             |   |   |   |    |                                     |   |   |   |    |                                           |   |   |   |    |                               |   |   |   |    |                                          |   |   |   |    |                                            |   |   |   |    |                              |   |   |   |    |                |   |   |   |    |                                      |   |   |   |    |                     |   |   |   |    |
| j. Delay in identifying danger signs       | 1                                                                                                                                                                                                                                                                       | 2                                                                                                                                                                                                                                                                                                                                                                                                                                                                                                                                                                                                                                                                                                                                                                                                                                                                                                                                                                                                                                                                                                                                                                                                           | 3   | 98 |   |     |    |                  |   |   |   |    |                             |   |   |   |    |                                     |   |   |   |    |                                           |   |   |   |    |                               |   |   |   |    |                                          |   |   |   |    |                                            |   |   |   |    |                              |   |   |   |    |                |   |   |   |    |                                      |   |   |   |    |                     |   |   |   |    |
| k. Other (specify):                        | 1                                                                                                                                                                                                                                                                       | 2                                                                                                                                                                                                                                                                                                                                                                                                                                                                                                                                                                                                                                                                                                                                                                                                                                                                                                                                                                                                                                                                                                                                                                                                           | 3   | 98 |   |     |    |                  |   |   |   |    |                             |   |   |   |    |                                     |   |   |   |    |                                           |   |   |   |    |                               |   |   |   |    |                                          |   |   |   |    |                                            |   |   |   |    |                              |   |   |   |    |                |   |   |   |    |                                      |   |   |   |    |                     |   |   |   |    |

## Module IV: Use of misoprostol

*Misoprostol (or Cytotec) is increasingly becoming available in Uganda and there is the possibility that it is also being used for a number of purposes. I would like to ask your views about use of misoprostol for induced abortion in Uganda.*

|     |                                                                                                                                                                                                                                                                                         |                 |                                         |                          |                       |
|-----|-----------------------------------------------------------------------------------------------------------------------------------------------------------------------------------------------------------------------------------------------------------------------------------------|-----------------|-----------------------------------------|--------------------------|-----------------------|
| 401 | As far as you are aware, is misoprostol currently being used in Uganda to induce abortion?                                                                                                                                                                                              | 1               | Yes                                     |                          |                       |
|     |                                                                                                                                                                                                                                                                                         | 2               | No → <b>SKIP TO SECTION 5</b>           |                          |                       |
|     |                                                                                                                                                                                                                                                                                         | 98              | Don't know → <b>SKIP TO SECTION 5</b>   |                          |                       |
| 402 | For how long has misoprostol been used in Uganda to induce abortion?<br><b>[Interviewer: If less than one year, write "0"]</b>                                                                                                                                                          |                 |                                         |                          | years ago             |
|     |                                                                                                                                                                                                                                                                                         | 98              | Don't know                              |                          |                       |
| 403 | As far as you are aware, where do you think misoprostol is most commonly used: in urban areas, rural areas or equally both?                                                                                                                                                             | 1               | More in urban areas                     |                          |                       |
|     |                                                                                                                                                                                                                                                                                         | 2               | More in rural areas                     |                          |                       |
|     |                                                                                                                                                                                                                                                                                         | 3               | Equally in both areas                   |                          |                       |
|     |                                                                                                                                                                                                                                                                                         | 98              | Don't know                              |                          |                       |
| 404 | As far as you are aware, where do you think misoprostol is provided or sold?<br><b>[Interviewer: Do not read list. Multiple responses allowed. Please circle all that apply.]</b>                                                                                                       | 1               | Doctors' private practice               |                          |                       |
|     |                                                                                                                                                                                                                                                                                         | 1               | Clinical Officers' private practice     |                          |                       |
|     |                                                                                                                                                                                                                                                                                         | 1               | Nurses'/midwives' private practice      |                          |                       |
|     |                                                                                                                                                                                                                                                                                         | 1               | Traditional birth attendants/Herbalists |                          |                       |
|     |                                                                                                                                                                                                                                                                                         | 1               | Pharmacies                              |                          |                       |
|     |                                                                                                                                                                                                                                                                                         | 1               | Chemist/Drug vending stores             |                          |                       |
|     |                                                                                                                                                                                                                                                                                         | 1               | Hospitals/Health facility               |                          |                       |
|     |                                                                                                                                                                                                                                                                                         | 96              | Other (specify): _____                  |                          |                       |
|     |                                                                                                                                                                                                                                                                                         | 98              | Don't know                              |                          |                       |
| 405 | Regardless of urban or rural area, how frequently do you think misoprostol is used or "provided" to terminate a pregnancy by the following people: commonly, sometimes, rarely or never?<br><b>[Interviewer: Read each person listed below and circle the the appropriate response]</b> |                 |                                         |                          |                       |
|     | <b>Type of Provider</b>                                                                                                                                                                                                                                                                 | <b>Commonly</b> | <b>Sometimes</b>                        | <b>Rarely/<br/>Never</b> | <b>Don't<br/>Know</b> |
|     | a. Medical doctor                                                                                                                                                                                                                                                                       | 1               | 2                                       | 3                        | 98                    |
|     | b. Clinical Officer                                                                                                                                                                                                                                                                     | 1               | 2                                       | 3                        | 98                    |
|     | c. Nurse/midwife                                                                                                                                                                                                                                                                        | 1               | 2                                       | 3                        | 98                    |
|     | d. Traditional birth attendant                                                                                                                                                                                                                                                          | 1               | 2                                       | 3                        | 98                    |
|     | e. Pharmacist                                                                                                                                                                                                                                                                           | 1               | 2                                       | 3                        | 98                    |
|     | f. Chemist/drug vendor                                                                                                                                                                                                                                                                  | 1               | 2                                       | 3                        | 98                    |
|     | g. Woman (self-induced)                                                                                                                                                                                                                                                                 | 1               | 2                                       | 3                        | 98                    |
|     | h. Partner/Spouse                                                                                                                                                                                                                                                                       | 1               | 2                                       | 3                        | 98                    |
|     | i. Friends/family member                                                                                                                                                                                                                                                                | 1               | 2                                       | 3                        | 98                    |
|     | j. Other (specify): _____                                                                                                                                                                                                                                                               | 1               | 2                                       | 3                        | 98                    |

**[Interviewer: Check Q405 and for each category of provider mentioned as commonly or sometimes use misoprostol, ask Q406.]**

406 How much do you think a woman in Uganda pays for an abortion performed using misoprostol from each of the following sources?

| Type of Provider               | Amount in Shillings | Don't Know |
|--------------------------------|---------------------|------------|
| a. Medical doctor              |                     | 98         |
| b. Clinical Officer            |                     | 98         |
| c. Nurse/midwife               |                     | 98         |
| d. Traditional birth attendant |                     | 98         |
| e. Pharmacist                  |                     | 98         |
| f. Chemist/drug vendor         |                     | 98         |
| g. Other (specify): _____      |                     | 98         |

407 As you know, each medication should be administered in the adequate dose to be effective and safe. How often do you think the following people who provide misoprostol for the purposes of pregnancy termination, generally know the correct dose: commonly, sometimes, rarely or never?

**[Interviewer: Read each provider/person and circle the appropriate response.]**

| Type of Provider               | Commonly | Sometimes | Rarely/<br>Never | Don't Know |
|--------------------------------|----------|-----------|------------------|------------|
| a. Medical doctor              | 1        | 2         | 3                | 98         |
| b. Clinical Officer            | 1        | 2         | 3                | 98         |
| c. Nurse/midwife               | 1        | 2         | 3                | 98         |
| d. Traditional birth attendant | 1        | 2         | 3                | 98         |
| e. Pharmacist                  | 1        | 2         | 3                | 98         |
| f. Chemist/drug vendor         | 1        | 2         | 3                | 98         |
| g. Woman (self-induced)        | 1        | 2         | 3                | 98         |
| h. Partner/Spouse              | 1        | 2         | 3                | 98         |
| i. Friends/family member       | 1        | 2         | 3                | 98         |
| j. Other (specify): _____      | 1        | 2         | 3                | 98         |

408 Out of ten **women** who have an abortion by the use of misoprostol, how many do you think would experience a medical complication that should receive medical treatment in a health facility?

**[Interviewer: Please refer to definition of complications in the beginning of Section 3]**

|  |  |                                          |
|--|--|------------------------------------------|
|  |  | Women out of 10 experience complications |
|--|--|------------------------------------------|

409 Out of 10 **women** who experience a medical complication from an abortion performed by the use of misoprostol, how many do you think actually get treated by a trained person in a health facility?

|  |  |                                              |
|--|--|----------------------------------------------|
|  |  | Women out of 10 treated in a health facility |
|--|--|----------------------------------------------|

## Module V: Postabortion Counselling

|     |                                                                                                                                                                                                                                                                                                                                                                         |                                                                                                                                                                                                                                                                                                                                                                                                                                                                                                                                                                                                                                                                                                                                                                                                                                   |   |       |   |             |   |           |   |     |   |             |   |               |   |           |   |                                       |   |                                |   |            |   |                                 |   |             |   |                         |   |            |   |           |    |                                       |    |                        |
|-----|-------------------------------------------------------------------------------------------------------------------------------------------------------------------------------------------------------------------------------------------------------------------------------------------------------------------------------------------------------------------------|-----------------------------------------------------------------------------------------------------------------------------------------------------------------------------------------------------------------------------------------------------------------------------------------------------------------------------------------------------------------------------------------------------------------------------------------------------------------------------------------------------------------------------------------------------------------------------------------------------------------------------------------------------------------------------------------------------------------------------------------------------------------------------------------------------------------------------------|---|-------|---|-------------|---|-----------|---|-----|---|-------------|---|---------------|---|-----------|---|---------------------------------------|---|--------------------------------|---|------------|---|---------------------------------|---|-------------|---|-------------------------|---|------------|---|-----------|----|---------------------------------------|----|------------------------|
| 501 | <p>As you know, some women become pregnant while they are using contraceptive methods.</p> <p>In your opinion, which methods were women with unintended pregnancies using at the time of conception?</p> <p><b>[Interviewer: DO NOT PROMPT. Multiple responses are allowed.]</b></p> <p><b>Probe for other methods.</b><br/>(Are there other methods? What else...)</p> | <table border="1"> <tr><td>1</td><td>Pills</td></tr> <tr><td>1</td><td>Injectables</td></tr> <tr><td>1</td><td>Implants</td></tr> <tr><td>1</td><td>IUD</td></tr> <tr><td>1</td><td>Male condom</td></tr> <tr><td>1</td><td>Female condom</td></tr> <tr><td>1</td><td>Diaphragm</td></tr> <tr><td>1</td><td>Tubal ligation (Female sterilization)</td></tr> <tr><td>1</td><td>Vasectomy (Male sterilization)</td></tr> <tr><td>1</td><td>Withdrawal</td></tr> <tr><td>1</td><td>Rhythm method (e.g. Moon beads)</td></tr> <tr><td>1</td><td>Spermicides</td></tr> <tr><td>1</td><td>Emergency contraception</td></tr> <tr><td>1</td><td>Abstinence</td></tr> <tr><td>1</td><td>No method</td></tr> <tr><td>1</td><td>Lactational amenorrhea/Breast feeding</td></tr> <tr><td>96</td><td>Other (specify): _____</td></tr> </table> | 1 | Pills | 1 | Injectables | 1 | Implants  | 1 | IUD | 1 | Male condom | 1 | Female condom | 1 | Diaphragm | 1 | Tubal ligation (Female sterilization) | 1 | Vasectomy (Male sterilization) | 1 | Withdrawal | 1 | Rhythm method (e.g. Moon beads) | 1 | Spermicides | 1 | Emergency contraception | 1 | Abstinence | 1 | No method | 1  | Lactational amenorrhea/Breast feeding | 96 | Other (specify): _____ |
| 1   | Pills                                                                                                                                                                                                                                                                                                                                                                   |                                                                                                                                                                                                                                                                                                                                                                                                                                                                                                                                                                                                                                                                                                                                                                                                                                   |   |       |   |             |   |           |   |     |   |             |   |               |   |           |   |                                       |   |                                |   |            |   |                                 |   |             |   |                         |   |            |   |           |    |                                       |    |                        |
| 1   | Injectables                                                                                                                                                                                                                                                                                                                                                             |                                                                                                                                                                                                                                                                                                                                                                                                                                                                                                                                                                                                                                                                                                                                                                                                                                   |   |       |   |             |   |           |   |     |   |             |   |               |   |           |   |                                       |   |                                |   |            |   |                                 |   |             |   |                         |   |            |   |           |    |                                       |    |                        |
| 1   | Implants                                                                                                                                                                                                                                                                                                                                                                |                                                                                                                                                                                                                                                                                                                                                                                                                                                                                                                                                                                                                                                                                                                                                                                                                                   |   |       |   |             |   |           |   |     |   |             |   |               |   |           |   |                                       |   |                                |   |            |   |                                 |   |             |   |                         |   |            |   |           |    |                                       |    |                        |
| 1   | IUD                                                                                                                                                                                                                                                                                                                                                                     |                                                                                                                                                                                                                                                                                                                                                                                                                                                                                                                                                                                                                                                                                                                                                                                                                                   |   |       |   |             |   |           |   |     |   |             |   |               |   |           |   |                                       |   |                                |   |            |   |                                 |   |             |   |                         |   |            |   |           |    |                                       |    |                        |
| 1   | Male condom                                                                                                                                                                                                                                                                                                                                                             |                                                                                                                                                                                                                                                                                                                                                                                                                                                                                                                                                                                                                                                                                                                                                                                                                                   |   |       |   |             |   |           |   |     |   |             |   |               |   |           |   |                                       |   |                                |   |            |   |                                 |   |             |   |                         |   |            |   |           |    |                                       |    |                        |
| 1   | Female condom                                                                                                                                                                                                                                                                                                                                                           |                                                                                                                                                                                                                                                                                                                                                                                                                                                                                                                                                                                                                                                                                                                                                                                                                                   |   |       |   |             |   |           |   |     |   |             |   |               |   |           |   |                                       |   |                                |   |            |   |                                 |   |             |   |                         |   |            |   |           |    |                                       |    |                        |
| 1   | Diaphragm                                                                                                                                                                                                                                                                                                                                                               |                                                                                                                                                                                                                                                                                                                                                                                                                                                                                                                                                                                                                                                                                                                                                                                                                                   |   |       |   |             |   |           |   |     |   |             |   |               |   |           |   |                                       |   |                                |   |            |   |                                 |   |             |   |                         |   |            |   |           |    |                                       |    |                        |
| 1   | Tubal ligation (Female sterilization)                                                                                                                                                                                                                                                                                                                                   |                                                                                                                                                                                                                                                                                                                                                                                                                                                                                                                                                                                                                                                                                                                                                                                                                                   |   |       |   |             |   |           |   |     |   |             |   |               |   |           |   |                                       |   |                                |   |            |   |                                 |   |             |   |                         |   |            |   |           |    |                                       |    |                        |
| 1   | Vasectomy (Male sterilization)                                                                                                                                                                                                                                                                                                                                          |                                                                                                                                                                                                                                                                                                                                                                                                                                                                                                                                                                                                                                                                                                                                                                                                                                   |   |       |   |             |   |           |   |     |   |             |   |               |   |           |   |                                       |   |                                |   |            |   |                                 |   |             |   |                         |   |            |   |           |    |                                       |    |                        |
| 1   | Withdrawal                                                                                                                                                                                                                                                                                                                                                              |                                                                                                                                                                                                                                                                                                                                                                                                                                                                                                                                                                                                                                                                                                                                                                                                                                   |   |       |   |             |   |           |   |     |   |             |   |               |   |           |   |                                       |   |                                |   |            |   |                                 |   |             |   |                         |   |            |   |           |    |                                       |    |                        |
| 1   | Rhythm method (e.g. Moon beads)                                                                                                                                                                                                                                                                                                                                         |                                                                                                                                                                                                                                                                                                                                                                                                                                                                                                                                                                                                                                                                                                                                                                                                                                   |   |       |   |             |   |           |   |     |   |             |   |               |   |           |   |                                       |   |                                |   |            |   |                                 |   |             |   |                         |   |            |   |           |    |                                       |    |                        |
| 1   | Spermicides                                                                                                                                                                                                                                                                                                                                                             |                                                                                                                                                                                                                                                                                                                                                                                                                                                                                                                                                                                                                                                                                                                                                                                                                                   |   |       |   |             |   |           |   |     |   |             |   |               |   |           |   |                                       |   |                                |   |            |   |                                 |   |             |   |                         |   |            |   |           |    |                                       |    |                        |
| 1   | Emergency contraception                                                                                                                                                                                                                                                                                                                                                 |                                                                                                                                                                                                                                                                                                                                                                                                                                                                                                                                                                                                                                                                                                                                                                                                                                   |   |       |   |             |   |           |   |     |   |             |   |               |   |           |   |                                       |   |                                |   |            |   |                                 |   |             |   |                         |   |            |   |           |    |                                       |    |                        |
| 1   | Abstinence                                                                                                                                                                                                                                                                                                                                                              |                                                                                                                                                                                                                                                                                                                                                                                                                                                                                                                                                                                                                                                                                                                                                                                                                                   |   |       |   |             |   |           |   |     |   |             |   |               |   |           |   |                                       |   |                                |   |            |   |                                 |   |             |   |                         |   |            |   |           |    |                                       |    |                        |
| 1   | No method                                                                                                                                                                                                                                                                                                                                                               |                                                                                                                                                                                                                                                                                                                                                                                                                                                                                                                                                                                                                                                                                                                                                                                                                                   |   |       |   |             |   |           |   |     |   |             |   |               |   |           |   |                                       |   |                                |   |            |   |                                 |   |             |   |                         |   |            |   |           |    |                                       |    |                        |
| 1   | Lactational amenorrhea/Breast feeding                                                                                                                                                                                                                                                                                                                                   |                                                                                                                                                                                                                                                                                                                                                                                                                                                                                                                                                                                                                                                                                                                                                                                                                                   |   |       |   |             |   |           |   |     |   |             |   |               |   |           |   |                                       |   |                                |   |            |   |                                 |   |             |   |                         |   |            |   |           |    |                                       |    |                        |
| 96  | Other (specify): _____                                                                                                                                                                                                                                                                                                                                                  |                                                                                                                                                                                                                                                                                                                                                                                                                                                                                                                                                                                                                                                                                                                                                                                                                                   |   |       |   |             |   |           |   |     |   |             |   |               |   |           |   |                                       |   |                                |   |            |   |                                 |   |             |   |                         |   |            |   |           |    |                                       |    |                        |
| 502 | <p>Do you think providers of PAC services offer contraceptive counselling to all, some, or none of their patients?</p>                                                                                                                                                                                                                                                  | <table border="1"> <tr><td>1</td><td>All</td></tr> <tr><td>2</td><td>Some</td></tr> <tr><td>3</td><td>None</td></tr> </table> <div style="margin-left: 150px;"> <input type="checkbox"/> 98 Don't know         </div>                                                                                                                                                                                                                                                                                                                                                                                                                                                                                                                                                                                                             | 1 | All   | 2 | Some        | 3 | None      |   |     |   |             |   |               |   |           |   |                                       |   |                                |   |            |   |                                 |   |             |   |                         |   |            |   |           |    |                                       |    |                        |
| 1   | All                                                                                                                                                                                                                                                                                                                                                                     |                                                                                                                                                                                                                                                                                                                                                                                                                                                                                                                                                                                                                                                                                                                                                                                                                                   |   |       |   |             |   |           |   |     |   |             |   |               |   |           |   |                                       |   |                                |   |            |   |                                 |   |             |   |                         |   |            |   |           |    |                                       |    |                        |
| 2   | Some                                                                                                                                                                                                                                                                                                                                                                    |                                                                                                                                                                                                                                                                                                                                                                                                                                                                                                                                                                                                                                                                                                                                                                                                                                   |   |       |   |             |   |           |   |     |   |             |   |               |   |           |   |                                       |   |                                |   |            |   |                                 |   |             |   |                         |   |            |   |           |    |                                       |    |                        |
| 3   | None                                                                                                                                                                                                                                                                                                                                                                    |                                                                                                                                                                                                                                                                                                                                                                                                                                                                                                                                                                                                                                                                                                                                                                                                                                   |   |       |   |             |   |           |   |     |   |             |   |               |   |           |   |                                       |   |                                |   |            |   |                                 |   |             |   |                         |   |            |   |           |    |                                       |    |                        |
| 503 | <p>Do you think that all abortion patients should be offered postabortion contraceptive counselling while they are still at the health facility?</p>                                                                                                                                                                                                                    | <table border="1"> <tr><td>1</td><td>Yes</td></tr> <tr><td>2</td><td>No</td></tr> </table>                                                                                                                                                                                                                                                                                                                                                                                                                                                                                                                                                                                                                                                                                                                                        | 1 | Yes   | 2 | No          |   |           |   |     |   |             |   |               |   |           |   |                                       |   |                                |   |            |   |                                 |   |             |   |                         |   |            |   |           |    |                                       |    |                        |
| 1   | Yes                                                                                                                                                                                                                                                                                                                                                                     |                                                                                                                                                                                                                                                                                                                                                                                                                                                                                                                                                                                                                                                                                                                                                                                                                                   |   |       |   |             |   |           |   |     |   |             |   |               |   |           |   |                                       |   |                                |   |            |   |                                 |   |             |   |                         |   |            |   |           |    |                                       |    |                        |
| 2   | No                                                                                                                                                                                                                                                                                                                                                                      |                                                                                                                                                                                                                                                                                                                                                                                                                                                                                                                                                                                                                                                                                                                                                                                                                                   |   |       |   |             |   |           |   |     |   |             |   |               |   |           |   |                                       |   |                                |   |            |   |                                 |   |             |   |                         |   |            |   |           |    |                                       |    |                        |
| 504 | <p>Do you think that all abortion patients should be offered a contraceptive method while they are still at the health facility?</p>                                                                                                                                                                                                                                    | <table border="1"> <tr><td>1</td><td>Yes</td></tr> <tr><td>2</td><td>No</td></tr> <tr><td>3</td><td>Sometimes</td></tr> </table>                                                                                                                                                                                                                                                                                                                                                                                                                                                                                                                                                                                                                                                                                                  | 1 | Yes   | 2 | No          | 3 | Sometimes |   |     |   |             |   |               |   |           |   |                                       |   |                                |   |            |   |                                 |   |             |   |                         |   |            |   |           |    |                                       |    |                        |
| 1   | Yes                                                                                                                                                                                                                                                                                                                                                                     |                                                                                                                                                                                                                                                                                                                                                                                                                                                                                                                                                                                                                                                                                                                                                                                                                                   |   |       |   |             |   |           |   |     |   |             |   |               |   |           |   |                                       |   |                                |   |            |   |                                 |   |             |   |                         |   |            |   |           |    |                                       |    |                        |
| 2   | No                                                                                                                                                                                                                                                                                                                                                                      |                                                                                                                                                                                                                                                                                                                                                                                                                                                                                                                                                                                                                                                                                                                                                                                                                                   |   |       |   |             |   |           |   |     |   |             |   |               |   |           |   |                                       |   |                                |   |            |   |                                 |   |             |   |                         |   |            |   |           |    |                                       |    |                        |
| 3   | Sometimes                                                                                                                                                                                                                                                                                                                                                               |                                                                                                                                                                                                                                                                                                                                                                                                                                                                                                                                                                                                                                                                                                                                                                                                                                   |   |       |   |             |   |           |   |     |   |             |   |               |   |           |   |                                       |   |                                |   |            |   |                                 |   |             |   |                         |   |            |   |           |    |                                       |    |                        |
| 505 | <p>In your opinion, which methods are most appropriate for post abortion care patients?</p> <p><b>[Interviewer: DO NOT PROMPT. Multiple responses are allowed.]</b></p> <p><b>Probe for other methods.</b><br/>(Are there other methods? What else...)</p>                                                                                                              | <table border="1"> <tr><td>1</td><td>Pills</td></tr> <tr><td>1</td><td>Injectables</td></tr> <tr><td>1</td><td>Implants</td></tr> <tr><td>1</td><td>IUD</td></tr> <tr><td>1</td><td>Male condom</td></tr> <tr><td>1</td><td>Female condom</td></tr> <tr><td>1</td><td>Diaphragm</td></tr> <tr><td>1</td><td>Tubal ligation (Female sterilization)</td></tr> <tr><td>1</td><td>Vasectomy (Male sterilization)</td></tr> <tr><td>1</td><td>Withdrawal</td></tr> <tr><td>1</td><td>Rhythm method (e.g. Moon beads)</td></tr> <tr><td>1</td><td>Spermicides</td></tr> <tr><td>1</td><td>Emergency contraception</td></tr> <tr><td>1</td><td>Abstinence</td></tr> <tr><td>1</td><td>No method</td></tr> <tr><td>96</td><td>Other (specify): _____</td></tr> </table>                                                                   | 1 | Pills | 1 | Injectables | 1 | Implants  | 1 | IUD | 1 | Male condom | 1 | Female condom | 1 | Diaphragm | 1 | Tubal ligation (Female sterilization) | 1 | Vasectomy (Male sterilization) | 1 | Withdrawal | 1 | Rhythm method (e.g. Moon beads) | 1 | Spermicides | 1 | Emergency contraception | 1 | Abstinence | 1 | No method | 96 | Other (specify): _____                |    |                        |
| 1   | Pills                                                                                                                                                                                                                                                                                                                                                                   |                                                                                                                                                                                                                                                                                                                                                                                                                                                                                                                                                                                                                                                                                                                                                                                                                                   |   |       |   |             |   |           |   |     |   |             |   |               |   |           |   |                                       |   |                                |   |            |   |                                 |   |             |   |                         |   |            |   |           |    |                                       |    |                        |
| 1   | Injectables                                                                                                                                                                                                                                                                                                                                                             |                                                                                                                                                                                                                                                                                                                                                                                                                                                                                                                                                                                                                                                                                                                                                                                                                                   |   |       |   |             |   |           |   |     |   |             |   |               |   |           |   |                                       |   |                                |   |            |   |                                 |   |             |   |                         |   |            |   |           |    |                                       |    |                        |
| 1   | Implants                                                                                                                                                                                                                                                                                                                                                                |                                                                                                                                                                                                                                                                                                                                                                                                                                                                                                                                                                                                                                                                                                                                                                                                                                   |   |       |   |             |   |           |   |     |   |             |   |               |   |           |   |                                       |   |                                |   |            |   |                                 |   |             |   |                         |   |            |   |           |    |                                       |    |                        |
| 1   | IUD                                                                                                                                                                                                                                                                                                                                                                     |                                                                                                                                                                                                                                                                                                                                                                                                                                                                                                                                                                                                                                                                                                                                                                                                                                   |   |       |   |             |   |           |   |     |   |             |   |               |   |           |   |                                       |   |                                |   |            |   |                                 |   |             |   |                         |   |            |   |           |    |                                       |    |                        |
| 1   | Male condom                                                                                                                                                                                                                                                                                                                                                             |                                                                                                                                                                                                                                                                                                                                                                                                                                                                                                                                                                                                                                                                                                                                                                                                                                   |   |       |   |             |   |           |   |     |   |             |   |               |   |           |   |                                       |   |                                |   |            |   |                                 |   |             |   |                         |   |            |   |           |    |                                       |    |                        |
| 1   | Female condom                                                                                                                                                                                                                                                                                                                                                           |                                                                                                                                                                                                                                                                                                                                                                                                                                                                                                                                                                                                                                                                                                                                                                                                                                   |   |       |   |             |   |           |   |     |   |             |   |               |   |           |   |                                       |   |                                |   |            |   |                                 |   |             |   |                         |   |            |   |           |    |                                       |    |                        |
| 1   | Diaphragm                                                                                                                                                                                                                                                                                                                                                               |                                                                                                                                                                                                                                                                                                                                                                                                                                                                                                                                                                                                                                                                                                                                                                                                                                   |   |       |   |             |   |           |   |     |   |             |   |               |   |           |   |                                       |   |                                |   |            |   |                                 |   |             |   |                         |   |            |   |           |    |                                       |    |                        |
| 1   | Tubal ligation (Female sterilization)                                                                                                                                                                                                                                                                                                                                   |                                                                                                                                                                                                                                                                                                                                                                                                                                                                                                                                                                                                                                                                                                                                                                                                                                   |   |       |   |             |   |           |   |     |   |             |   |               |   |           |   |                                       |   |                                |   |            |   |                                 |   |             |   |                         |   |            |   |           |    |                                       |    |                        |
| 1   | Vasectomy (Male sterilization)                                                                                                                                                                                                                                                                                                                                          |                                                                                                                                                                                                                                                                                                                                                                                                                                                                                                                                                                                                                                                                                                                                                                                                                                   |   |       |   |             |   |           |   |     |   |             |   |               |   |           |   |                                       |   |                                |   |            |   |                                 |   |             |   |                         |   |            |   |           |    |                                       |    |                        |
| 1   | Withdrawal                                                                                                                                                                                                                                                                                                                                                              |                                                                                                                                                                                                                                                                                                                                                                                                                                                                                                                                                                                                                                                                                                                                                                                                                                   |   |       |   |             |   |           |   |     |   |             |   |               |   |           |   |                                       |   |                                |   |            |   |                                 |   |             |   |                         |   |            |   |           |    |                                       |    |                        |
| 1   | Rhythm method (e.g. Moon beads)                                                                                                                                                                                                                                                                                                                                         |                                                                                                                                                                                                                                                                                                                                                                                                                                                                                                                                                                                                                                                                                                                                                                                                                                   |   |       |   |             |   |           |   |     |   |             |   |               |   |           |   |                                       |   |                                |   |            |   |                                 |   |             |   |                         |   |            |   |           |    |                                       |    |                        |
| 1   | Spermicides                                                                                                                                                                                                                                                                                                                                                             |                                                                                                                                                                                                                                                                                                                                                                                                                                                                                                                                                                                                                                                                                                                                                                                                                                   |   |       |   |             |   |           |   |     |   |             |   |               |   |           |   |                                       |   |                                |   |            |   |                                 |   |             |   |                         |   |            |   |           |    |                                       |    |                        |
| 1   | Emergency contraception                                                                                                                                                                                                                                                                                                                                                 |                                                                                                                                                                                                                                                                                                                                                                                                                                                                                                                                                                                                                                                                                                                                                                                                                                   |   |       |   |             |   |           |   |     |   |             |   |               |   |           |   |                                       |   |                                |   |            |   |                                 |   |             |   |                         |   |            |   |           |    |                                       |    |                        |
| 1   | Abstinence                                                                                                                                                                                                                                                                                                                                                              |                                                                                                                                                                                                                                                                                                                                                                                                                                                                                                                                                                                                                                                                                                                                                                                                                                   |   |       |   |             |   |           |   |     |   |             |   |               |   |           |   |                                       |   |                                |   |            |   |                                 |   |             |   |                         |   |            |   |           |    |                                       |    |                        |
| 1   | No method                                                                                                                                                                                                                                                                                                                                                               |                                                                                                                                                                                                                                                                                                                                                                                                                                                                                                                                                                                                                                                                                                                                                                                                                                   |   |       |   |             |   |           |   |     |   |             |   |               |   |           |   |                                       |   |                                |   |            |   |                                 |   |             |   |                         |   |            |   |           |    |                                       |    |                        |
| 96  | Other (specify): _____                                                                                                                                                                                                                                                                                                                                                  |                                                                                                                                                                                                                                                                                                                                                                                                                                                                                                                                                                                                                                                                                                                                                                                                                                   |   |       |   |             |   |           |   |     |   |             |   |               |   |           |   |                                       |   |                                |   |            |   |                                 |   |             |   |                         |   |            |   |           |    |                                       |    |                        |

## Module VI: Opinions

|     |                                                                                                                                                                                                                                                                         |                                                                                                                                                                                                                                                                                                                                                                                                                                                                                                                 |                   |                   |            |                 |   |                         |  |  |  |  |  |  |  |
|-----|-------------------------------------------------------------------------------------------------------------------------------------------------------------------------------------------------------------------------------------------------------------------------|-----------------------------------------------------------------------------------------------------------------------------------------------------------------------------------------------------------------------------------------------------------------------------------------------------------------------------------------------------------------------------------------------------------------------------------------------------------------------------------------------------------------|-------------------|-------------------|------------|-----------------|---|-------------------------|--|--|--|--|--|--|--|
| 601 | Comparing the problem of medical complications due to unsafe abortion with other health problems of pregnant women in Uganda, would you say that unsafe abortion is:<br><br><b>[Interviewer: Read list and circle one response.]</b>                                    | <table border="1" style="width: 100%; border-collapse: collapse;"> <tr> <td style="width: 20px; text-align: center;">1</td> <td>A serious problem</td> </tr> <tr> <td style="text-align: center;">2</td> <td>A minor problem</td> </tr> <tr> <td style="text-align: center;">3</td> <td>Not a problem</td> </tr> </table>                                                                                                                                                                                       | 1                 | A serious problem | 2          | A minor problem | 3 | Not a problem           |  |  |  |  |  |  |  |
| 1   | A serious problem                                                                                                                                                                                                                                                       |                                                                                                                                                                                                                                                                                                                                                                                                                                                                                                                 |                   |                   |            |                 |   |                         |  |  |  |  |  |  |  |
| 2   | A minor problem                                                                                                                                                                                                                                                         |                                                                                                                                                                                                                                                                                                                                                                                                                                                                                                                 |                   |                   |            |                 |   |                         |  |  |  |  |  |  |  |
| 3   | Not a problem                                                                                                                                                                                                                                                           |                                                                                                                                                                                                                                                                                                                                                                                                                                                                                                                 |                   |                   |            |                 |   |                         |  |  |  |  |  |  |  |
| 602 | I am going to read some of the most common reasons women in Uganda seek to have an induced abortion. Please rate each reason as a frequent, somewhat frequent or infrequent reason for abortion.<br><b>[Interviewer: Please read each reason and ask its frequency]</b> |                                                                                                                                                                                                                                                                                                                                                                                                                                                                                                                 |                   |                   |            |                 |   |                         |  |  |  |  |  |  |  |
|     | Reason                                                                                                                                                                                                                                                                  | Frequent                                                                                                                                                                                                                                                                                                                                                                                                                                                                                                        | Somewhat frequent | Infrequent        | Don't know |                 |   |                         |  |  |  |  |  |  |  |
|     | a. The woman is unmarried                                                                                                                                                                                                                                               | 1                                                                                                                                                                                                                                                                                                                                                                                                                                                                                                               | 2                 | 3                 | 98         |                 |   |                         |  |  |  |  |  |  |  |
|     | b. Economic reasons                                                                                                                                                                                                                                                     | 1                                                                                                                                                                                                                                                                                                                                                                                                                                                                                                               | 2                 | 3                 | 98         |                 |   |                         |  |  |  |  |  |  |  |
|     | c. The pregnancy is unplanned or unwanted                                                                                                                                                                                                                               | 1                                                                                                                                                                                                                                                                                                                                                                                                                                                                                                               | 2                 | 3                 | 98         |                 |   |                         |  |  |  |  |  |  |  |
|     | d. The pregnancy may affect the woman's health                                                                                                                                                                                                                          | 1                                                                                                                                                                                                                                                                                                                                                                                                                                                                                                               | 2                 | 3                 | 98         |                 |   |                         |  |  |  |  |  |  |  |
|     | e. The pregnancy threatens the woman's life                                                                                                                                                                                                                             | 1                                                                                                                                                                                                                                                                                                                                                                                                                                                                                                               | 2                 | 3                 | 98         |                 |   |                         |  |  |  |  |  |  |  |
|     | f. Indication that child will have mental or physical anomalies                                                                                                                                                                                                         | 1                                                                                                                                                                                                                                                                                                                                                                                                                                                                                                               | 2                 | 3                 | 98         |                 |   |                         |  |  |  |  |  |  |  |
|     | g. Pregnancy resulted from incest                                                                                                                                                                                                                                       | 1                                                                                                                                                                                                                                                                                                                                                                                                                                                                                                               | 2                 | 3                 | 98         |                 |   |                         |  |  |  |  |  |  |  |
|     | h. The pregnancy is the result of rape                                                                                                                                                                                                                                  | 1                                                                                                                                                                                                                                                                                                                                                                                                                                                                                                               | 2                 | 3                 | 98         |                 |   |                         |  |  |  |  |  |  |  |
|     | i. Other <i>(specify)</i> :                                                                                                                                                                                                                                             | 1                                                                                                                                                                                                                                                                                                                                                                                                                                                                                                               | 2                 | 3                 | 98         |                 |   |                         |  |  |  |  |  |  |  |
| 603 | Please indicate if any of the recommendations I am going to list could be used in Uganda to reduce the number of unsafe abortions and to lower the level of abortion in general:<br><b>[Interviewer: Please read each recommendation.]</b>                              |                                                                                                                                                                                                                                                                                                                                                                                                                                                                                                                 | Yes               | No                | Maybe      | Don't know      |   |                         |  |  |  |  |  |  |  |
|     | a. Improve sex education in schools                                                                                                                                                                                                                                     | 1                                                                                                                                                                                                                                                                                                                                                                                                                                                                                                               | 2                 | 3                 | 98         |                 |   |                         |  |  |  |  |  |  |  |
|     | b. Promote abstinence                                                                                                                                                                                                                                                   | 1                                                                                                                                                                                                                                                                                                                                                                                                                                                                                                               | 2                 | 3                 | 98         |                 |   |                         |  |  |  |  |  |  |  |
|     | c. Publicize the health risks involved in unsafe abortion                                                                                                                                                                                                               | 1                                                                                                                                                                                                                                                                                                                                                                                                                                                                                                               | 2                 | 3                 | 98         |                 |   |                         |  |  |  |  |  |  |  |
|     | d. Provide contraceptive counselling post-delivery and postabortion                                                                                                                                                                                                     | 1                                                                                                                                                                                                                                                                                                                                                                                                                                                                                                               | 2                 | 3                 | 98         |                 |   |                         |  |  |  |  |  |  |  |
|     | e. Increase availability of family planning services                                                                                                                                                                                                                    | 1                                                                                                                                                                                                                                                                                                                                                                                                                                                                                                               | 2                 | 3                 | 98         |                 |   |                         |  |  |  |  |  |  |  |
|     | f. Improve access to effective contraception for young and unmarried women                                                                                                                                                                                              | 1                                                                                                                                                                                                                                                                                                                                                                                                                                                                                                               | 2                 | 3                 | 98         |                 |   |                         |  |  |  |  |  |  |  |
| 604 | Are there any other recommendations that you would make to reduce the number of unsafe abortions in Uganda? What are they?<br><br><b>[Interviewer: Record response(s) in the space provided. If no other recommendations, write "None."]</b>                            | <table border="1" style="width: 100%; border-collapse: collapse;"> <tr><td style="height: 20px;"> </td></tr> </table> |                   |                   |            |                 |   |                         |  |  |  |  |  |  |  |
|     |                                                                                                                                                                                                                                                                         |                                                                                                                                                                                                                                                                                                                                                                                                                                                                                                                 |                   |                   |            |                 |   |                         |  |  |  |  |  |  |  |
|     |                                                                                                                                                                                                                                                                         |                                                                                                                                                                                                                                                                                                                                                                                                                                                                                                                 |                   |                   |            |                 |   |                         |  |  |  |  |  |  |  |
|     |                                                                                                                                                                                                                                                                         |                                                                                                                                                                                                                                                                                                                                                                                                                                                                                                                 |                   |                   |            |                 |   |                         |  |  |  |  |  |  |  |
|     |                                                                                                                                                                                                                                                                         |                                                                                                                                                                                                                                                                                                                                                                                                                                                                                                                 |                   |                   |            |                 |   |                         |  |  |  |  |  |  |  |
|     |                                                                                                                                                                                                                                                                         |                                                                                                                                                                                                                                                                                                                                                                                                                                                                                                                 |                   |                   |            |                 |   |                         |  |  |  |  |  |  |  |
|     |                                                                                                                                                                                                                                                                         |                                                                                                                                                                                                                                                                                                                                                                                                                                                                                                                 |                   |                   |            |                 |   |                         |  |  |  |  |  |  |  |
|     |                                                                                                                                                                                                                                                                         |                                                                                                                                                                                                                                                                                                                                                                                                                                                                                                                 |                   |                   |            |                 |   |                         |  |  |  |  |  |  |  |
|     |                                                                                                                                                                                                                                                                         |                                                                                                                                                                                                                                                                                                                                                                                                                                                                                                                 |                   |                   |            |                 |   |                         |  |  |  |  |  |  |  |
|     |                                                                                                                                                                                                                                                                         |                                                                                                                                                                                                                                                                                                                                                                                                                                                                                                                 |                   |                   |            |                 |   |                         |  |  |  |  |  |  |  |
|     |                                                                                                                                                                                                                                                                         |                                                                                                                                                                                                                                                                                                                                                                                                                                                                                                                 |                   |                   |            |                 |   |                         |  |  |  |  |  |  |  |
| 605 | Do you feel that the laws of Uganda on abortion should be modified?                                                                                                                                                                                                     | <table border="1" style="width: 100%; border-collapse: collapse;"> <tr> <td style="width: 20px; text-align: center;">1</td> <td>Yes</td> </tr> <tr> <td style="text-align: center;">2</td> <td>No <b>[END]</b></td> </tr> <tr> <td style="text-align: center;">3</td> <td>No opinion <b>[END]</b></td> </tr> </table>                                                                                                                                                                                           | 1                 | Yes               | 2          | No <b>[END]</b> | 3 | No opinion <b>[END]</b> |  |  |  |  |  |  |  |
| 1   | Yes                                                                                                                                                                                                                                                                     |                                                                                                                                                                                                                                                                                                                                                                                                                                                                                                                 |                   |                   |            |                 |   |                         |  |  |  |  |  |  |  |
| 2   | No <b>[END]</b>                                                                                                                                                                                                                                                         |                                                                                                                                                                                                                                                                                                                                                                                                                                                                                                                 |                   |                   |            |                 |   |                         |  |  |  |  |  |  |  |
| 3   | No opinion <b>[END]</b>                                                                                                                                                                                                                                                 |                                                                                                                                                                                                                                                                                                                                                                                                                                                                                                                 |                   |                   |            |                 |   |                         |  |  |  |  |  |  |  |

|     |                                                                                                                                                                                                                                                                                   |                                     |                                             |
|-----|-----------------------------------------------------------------------------------------------------------------------------------------------------------------------------------------------------------------------------------------------------------------------------------|-------------------------------------|---------------------------------------------|
| 606 | Under what circumstances do you think that abortion should be provided?<br><br><b>[Interviewer: DO NOT READ the list and circle all that apply. Multiple responses are allowed.]</b><br><br><br><br><br><br><b>[Interviewer: Record other response(s) in the space provided.]</b> | <b>Abortion should be provided:</b> |                                             |
|     |                                                                                                                                                                                                                                                                                   | <input type="checkbox"/> 1          | On demand (if the woman requests for it)    |
|     |                                                                                                                                                                                                                                                                                   | <input type="checkbox"/> 1          | If the woman's health is at risk            |
|     |                                                                                                                                                                                                                                                                                   | <input type="checkbox"/> 1          | If the girl is still in school              |
|     |                                                                                                                                                                                                                                                                                   | <input type="checkbox"/> 1          | Unmarried girl/woman                        |
|     |                                                                                                                                                                                                                                                                                   | <input type="checkbox"/> 1          | If the girl/woman cannot care for the child |
|     |                                                                                                                                                                                                                                                                                   | <input type="checkbox"/> 1          | If the mother is HIV+                       |
|     |                                                                                                                                                                                                                                                                                   | <input type="checkbox"/> 1          | Pregnancies after incest                    |
|     |                                                                                                                                                                                                                                                                                   | <input type="checkbox"/> 1          | Pregnancies after rape                      |
|     |                                                                                                                                                                                                                                                                                   | <input type="checkbox"/> 1          | Contraceptive failure                       |
|     |                                                                                                                                                                                                                                                                                   | <input type="checkbox"/> 1          | Abortion should not ever be provided        |
|     | <input type="checkbox"/> 96                                                                                                                                                                                                                                                       | Others (Specify) _____<br>_____     |                                             |

**Thank you very much for your time. Your views are very important and will help make health services better for women. If you are interested in receiving the final publication based on this survey after it is completed, for women we will be happy to provide it to you.**

1 YES, agrees to be contacted to receive publication       2 NO, does not agree to be contacted  
***[Interviewer: Please record contact information in a place separate from the questionnaire]***

Interviewer observations: \_\_\_\_\_  
 \_\_\_\_\_  
 \_\_\_\_\_  
 \_\_\_\_\_  
 \_\_\_\_\_  
 \_\_\_\_\_
